# Supplementary material for: Validation of pre-operative risk scores of contrast-induced acute kidney injury in a Chinese cohort
Source: BMC Nephrol. 2020 Feb 10;21:45. doi: 10.1186/s12882-020-1700-8 (PMC7011449; doi:10.1186/s12882-020-1700-8)
Supplement: Supplementary file 2 — Additional file 2: Data. [file 12882_2020_1700_MOESM2_ESM.xls]

## Sheet: Data
	Age（1=21-30; 2=31-40; 3=41-50; 4=51-60; 5=61-70; 6=71-80; 7=81-90; 8=91-100; 21-91; 63.31±10.21）	Date of surgery	Diabetes (1=1045,0=1624)	LVEF (2-86; 56.64±16.95)	Weight (32-176; 64.46±11.25)	Baseline Scr(μmol/L)	Baseline Scr (mg/dL)	Increased Scr (μmol/L)	Scr absolute elevated value	Scr relatively elevated value	CI-AKI broad1 (1=178, 0=2491)	CI-AKI broad2 (1=39, 0=2630)	CI-AKI-narrow (1=18, 0=2651)	MDRD eGFR (87.24±35.12)	CG CrCl (74.28±27.01)	Myocardial infarction (1=652, 0=2017)	Hypotension (1=139, 0=2530)	Anemia (1=817, 0=1852)	Urgent PCI (1=13, 0=2656)	Shock (1=20, 0=2649)	Hypertension (1=1467, 0=1202)	Congestive heart failure (1=306, 0=2363)	Cardiac function level(NYHA)	Cardiac function level(KILLIP)	PCI (1=753, 0=1916)	IABP (1=13, 0=2656)	Multivessel PCI (1=203, 0=2466)	Sex(1=male:1743，2=female: 926)	Acute coronary syndrome (1=929, 0=1740)	HDL (0.24-2.51; 1.17±0.28)
1	5	2016-11-21	1	72	69	691	7.81674	881	190	1.27496	1	1	1	5.52828	7.91083	1	0	1	0	0	0	1	3		0	0	0	2	1	0.6
2	6	2008-11-05	1	38	64.4654	110	1.24434	175	65	1.59091	1	1	1	60.3373	47.5428	1	0	1	0	0	0	0			0	0	0	1	1	1.1732
3	6	2015-12-28	0	58	74	128	1.44796	187	59	1.46094	1	1	1	37.4626	39.131	0	0	1	0	0	1	0			0	0	0	2	1	1.67
4	5	2015-09-30	0	67	54	101	1.14253	160	59	1.58416	1	1	1	68.3246	49.1679	0	0	0	0	0	1	0			0	0	0	1	1	0.91
5	6	2015-05-11	0	58	53	159	1.79864	211	52	1.32704	1	1	1	39.7872	28.3185	1	0	1	0	0	1	0			0	0	0	1	1	1.1732
6	5	2010-04-26	1	63	76	24	0.271493	68	44	2.83333	1	1	0	269.745	261.113	0	0	0	0	0	1	0			0	0	0	2	1	1.45
7	5	2015-12-09	0	64	82	54	0.61086	97	43	1.7963	1	1	0	105.285	122.807	0	0	0	0	0	1	0			0	0	0	2	1	2.02
8	6	2012-05-07	1	34	64.4654	48	0.542986	89	41	1.85417	1	1	0	158.122	112.751	1	0	0	0	0	1	0		2	1	0	0	1	1	1.23
9	4	2016-04-21	1	61	67	95	1.07466	134	39	1.41053	1	0	0	56.0021	61.4769	1	0	0	0	0	1	0			1	0	1	2	1	0.9
10	4	2013-04-04	0	52	64	85	0.961538	124	39	1.45882	1	0	0	85.1304	75.1257	0	0	1	0	0	0	0			1	0	0	1	1	1.05
11	5	2015-08-24	0	51	59	69	0.780543	108	39	1.56522	1	1	0	106.288	79.3678	0	0	0	0	0	0	0			0	0	0	1	1	0.97
12	4	2016-11-02	0	42	55	46	0.520362	84	38	1.82609	1	1	0	174.11	122.194	1	0	0	0	0	1	0		1	1	0	0	1	1	0.88
13	3	2012-02-22	0	63	51	46	0.520362	84	38	1.82609	1	1	0	179.059	123.272	1	0	1	0	0	1	0			0	0	0	1	1	0.86
14	5	2015-11-03	0	60	53	217	2.45475	253	36	1.1659	0	0	0	28.1282	21.9794	0	0	0	0	0	1	0		2	0	0	0	1	1	0.93
15	5	2014-11-10	0	56	48	91	1.02941	127	36	1.3956	1	0	0	77.403	49.4195	0	1	1	0	0	0	0	2		1	0	0	1	1	1.33
16	5	2015-08-24	0	76	51	77	0.871041	112	35	1.45455	1	0	0	93.0666	59.8429	1	1	1	0	0	1	0		4	1	0	0	1	1	0.95
17	4	2015-05-22	1	45	57	42	0.475113	76	34	1.80952	1	1	0	191.08	132.95	1	0	0	0	0	1	0			0	0	0	1	1	1.1732
18	5	2016-06-22	1	50	65	157	1.77602	190	33	1.21019	0	0	0	40.8507	37.2003	0	0	1	0	0	0	0			0	0	0	1	1	0.95
19	5	2013-02-16	0	58	76	139	1.5724	172	33	1.23741	0	0	0	34.7261	40.8946	0	0	1	0	0	1	0			0	0	0	2	1	1.04
20	5	2016-01-22	1	67	75	122	1.38009	155	33	1.27049	1	0	0	40.4077	46.1926	1	0	0	0	0	0	0			0	0	0	2	1	1.11
21	4	2015-07-08	0	72	64.4654	62	0.701357	95	33	1.53226	1	1	0	123.149	105.605	0	0	0	0	0	0	0			0	0	0	1	1	1.11
22	5	2016-11-10	0	42	55	61	0.690045	91	30	1.4918	1	0	0	121.444	80.4935	1	0	1	0	0	1	0			1	0	0	1	1	0.89
23	5	2017-01-16	1	48	62	35	0.395928	64	29	1.82857	1	1	0	229.694	155.391	1	0	0	0	0	1	0		1	0	0	0	1	1	1.05
24	3	2014-04-01	1	64	64.4654	128	1.44796	156	28	1.21875	0	0	0	54.8718	55.7365	1	0	0	0	0	0	0			1	0	1	1	1	1.59
25	4	2015-08-17	0	63	59	74	0.837104	102	28	1.37838	1	0	0	100.579	81.4529	1	0	0	0	0	1	0			0	0	0	1	1	1.03
26	6	2011-06-28	1	74	70	88	0.995475	115	27	1.30682	1	0	0	57.4436	52.306	0	0	1	0	0	1	0		3	0	0	0	2	1	2.49
27	5	2012-08-08	1	51	58	84	0.950226	111	27	1.32143	1	0	0	85.4527	66.4103	1	0	0	0	0	1	0			0	0	0	1	1	0.97
28	6	2015-10-10	0	67	69	117	1.32353	143	26	1.22222	0	0	0	41.5552	39.914	1	0	0	0	0	1	0			0	0	0	2	1	1.1732
29	4	2015-06-01	0	3	64.4654	91	1.02941	117	26	1.28571	1	0	0	79.3573	72.7749	1	0	1	0	0	1	0			0	0	0	1	1	1.64
30	4	2016-05-25	0	33	60	75	0.848416	101	26	1.34667	1	0	0	100.458	85.5206	1	0	0	0	0	0	0			1	0	0	1	1	1.34
31	4	2014-12-01	0	67	55	48	0.542986	74	26	1.54167	1	1	0	169.048	124.456	0	0	0	0	0	1	0			0	0	0	1	1	0.98
32	6	2015-08-31	0	27	45	119	1.34615	144	25	1.21008	0	0	0	54.5404	28.8989	1	0	1	0	0	1	0		1	0	0	0	1	1	1.38
33	5	2013-07-08	0	45	68	92	1.04072	117	25	1.27174	1	0	0	56.1582	56.4237	1	0	1	0	0	0	0	2		1	0	1	2	1	1.3
34	3	2015-07-20	0	55	65	61	0.690045	86	25	1.40984	1	0	0	133.684	128.305	1	0	0	0	0	1	0			1	0	1	1	1	0.82
35	6	2016-05-20	1	61	66	88	0.995475	112	24	1.27273	1	0	0	77.1938	57.0034	1	0	0	0	0	1	0			0	0	0	1	1	1.17
36	5	2015-05-13	0	69	60	50	0.565611	73	23	1.46	1	0	0	153.611	109.777	1	0	1	0	0	1	0			0	0	0	1	1	1.38
37	4	2015-12-15	1	41	62	36	0.40724	59	23	1.63889	1	1	0	231.83	178.03	1	0	1	0	0	1	0			0	0	0	1	1	1.23
38	4	2016-10-09	0	66	83	81	0.91629	103	22	1.2716	1	0	0	68.0245	92.3651	1	0	0	0	0	0	1	3		0	0	0	2	1	1.28
39	3	2015-03-27	1	48	120	80	0.904977	102	22	1.275	1	0	0	69.8709	140.201	1	0	0	0	0	1	1	3		1	0	0	2	1	0.82
40	5	2015-07-06	1	72	56	77	0.871041	99	22	1.28571	1	0	0	92.5854	64.1759	0	0	0	0	0	0	0			0	0	0	1	1	1.2
41	7	2015-01-26	0	64	66	64	0.723982	86	22	1.34375	1	0	0	108.99	66.7588	0	1	0	0	0	0	0			0	0	0	1	1	1.1732
42	5	2017-02-27	0	63	60	119	1.34615	140	21	1.17647	0	0	0	56.3385	45.6399	0	0	0	0	0	1	0			1	0	0	1	1	0.89
43	6	2011-06-15	1	83	82	82	0.927602	103	21	1.2561	1	0	0	63.204	71.1371	0	0	0	0	0	0	1	4		0	0	0	2	1	1.05
44	5	2015-02-13	0	51	64.4654	67	0.757919	88	21	1.31343	1	0	0	111.087	93.0436	0	0	0	0	0	1	0			1	0	0	1	1	1.1732
45	5	2015-07-29	0	46	55	65	0.735294	86	21	1.32308	1	0	0	111.887	72.4888	0	0	1	0	0	1	0			0	0	0	1	1	1.1732
46	3	2014-03-03	0	64	86	64	0.723982	85	21	1.32812	1	0	0	92.9424	134.657	1	0	1	0	0	1	0			0	0	0	2	1	1.1732
47	4	2014-11-26	0	69	64.4654	64	0.723982	85	21	1.32812	1	0	0	118.382	101.308	0	0	1	0	0	0	0	2		1	0	0	1	1	1.27
48	5	2015-02-13	0	68	70	63	0.71267	84	21	1.33333	1	0	0	88.6817	92.0633	0	0	1	0	0	1	0			0	0	0	2	1	0.62
49	7	2014-01-22	0	69	65	95	1.07466	115	20	1.21053	0	0	0	70.0841	49.2666	1	0	0	0	0	1	1	4		0	0	0	1	1	0.64
50	6	2015-06-08	0	61	51	84	0.950226	104	20	1.2381	0	0	0	81.4924	46.2906	1	0	0	0	0	1	0			1	0	0	1	1	0.96
51	5	2014-03-31	1	61	59	79	0.893665	99	20	1.25316	1	0	0	89.7557	65.455	0	0	0	0	0	1	0	2		0	0	0	1	1	1.42
52	5	2016-09-07	0	45	52	68	0.769231	88	20	1.29412	1	0	0	107.866	70.3498	0	0	1	0	0	1	0			0	0	0	1	1	1.22
53	5	2014-09-10	0	59	68	114	1.28959	133	19	1.16667	0	0	0	44.0244	46.3468	1	0	1	0	0	0	0		1	1	0	0	2	1	1.41
54	4	2014-12-10	0	62	75	63	0.71267	82	19	1.30159	1	0	0	90.0882	104.256	1	0	0	0	0	0	0			0	0	0	2	1	1.1732
55	5	2012-04-23	1	79	61.8	51	0.576923	70	19	1.37255	1	0	0	149.685	109.382	1	0	1	0	0	1	0		2	0	0	0	1	1	1.85
56	4	2017-03-13	0	36	64.4654	113	1.27828	131	18	1.15929	0	0	0	45.7896	49.5462	0	0	0	0	0	0	0	2		0	0	0	2	1	1.55
57	5	2011-10-12	0	65	60.9	81	0.91629	99	18	1.22222	0	0	0	88.3912	69.9791	0	0	1	0	0	0	0			0	0	0	1	1	1.1732
58	6	2016-04-18	0	74	59	77	0.871041	95	18	1.23377	0	0	0	91.4756	63.6911	1	0	0	0	0	1	0			0	0	0	1	1	0.86
59	6	2017-02-10	0	49	66	75	0.848416	93	18	1.24	0	0	0	94.5626	74.2251	1	0	1	0	0	1	0	2		1	0	0	1	1	0.88
60	5	2015-06-03	0	67	62	63	0.71267	81	18	1.28571	1	0	0	118.319	92.2041	1	1	1	0	0	1	1	3		1	0	0	1	1	0.94
61	4	2017-01-16	0	53	64.4654	61	0.690045	79	18	1.29508	1	0	0	128.337	115.135	1	0	1	0	0	1	0			0	0	0	1	1	1.08
62	5	2014-06-23	0	69	45	49	0.554299	67	18	1.36735	1	0	0	157.304	84.174	0	0	1	0	0	1	0			0	0	0	1	1	1.64
63	4	2015-07-29	0	67	64	76	0.859729	93	17	1.22368	0	0	0	99.0813	90.4211	1	0	0	0	0	1	0			1	0	0	1	1	1.14
64	6	2016-11-07	1	58	62	73	0.825792	90	17	1.23288	0	0	0	97.6356	71.9254	1	0	0	0	0	1	0			0	0	0	1	1	0.96
65	4	2015-10-28	1	43	56	62	0.701357	79	17	1.27419	1	0	0	122.981	91.3085	0	0	0	0	0	0	1	3		1	0	1	1	1	1.07
66	5	2015-02-13	0	56	60	61	0.690045	78	17	1.27869	1	0	0	122.725	91.9038	0	0	0	0	0	1	0			0	0	0	1	1	1.1732
67	6	2017-01-04	0	62	50	51	0.576923	68	17	1.33333	1	0	0	146.026	78.122	1	0	0	0	0	1	0			0	0	0	1	1	1.1732
68	4	2017-02-06	0	74	71	51	0.576923	68	17	1.33333	1	0	0	116.165	125.978	1	0	0	0	0	0	0			0	0	0	2	1	0.98
69	6	2014-12-15	0	44	52	46	0.520362	63	17	1.36957	1	0	0	163.095	85.6063	0	0	1	0	0	1	0		2	1	0	0	1	1	1.34
70	6	2016-09-14	0	64	56	95	1.07466	111	16	1.16842	0	0	0	71.201	46.8569	0	0	1	0	0	0	0			0	0	0	1	1	1.1
71	6	2016-04-25	0	34	48	81	0.91629	97	16	1.19753	0	0	0	85.6979	47.4656	0	0	0	0	0	1	0			0	0	0	1	1	0.81
72	5	2015-05-29	1	68	60	75	0.848416	91	16	1.21333	0	0	0	95.8275	71.9148	1	0	0	0	0	0	0	2		1	0	0	1	1	1.01
73	5	2014-05-26	1	66	64.4654	72	0.81448	88	16	1.22222	0	0	0	102.165	86.3624	1	0	1	0	0	1	1	4		1	0	1	1	1	1.05
74	4	2015-06-16	0	75	78	69	0.780543	85	16	1.23188	0	0	0	80.1042	94.8022	0	0	0	0	0	1	0			0	0	0	2	1	1.14
75	2	2013-06-26	0	68	77	68	0.769231	84	16	1.23529	0	0	0	88.9967	119.851	0	0	0	0	0	1	0	2		0	0	0	2	1	1.33
76	5	2016-04-26	0	29	52	58	0.656109	74	16	1.27586	1	0	0	131.001	86.1734	0	0	0	0	0	0	0			0	0	0	1	1	1.32
77	6	2011-02-18	1	4	67	101	1.14253	116	15	1.14851	0	0	0	49.8691	48.0473	1	0	0	0	0	1	0			1	0	0	2	1	1.26
78	3	2015-04-27	0	51	75	90	1.0181	105	15	1.16667	0	0	0	62.0599	81.4874	1	0	0	0	0	1	0			0	0	0	2	1	1.33
79	5	2015-05-13	0	64	74	89	1.00679	104	15	1.16854	0	0	0	58.1204	62.3428	1	0	1	0	0	1	1	4		0	0	0	2	1	1.57
80	6	2016-08-29	0	56	70	81	0.91629	96	15	1.18519	0	0	0	63.5308	58.5386	1	1	0	0	0	1	0			0	0	0	2	1	0.99
81	5	2017-03-06	0	6	64.4654	80	0.904977	95	15	1.1875	0	0	0	66.9471	65.376	1	0	0	0	0	1	0			0	0	0	2	1	1.4
82	3	2016-07-22	1	68	81	79	0.893665	94	15	1.18987	0	0	0	71.2472	97.1442	0	0	0	0	0	1	0			0	0	0	2	1	1.23
83	5	2016-04-01	0	64	75	74	0.837104	89	15	1.2027	0	0	0	73.3414	82.6321	0	0	0	0	0	0	0			0	0	1	2	1	1.1732
84	5	2015-12-30	0	77	73	71	0.803167	86	15	1.21127	0	0	0	75.7908	78.7677	0	0	0	0	0	1	0			1	0	0	2	1	1.34
85	6	2015-12-25	0	68	55	34	0.384615	49	15	1.44118	1	0	0	232.532	126.932	1	0	0	0	0	0	0			0	0	0	1	1	1.08
86	6	2015-09-18	0	56	67	104	1.17647	118	14	1.13462	0	0	0	46.9514	40.0393	0	0	0	0	0	1	0		1	1	0	1	2	1	1.14
87	4	2015-04-15	1	58	82	81	0.91629	95	14	1.17284	0	0	0	68.1052	91.5822	0	0	1	0	0	1	0	2		0	0	0	2	1	1.06
88	5	2015-03-18	1	74	73	76	0.859729	90	14	1.18421	0	0	0	71.1514	78.4521	1	0	1	0	0	1	0			0	0	0	2	1	1.34
89	5	2015-05-13	0	75	58	71	0.803167	85	14	1.19718	0	0	0	102.257	73.9892	1	0	0	0	0	1	0			0	0	0	1	1	0.94
90	3	2017-02-10	0	60	80	67	0.757919	81	14	1.20896	0	0	0	87.2486	116.785	0	0	1	0	0	1	0			0	0	0	2	1	1.35
91	4	2014-02-17	0	62	60	64	0.723982	78	14	1.21875	0	0	0	118.9	95.7131	1	0	0	0	0	0	0			0	0	0	1	1	0.83
92	5	2016-03-02	1	77	64	38	0.429864	52	14	1.36842	1	0	0	208.925	147.83	1	0	1	0	0	1	0		1	0	0	0	1	1	1.07
93	6	2007-05-30	0	63	64.4654	102	1.15385	115	13	1.12745	0	0	0	65.04	47.7531	0	0	1	0	0	0	0		1	1	0	1	1	1	1.09
94	5	2014-09-10	0	62	57	90	1.0181	103	13	1.14444	0	0	0	77.1809	55.3752	1	0	0	0	0	0	0			0	0	0	1	1	1.32
95	6	2016-01-29	0	74	44	89	1.00679	102	13	1.14607	0	0	0	76.5804	38.7427	1	0	0	0	0	0	0			0	0	0	1	1	0.96
96	7	2015-07-20	0	66	57	83	0.938914	96	13	1.15663	0	0	0	81.5901	48.1463	0	0	0	0	0	1	0			0	0	0	1	1	1.56
97	4	2015-08-12	0	71	44	75	0.848416	88	13	1.17333	0	0	0	98.5961	59.0347	1	0	0	0	0	0	0		1	0	0	0	1	1	1.06
98	3	2015-04-22	0	67	83	74	0.837104	87	13	1.17568	0	0	0	77.5944	109.007	1	0	0	0	0	1	0			0	0	0	2	1	1.83
99	4	2015-02-06	0	63	83	68	0.769231	81	13	1.19118	0	0	0	82.0652	105.06	1	0	0	0	0	0	0			1	0	0	2	1	1.71
100	4	2016-04-13	0	50	62	65	0.735294	78	13	1.2	0	0	0	118.388	101.688	1	0	0	0	0	1	0			1	0	1	1	1	0.64
101	5	2015-04-13	1	71	74	61	0.690045	74	13	1.21311	0	0	0	90.1654	92.305	1	0	0	0	0	1	1	4		0	0	0	2	1	1.32
102	5	2015-11-09	0	73	64.4654	61	0.690045	74	13	1.21311	0	0	0	121.716	95.3026	1	1	1	0	0	1	0			1	0	0	1	1	1.1732
103	4	2015-07-24	1	70	62	57	0.644796	70	13	1.22807	0	0	0	134.606	107.372	0	0	0	0	0	1	1	4		0	0	0	1	1	1.1732
104	5	2015-04-13	0	6	45	53	0.599548	66	13	1.24528	0	0	0	144.115	78.8151	0	0	0	0	0	0	0			0	0	0	1	1	1.37
105	4	2012-07-09	1	51	65	44	0.497738	57	13	1.29545	1	0	0	182.193	147.928	0	0	1	0	0	1	0		1	0	0	0	1	1	0.85
106	3	2014-05-05	0	65	67	37	0.418552	50	13	1.35135	1	0	0	173.779	178.737	0	0	1	0	0	0	0			1	0	0	2	1	1.35
107	7	2011-06-17	0	79	58	138	1.56109	150	12	1.08696	0	0	0	45.6425	30.6786	1	0	0	0	1	0	0		3	0	0	0	1	1	0.92
108	5	2014-05-28	1	62	64	129	1.45928	141	12	1.09302	0	0	0	51.2296	44.5199	0	0	0	0	0	1	0			1	0	1	1	1	1.1732
109	4	2014-06-09	0	56	83	102	1.15385	114	12	1.11765	0	0	0	51.0231	68.2441	0	0	0	0	0	0	0			0	0	0	2	1	1.1732
110	3	2014-06-18	1	43	89	99	1.11991	111	12	1.12121	0	0	0	55.9319	89.1774	0	0	1	0	0	0	0			0	0	1	2	1	0.88
111	6	2017-01-06	0	25	52	93	1.05204	105	12	1.12903	0	0	0	73.541	46.3886	1	1	1	0	0	1	0			0	0	1	1	1	2.51
112	5	2014-06-11	0	67	66	80	0.904977	92	12	1.15	0	0	0	89.6294	76.6514	1	0	0	0	0	0	0			0	0	0	1	1	1.18
113	5	2016-02-29	0	65	61	72	0.81448	84	12	1.16667	0	0	0	99.485	72.777	0	0	0	0	0	1	0			0	0	0	1	1	1.21
114	5	2016-01-18	1	39	65	71	0.803167	83	12	1.16901	0	0	0	103.063	85.7429	1	0	0	0	0	1	0	2		0	0	0	1	1	0.9
115	4	2014-03-24	0	58	60	67	0.757919	79	12	1.1791	0	0	0	112.777	91.4244	1	0	0	0	0	0	0			1	0	0	1	1	0.87
116	5	2016-01-08	0	34	59	66	0.746606	78	12	1.18182	0	0	0	110.586	78.7987	0	0	0	0	0	1	0			1	0	0	1	1	0.95
117	5	2014-08-20	0	72	60	64	0.723982	76	12	1.1875	0	0	0	115.716	86.3502	1	0	1	0	0	0	0		1	1	0	0	1	1	1.51
118	6	2013-11-15	1	50	65	55	0.622172	67	12	1.21818	0	0	0	135.362	100.076	1	0	0	0	0	1	0			1	0	0	1	1	0.84
119	5	2014-12-10	1	76	40	53	0.599548	65	12	1.22642	0	0	0	142.51	66.6738	0	0	1	0	0	1	0			0	0	0	1	1	1.27
120	4	2014-11-03	1	7	64.4654	50	0.565611	62	12	1.24	0	0	0	156.945	128.352	1	0	1	0	0	0	0			0	0	1	1	1	1.37
121	5	2011-10-28	1	3	54	50	0.565611	62	12	1.24	0	0	0	152.982	97.0269	0	0	0	0	0	1	0			0	0	0	1	1	0.99
122	4	2017-01-18	0	65	70	44	0.497738	56	12	1.27273	1	0	0	135.594	136.84	0	1	1	0	0	1	0			1	0	0	2	1	1.57
123	6	2015-01-16	0	53	48	42	0.475113	54	12	1.28571	1	0	0	182.615	90.8296	1	0	1	0	0	1	0			0	0	0	1	1	1.1
124	6	2015-11-11	0	63	72	371	4.19683	382	11	1.02965	0	0	0	10.8562	12.324	1	0	1	0	0	0	0			0	0	0	2	1	1.05
125	4	2014-07-21	1	58	74	86	0.972851	97	11	1.12791	0	0	0	62.0945	72.0263	1	0	0	0	0	1	0	2	1	1	0	1	2	1	1.34
126	4	2015-06-12	0	86	60	85	0.961538	96	11	1.12941	0	0	0	87.1292	75.9295	0	0	0	0	0	1	0			0	0	0	1	1	1.1732
127	4	2014-06-27	1	62	93	84	0.950226	95	11	1.13095	0	0	0	64.474	96.141	0	0	1	0	0	0	0			0	0	0	2	1	0.92
128	6	2015-06-03	1	62	64.4654	83	0.938914	94	11	1.13253	0	0	0	83.6429	63.5597	1	0	1	0	0	0	0			0	0	0	1	1	1.26
129	4	2015-05-27	1	61	69	78	0.882353	89	11	1.14103	0	0	0	69.8235	75.2947	1	0	0	0	0	0	0			0	0	0	2	1	1.65
130	4	2014-06-16	1	48	62	74	0.837104	85	11	1.14865	0	0	0	102.2	90.0192	0	0	0	0	0	0	0			0	0	0	1	1	1.1732
131	3	2012-06-13	0	45	73.5	73	0.825792	84	11	1.15068	0	0	0	78.6458	97.3061	1	0	0	0	0	1	0			0	0	1	2	1	1.17
132	4	2016-01-20	1	41	70	72	0.81448	83	11	1.15278	0	0	0	76.0625	80.7361	0	0	0	0	0	1	0			0	0	0	2	1	1.2
133	5	2013-05-06	1	72	59	71	0.803167	82	11	1.15493	0	0	0	103.927	80.4473	0	0	0	0	0	1	0			1	0	0	1	1	1.29
134	4	2016-03-14	0	72	66	69	0.780543	80	11	1.15942	0	0	0	110.93	103.147	1	0	0	0	1	0	1	3		0	0	0	1	1	0.94
135	4	2015-08-24	0	60	75	64	0.723982	75	11	1.17188	0	0	0	89.6899	107.116	1	0	0	0	0	0	0			0	0	0	2	1	1.98
136	6	2013-03-29	1	45	85	63	0.71267	74	11	1.1746	0	0	0	85.3742	94.2195	1	0	0	0	0	1	1	3		1	0	0	2	1	0.95
137	5	2013-02-25	1	56	53	62	0.701357	73	11	1.17742	0	0	0	120.636	80.3986	1	0	0	0	0	0	0		1	1	0	0	1	1	0.92
138	3	2015-01-28	1	37	72	61	0.690045	72	11	1.18033	0	0	0	96.0835	112.03	1	1	1	0	0	0	1	4		1	0	0	2	1	1.08
139	5	2013-06-08	0	72	61	61	0.690045	72	11	1.18033	0	0	0	121.736	90.2433	0	0	0	0	0	1	0			0	0	0	1	1	1.1732
140	4	2012-06-18	0	66	66	60	0.678733	71	11	1.18333	0	0	0	127.288	109.88	1	0	0	0	0	1	0			0	0	0	1	1	1.06
141	5	2012-06-18	0	6	49.8	58	0.656109	69	11	1.18966	0	0	0	129.596	78.978	0	0	0	0	0	0	0			1	0	0	1	1	1.05
142	6	2015-04-20	1	64	68	55	0.622172	66	11	1.2	0	0	0	98.6039	80.2768	1	0	0	0	0	0	0			0	0	0	2	1	1.88
143	4	2014-02-10	0	7	51	55	0.622172	66	11	1.2	0	0	0	141.866	95.2116	0	0	0	0	0	1	0			0	0	0	1	1	0.9
144	5	2016-10-21	0	70	56	43	0.486425	54	11	1.25581	1	0	0	184.357	123.383	0	1	0	0	0	0	0			0	0	0	1	1	1.1732
145	3	2011-06-14	1	66	70	98	1.1086	108	10	1.10204	0	0	0	55.8556	68.6251	0	0	0	0	0	1	0			1	0	0	2	1	1.2
146	4	2012-05-14	0	34	48.6	94	1.06335	104	10	1.10638	0	0	0	76.0934	52.2995	1	0		0	0	0	0			0	0	0	1	1	1.21
147	4	2011-06-27	1	63	60	93	1.05204	103	10	1.10753	0	0	0	77.3393	66.1296	1	0	0	0	0	0	0			0	0	0	1	1	1.1732
148	8	2015-01-26	1	68	64.4654	83	0.938914	93	10	1.12048	0	0	0	80.0369	46.6012	1	0	0	0	0	1	0		1	1	0	0	1	1	1.15
149	2	2015-06-01	0	33	74	81	0.91629	91	10	1.12346	0	0	0	73.2106	97.876	1	0	0	0	0	0	0			0	0	0	2	1	1.43
150	4	2015-07-08	1	31	48	79	0.893665	89	10	1.12658	0	0	0	92.7409	60.8709	0	0	0	0	0	1	0			0	0	0	1	1	1.27
151	5	2012-07-02	0	18	75	76	0.859729	86	10	1.13158	0	0	0	69.4113	72.354	1	0	1	0	0	0	0			0	0	0	2	1	1.1732
152	5	2016-08-22	1	71	52	73	0.825792	83	10	1.13699	0	0	0	98.9983	64.4243	1	0	0	0	0	0	0	2		1	0	0	1	1	1.46
153	4	2015-04-15	0	76	64	71	0.803167	81	10	1.14085	0	0	0	107.563	97.8106	0	0	0	0	0	0	0		3	1	0	1	1	1	1
154	5	2013-07-19	0	54	50	69	0.780543	79	10	1.14493	0	0	0	107.298	69.869	1	0	0	0	0	1	0			0	0	0	1	1	1.27
155	4	2013-09-23	0	39	66	69	0.780543	79	10	1.14493	0	0	0	111.617	104.981	0	0	1	0	0	0	0			0	0	0	1	1	0.74
156	2	2011-10-18	1	53	70	66	0.746606	76	10	1.15152	0	0	0	91.3316	110.419	0	0	0	0	0	0	0			0	0	0	2	1	1.16
157	4	2014-06-11	1	63	71	65	0.735294	75	10	1.15385	0	0	0	87.4109	97.4887	1	0	0	0	0	0	0			0	0	0	2	1	1.64
158	5	2012-06-18	0	59	58.8	62	0.701357	72	10	1.16129	0	0	0	121.419	91.5098	0	0	0	0	0	1	1	3		1	0	0	1	1	1.13
159	5	2013-03-04	1	57	62	60	0.678733	70	10	1.16667	0	0	0	123.15	90.0675	1	0	1	0	0	0	0		1	1	0	0	1	1	1.27
160	3	2012-12-24	0	54	75	51	0.576923	61	10	1.19608	0	0	0	118.193	139.756	1	0	0	0	0	0	1	3		0	0	0	2	1	1.02
161	4	2016-12-12	1	49	64.4654	93	1.05204	102	9	1.09677	0	0	0	77.954	72.891	0	0	1	0	0	1	1	4		1	1	0	1	1	0.95
162	3	2015-10-19	0	64	77	117	1.32353	126	9	1.07692	0	0	0	45.1917	62.0133	0	0	0	0	0	1	0			0	0	0	2	1	1.4
163	4	2014-01-09	1	71	64.4654	107	1.21041	116	9	1.08411	0	0	0	66.0064	62.4439	0	0	1	0	0	0	0		1	0	0	0	1	1	1.3
164	5	2015-03-02	1	2	68	104	1.17647	113	9	1.08654	0	0	0	48.265	47.6138	1	0		0	0	1	0			1	0	0	2	1	1.7
165	6	2012-07-25	0	57	60	103	1.16516	112	9	1.08738	0	0	0	64.1872	43.475	0	0	0	0	0	0	0			0	0	0	1	1	0.99
166	6	2015-09-07	0	55	55	99	1.11991	108	9	1.09091	0	0	0	68.5392	46.5061	0	0	0	0	0	0	0			0	0	0	1	1	1.18
167	3	2013-07-10	1	56	75	91	1.02941	100	9	1.0989	0	0	0	60.2163	77.0266	0	0		0	0	1	0			0	0	0	2	1	1.1
168	6	2015-01-16	1	62	64.4654	90	1.0181	99	9	1.1	0	0	0	76.7344	60.8738	1	0	0	0	0	1	0			0	0	0	1	1	1.1
169	5	2016-07-20	0	43	64.4654	90	1.0181	99	9	1.1	0	0	0	77.5988	64.2157	0	0	1	0	0	1	0			0	0	0	1	1	0.9
170	4	2013-03-20	0	61	66	89	1.00679	98	9	1.10112	0	0	0	81.4921	76.4086	0	0	0	0	0	0	1	4		0	0	0	1	1	0.9
171	3	2016-10-12	0	57	61	84	0.950226	93	9	1.10714	0	0	0	89.5865	81.2602	0	0	0	0	0	1	0			0	0	0	1	1	1.1732
172	4	2014-11-12	1	64	79	82	0.927602	91	9	1.10976	0	0	0	67.392	88.106	0	0	0	0	0	0	1	3		0	0	0	2	1	1.15
173	3	2016-07-25	0	50	70	79	0.893665	88	9	1.11392	0	0	0	71.4297	84.5218	1	0	0	0	0	0	0			1	0	0	2	1	1.13
174	5	2014-11-12	0	59	62	68	0.769231	77	9	1.13235	0	0	0	107.702	83.3296	1	0	0	0	0	0	0		1	1	0	0	1	1	0.79
175	6	2016-01-18	0	72	71	67	0.757919	76	9	1.13433	0	0	0	78.5417	68.9213	0	0	0	0	0	1	0			0	0	0	2	1	1.23
176	4	2016-09-02	1	72	70	60	0.678733	69	9	1.15	0	0	0	94.2961	98.4912	1	0	0	0	0	0	0			1	0	0	2	1	1.44
177	5	2015-08-31	0	67	64.4654	59	0.667421	68	9	1.15254	0	0	0	125.874	96.361	1	0	0	0	0	0	0		1	0	0	0	1	1	0.82
178	5	2013-05-17	0	68	58	58	0.656109	67	9	1.15517	0	0	0	130.567	94.8685	0	0	0	0	0	0	0	2		0	0	0	1	1	1.22
179	5	2012-11-12	0	69	59	53	0.599548	62	9	1.16981	0	0	0	145.83	108.319	0	0	0	0	0	1	0			0	0	0	1	1	1.1732
180	5	2014-10-08	0	7	46	48	0.542986	57	9	1.1875	0	0	0	159.582	84.1848	1	0	1	0	0	1	0		1	0	0	0	1	1	0.79
181	4	2016-07-29	0	42	46	47	0.531674	56	9	1.19149	0	0	0	171.675	103.537	1	0	0	0	0	0	0			0	0	0	1	1	1.1732
182	6	2016-11-23	1	77	57	232	2.62443	240	8	1.03448	0	0	0	25.3084	19.0768	0	0	0	0	0	0	0		1	0	0	0	1	1	1.23
183	5	2017-01-20	1	48	73	124	1.40271	132	8	1.06452	0	0	0	40.494	48.3226	0	0	0	0	0	1	0			0	0	0	2	1	1.29
184	7	2015-11-27	0	71	64.4654	93	1.05204	101	8	1.08602	0	0	0	71.0274	45.9903	1	0	0	0	0	0	1	4		0	0	0	1	1	1.1732
185	4	2015-10-10	0	58	69	88	0.995475	96	8	1.09091	0	0	0	61.1574	68.2876	1	0	0	0	0	0	0		1	1	0	0	2	1	1.1732
186	3	2014-09-17	0	62	61	78	0.882353	86	8	1.10256	0	0	0	97.8144	88.0503	1	0	0	0	0	0	0			0	0	0	1	1	1.12
187	5	2015-04-17	0	47	64	73	0.825792	81	8	1.10959	0	0	0	98.7618	78.4451	1	0	0	0	0	0	0			1	0	0	1	1	1
188	5	2015-03-25	0	67	61	71	0.803167	79	8	1.11268	0	0	0	103.867	82.9922	0	0	0	0	0	1	1	3		0	0	0	1	1	0.92
189	4	2016-01-06	0	7	64.4654	66	0.746606	74	8	1.12121	0	0	0	114.068	97.6831	0	0	0	0	0	1	0			0	0	0	1	1	1.12
190	5	2014-01-13	0	67	64.4654	46	0.520362	54	8	1.17391	0	0	0	169.302	128.779	1	0	0	0	0	1	0		1	1	0	0	1	1	1.1732
191	5	2015-06-24	1	65	90	126	1.42534	133	7	1.05556	0	0	0	39.3841	56.4796	1	0	0	0	0	1	0			1	0	0	2	1	1.13
192	4	2013-07-10	0	68	64.4654	121	1.36878	128	7	1.05785	0	0	0	57.7459	56.658	0	0	0	0	0	1	0			1	0	0	1	1	1.53
193	6	2014-06-09	1	66	58	107	1.21041	114	7	1.06542	0	0	0	62.5158	44.829	1	0	1	0	0	1	0	2		1	0	0	1	1	1.1
194	6	2010-06-30	0	53	64.4654	106	1.1991	113	7	1.06604	0	0	0	63.4406	51.315	1	0	1	0	0	0	0		1	1	0	1	1	1	1.69
195	5	2016-06-22	1	67	67	103	1.16516	110	7	1.06796	0	0	0	66.2937	57.8508	0	0	0	0	0	1	0			1	0	0	1	1	1.1732
196	4	2017-01-06	0	61	65	100	1.13122	107	7	1.07	0	0	0	70.7087	65.2984	1	1	0	0	0	0	0		1	1	0	1	1	1	1.05
197	6	2017-04-19	1	38	59	97	1.09729	104	7	1.07216	0	0	0	70.267	51.2709	1	0	0	0	0	1	0			0	0	0	1	1	1.21
198	6	2012-11-15	0	44	54	87	0.984163	94	7	1.08046	0	0	0	79.714	52.4763	0	0	0	0	0	1	0			0	0	0	1	1	0.83
199	6	2014-03-03	1	68	80	85	0.961538	92	7	1.08235	0	0	0	60.7113	67.3778	0	0	0	0	0	1	0			0	0	0	2	1	1.33
200	4	2015-05-18	0	47	64.4654	84	0.950226	91	7	1.08333	0	0	0	88.4771	82.9621	0	0	1	0	0	0	0			0	0	0	1	1	1.35
201	6	2016-08-31	1	77	52	80	0.904977	87	7	1.0875	0	0	0	86.7796	51.5347	1	0	0	0	0	0	0			0	0	0	1	1	1.28
202	6	2015-12-23	0	65	64.4654	80	0.904977	87	7	1.0875	0	0	0	87.847	68.2499	0	0	1	0	0	1	0			0	0	0	1	1	0.9
203	5	2014-12-29	0	63	60	70	0.791855	77	7	1.1	0	0	0	104.184	78.4211	1	0	0	0	0	0	0			0	0	0	1	1	1.1732
204	4	2016-02-17	1	65	50	69	0.780543	76	7	1.10145	0	0	0	107.758	71.0098	1	0	1	0	0	1	0			0	0	1	1	1	1.02
205	5	2014-06-09	0	36	64.4654	66	0.746606	73	7	1.10606	0	0	0	112.21	91.7658	1	0		0	0	1	0			0	0	0	1	1	1.04
206	5	2017-02-20	0	67	63	65	0.735294	72	7	1.10769	0	0	0	114.978	93.5307	0	0	0	0	0	1	1	3		0	0	0	1	1	0.98
207	4	2016-02-22	1	67	67	45	0.50905	52	7	1.15556	0	0	0	180.998	158.808	0	0	0	0	0	1	0			0	0	0	1	1	1.1732
208	6	2014-05-07	0	57	72	101	1.14253	107	6	1.05941	0	0	0	48.8153	45.8055	1	0	0	0	0	0	0			0	0	0	2	1	1.2
209	6	2015-08-28	0	61	46	95	1.07466	101	6	1.06316	0	0	0	71.0613	38.0547	0	0	0	0	0	1	0	2		0	0	0	1	1	1.1732
210	5	2015-05-27	0	68	63	93	1.05204	99	6	1.06452	0	0	0	75.1863	62.4223	1	0	0	0	0	1	0			1	0	0	1	1	1
211	4	2015-08-31	0	68	80	89	1.00679	95	6	1.06742	0	0	0	60.0248	76.7861	1	0	0	0	0	0	0			0	0	1	2	1	1.87
212	6	2015-11-11	1	60	56	88	0.995475	94	6	1.06818	0	0	0	77.615	49.9805	0	0	1	0	0	1	0	2		0	0	0	1	1	1.07
213	6	2016-01-11	1	34	73	88	0.995475	94	6	1.06818	0	0	0	58.1759	58.5798	0	0	0	0	0	1	0			0	0	0	2	1	1.1732
214	3	2017-02-27	0	31	74	86	0.972851	92	6	1.06977	0	0	0	64.9307	82.6299	0	0	0	0	0	0	0			0	0	0	2	1	1.37
215	5	2016-09-14	1	63	76	83	0.938914	89	6	1.07229	0	0	0	62.8291	67.8028	1	0	0	0	0	0	0			0	0	0	2	1	1.1732
216	6	2015-02-27	0	6	61	82	0.927602	88	6	1.07317	0	0	0	85.2096	62.3678	1	0	0	0	0	1	0			0	0	0	1	1	1.25
217	5	2014-06-27	1	67	55	82	0.927602	88	6	1.07317	0	0	0	85.7393	58.0089	0	0	0	0	0	1	0		1	1	0	0	1	1	1.24
218	5	2017-02-27	0	65	73	80	0.904977	86	6	1.075	0	0	0	65.4821	67.2033	0	0	0	0	0	1	1	3		0	0	0	2	1	1.33
219	4	2016-10-31	0	57	60	76	0.859729	82	6	1.07895	0	0	0	96.9256	78.9407	1	0	1	0	0	1	0		1	1	0	1	1	1	1.23
220	5	2014-06-05	0	44	64.4654	73	0.825792	79	6	1.08219	0	0	0	100.793	85.9606	1	1	1	0	0	1	0			0	0	0	1	1	1.29
221	5	2012-12-27	0	43	56	70	0.791855	76	6	1.08571	0	0	0	103.716	71.748	0	0	0	0	0	1	0			0	0	0	1	1	1.81
222	4	2015-05-13	0	57	65	70	0.791855	76	6	1.08571	0	0	0	106.156	91.5406	0	0	0	0	0	1	0			0	0	0	1	1	1.1732
223	5	2016-10-28	1	56	65	62	0.701357	68	6	1.09677	0	0	0	121.118	100.189	0	0	0	0	0	1	1	3		0	0	0	1	1	0.94
224	3	2013-05-17	1	64	64.4654	61	0.690045	67	6	1.09836	0	0	0	129.791	118.726	1	0	0	0	0	0	0			0	0	0	1	1	1.09
225	5	2016-07-08	0	43	53	57	0.644796	63	6	1.10526	0	0	0	131.551	83.6384	1	0	0	0	0	1	0			1	0	0	1	1	0.71
226	4	2012-08-13	1	59	64.4654	47	0.531674	53	6	1.12766	0	0	0	168.16	135.373	1	0	0	0	0	1	0		1	0	0	0	1	1	1.1732
227	6	2016-08-10	1	68	53	110	1.24434	115	5	1.04545	0	0	0	60.5376	39.7954	1	0	1	0	0	1	1	4		1	0	0	1	1	1
228	6	2016-02-03	0	36	64.4654	107	1.21041	112	5	1.04673	0	0	0	62.4371	49.4918	1	0	0	0	0	1	0			0	0	0	1	1	1.79
229	5	2016-10-12	0	65	54	88	0.995475	93	5	1.05682	0	0	0	78.9675	52.8687	1	0	0	0	0	1	0			0	0	0	1	1	0.77
230	4	2012-04-09	1	73	61.9	88	0.995475	93	5	1.05682	0	0	0	81.4512	69.1354	0	0	0	0	0	1	0			1	0	0	1	1	0.91
231	5	2015-03-30	0	74	58	85	0.961538	90	5	1.05882	0	0	0	83.1939	62.1769	0	0	0	0	0	1	1	3		1	0	0	1	1	1.59
232	5	2014-11-05	1	31	64.4654	82	0.927602	87	5	1.06098	0	0	0	87.0768	72.9215	0	0	0	0	0	1	0		1	0	0	0	1	1	1.13
233	6	2016-11-14	1	65	63	80	0.904977	85	5	1.0625	0	0	0	87.6774	66.0415	1	0	0	0	0	1	0			0	0	0	1	1	1.09
234	5	2016-03-28	1	41	55	80	0.904977	85	5	1.0625	0	0	0	89.7492	64.2323	0	0	1	0	0	1	1	3		0	0	0	1	1	1.68
235	5	2014-04-30	1	63	68	79	0.893665	84	5	1.06329	0	0	0	66.8432	65.2263	0	0	0	0	0	1	0			0	0	1	2	1	1.18
236	5	2014-06-20	0	25	60	75	0.848416	80	5	1.06667	0	0	0	96.6601	74.6516	0	0	0	0	0	0	0		2	0	0	1	1	1	1.5
237	3	2015-06-16	0	49	63	71	0.803167	76	5	1.07042	0	0	0	112.725	107.878	0	0	0	0	0	1	0			1	0	0	1	1	0.91
238	4	2015-03-30	0	65	69	70	0.791855	75	5	1.07143	0	0	0	81.0216	90.5681	1	0	1	0	0	1	0			0	0	0	2	1	1.95
239	5	2015-03-18	1	54	60	70	0.791855	75	5	1.07143	0	0	0	104.589	79.7243	0	1	0	0	0	0	1	3		0	0	0	1	1	1.4
240	4	2015-03-04	1	41	65	70	0.791855	75	5	1.07143	0	0	0	105.89	90.6941	0	0	0	0	0	1	0			0	0	0	1	1	1.08
241	4	2015-10-12	0	37	68	66	0.746606	71	5	1.07576	0	0	0	84.5952	87.424	1	0	0	0	0	1	0			0	0	0	2	1	1.32
242	4	2013-07-24	0	5	64.4654	66	0.746606	71	5	1.07576	0	0	0	115.688	102.395	0	0	0	0	0	1	0			0	0	0	1	1	1.16
243	4	2012-07-02	0	56	55	66	0.746606	71	5	1.07576	0	0	0	117.012	90.4071	0	0	0	0	0	0	0			1	0	1	1	1	0.99
244	3	2017-03-22	1	63	65	66	0.746606	71	5	1.07576	0	0	0	118.366	110.283	0	0	0	0	0	0	0		1	0	0	0	1	1	1.22
245	3	2012-12-24	1	6	67.7	64	0.723982	69	5	1.07812	0	0	0	92.0604	103.668	1	0	0	0	1	1	0		1	0	0	0	2	1	1.1732
246	7	2016-08-08	1	29	55	59	0.667421	64	5	1.08475	0	0	0	121.633	67.8602	1	0	0	0	1	0	0			0	0	0	1	1	1.51
247	5	2015-04-15	1	72	78	59	0.667421	64	5	1.08475	0	0	0	93.2907	98.5665	0	0	1	0	0	1	0	2		1	0	1	2	1	0.85
248	3	2015-12-14	0	68	65	59	0.667421	64	5	1.08475	0	0	0	135.224	124.583	0	0	0	0	0	0	0			0	0	0	1	1	1.03
249	5	2016-01-18	0	62	58	55	0.622172	60	5	1.09091	0	0	0	139.385	101.654	1	0	0	0	0	0	1	4		0	0	0	1	1	0.77
250	6	2014-12-01	1	65	55	54	0.61086	59	5	1.09259	0	0	0	136.581	80.7421	0	0	1	0	0	1	0	2		1	0	1	1	1	1.01
251	4	2015-02-04	1	66	53	48	0.542986	53	5	1.10417	0	0	0	164.876	110.779	1	0	0	0	0	1	0	2		1	0	0	1	1	1.1732
252	6	2017-02-06	1	65	54	44	0.497738	49	5	1.11364	0	0	0	172.948	97.1423	0	0	0	0	0	1	0		2	1	0	1	1	1	0.93
253	4	2015-05-11	0	26	58	42	0.475113	47	5	1.11905	0	0	0	196.413	148.229	1	0	0	0	0	1	0			0	0	0	1	1	0.87
254	4	2015-04-29	0	62	51	35	0.395928	40	5	1.14286	0	0	0	242.197	156.005	1	1	1	0	0	0	1		2	0	0	0	1	1	1.1732
255	6	2015-01-26	1	57	62	132	1.49321	136	4	1.0303	0	0	0	48.977	38.4798	1	0	1	0	0	0	0			0	0	0	1	1	1.31
256	6	2013-04-15	0	6	67	118	1.33484	122	4	1.0339	0	0	0	41.2321	38.8686	1	0	0	0	0	0	0	2		1	0	0	2	1	1.59
257	5	2016-03-30	0	71	68	115	1.3009	119	4	1.03478	0	0	0	43.5633	45.8541	1	0	0	0	0	1	0		1	1	0	0	2	1	1.39
258	5	2016-05-01	1	32	53	91	1.02941	95	4	1.04396	0	0	0	76.2141	50.9587	0	0	0	0	0	0	0			0	0	0	1	1	1.01
259	4	2016-08-19	1	6	64.4654	90	1.0181	94	4	1.04444	0	0	0	81.5926	77.1181	1	1	0	0	0	0	0			0	0	0	1	1	0.91
260	1	2015-03-11	0	66	75	85	0.961538	89	4	1.04706	0	0	0	77.5999	109.292	1	0	0	0	0	0	0			0	0	0	2	1	1.3
261	5	2012-10-15	0	46	76.3	83	0.938914	87	4	1.04819	0	0	0	62.6152	66.9481	0	0	1	0	0	0	0			0	0	0	2	1	1.04
262	3	2013-08-02	0	5	67	82	0.927602	86	4	1.04878	0	0	0	69.976	82.278	0	0	1	0	0	1	0			0	0	0	2	1	1.1
263	4	2014-12-15	1	46	70	81	0.91629	85	4	1.04938	0	0	0	66.4638	72.0397	1	0	1	0	0	1	0		1	1	0	0	2	1	1.1732
264	4	2016-04-11	1	62	48	77	0.871041	81	4	1.05195	0	0	0	96.826	65.331	1	0	0	0	0	0	1			0	0	0	1	1	1.1732
265	3	2015-10-23	0	63	69	76	0.859729	80	4	1.05263	0	0	0	75.1379	87.9296	1	0	1	0	0	1	1			0	0	0	2	1	1.08
266	6	2016-01-18	1	58	66	74	0.837104	78	4	1.05405	0	0	0	94.4059	68.3458	1	0	0	0	0	0	0			1	0	0	1	1	1.17
267	5	2015-01-12	0	69	79	72	0.81448	76	4	1.05556	0	0	0	74.0474	81.3316	1	0	0	0	0	1	0	2		1	0	0	2	1	1.2
268	4	2014-12-17	0	58	66	71	0.803167	75	4	1.05634	0	0	0	104.695	92.4777	1	0	0	0	0	1	0			0	0	0	1	1	1.37
269	4	2016-03-16	0	53	60	69	0.780543	73	4	1.05797	0	0	0	107.942	85.7499	0	0	0	0	0	1	0		1	0	0	0	1	1	0.98
270	4	2015-04-15	0	65	59	66	0.746606	70	4	1.06061	0	0	0	113.723	88.4362	1	0	0	0	0	0	0			1	0	0	1	1	1.6
271	3	2014-06-06	0	58	61	66	0.746606	70	4	1.06061	0	0	0	117.791	102.154	1	0	0	0	0	1	0			0	0	0	1	1	1.1732
272	6	2015-03-11	0	33	39	66	0.746606	70	4	1.06061	0	0	0	107.352	44.2975	0	0	0	0	0	0	0			0	0	0	1	1	1.15
273	6	2015-07-31	0	68	64	63	0.71267	67	4	1.06349	0	0	0	114.857	82.6647	0	0	0	0	0	0	0			0	0	0	1	1	1.15
274	5	2016-01-06	0	70	55	62	0.701357	66	4	1.06452	0	0	0	121.763	86.5239	1	0	0	0	1	0	0			1	0	1	1	1	0.95
275	3	2014-12-22	0	70	75	61	0.690045	65	4	1.06557	0	0	0	99.5228	126.71	0	0	0	0	0	1	0			0	0	0	2	1	0.98
276	4	2015-05-11	0	82	44	59	0.667421	63	4	1.0678	0	0	0	130.433	75.8042	1	0	0	0	0	0	0			1	0	0	1	1	1.02
277	4	2012-06-25	0	48	60	59	0.667421	63	4	1.0678	0	0	0	131.091	105.117	0	0	1	0	0	1	0	2		0	0	0	1	1	1.33
278	6	2014-04-09	1	61	62	58	0.656109	62	4	1.06897	0	0	0	126.336	86.9059	0	0	0	0	0	0	0			1	0	0	1	1	1
279	5	2015-02-04	1	53	64.4654	55	0.622172	59	4	1.07273	0	0	0	137.117	105.538	1	0	0	0	0	1	0			1	0	0	1	1	1.1732
280	5	2014-07-07	1	46	50	51	0.576923	55	4	1.07843	0	0	0	150.05	89.4533	0	0	1	0	0	1	0	2		0	0	0	1	1	1.44
281	6	2012-12-19	1	55	67	49	0.554299	53	4	1.08163	0	0	0	114.516	97.3473	0	0	1	0	0	1	0	2		0	0	0	2	1	1.34
282	4	2015-12-30	0	66	61	44	0.497738	48	4	1.09091	0	0	0	183.705	142.794	0	0	0	0	0	1	0			1	0	0	1	1	0.72
283	4	2012-08-15	1	53	64	42	0.475113	46	4	1.09524	0	0	0	197.746	166.787	1	0	1	0	0	1	0	1		1	0	0	1	1	1.04
284	5	2015-02-04	0	70	54	233	2.63575	236	3	1.01288	0	0	0	25.9703	21.0683	0	0	0	0	0	0	0	2		1	0	0	1	1	0.71
285	6	2015-07-29	0	35	56	138	1.56109	141	3	1.02174	0	0	0	46.2347	32.09	1	0	1	0	0	0	0			0	0	1	1	1	0.85
286	5	2014-12-31	1	57	62	121	1.36878	124	3	1.02479	0	0	0	54.9987	45.3769	1	0	0	0	0	1	0	2		1	0	0	1	1	1
287	5	2013-01-05	1	37	64.4654	100	1.13122	103	3	1.03	0	0	0	69.383	60.2618	1	0	0	0	0	0	0		1	1	0	0	1	1	0.93
288	4	2013-06-21	0	54	65	94	1.06335	97	3	1.03191	0	0	0	75.8676	69.2268	0	0	0	0	0	0	0			0	0	1	1	1	0.86
289	5	2015-02-25	1	62	80	91	1.02941	94	3	1.03297	0	0	0	57.5121	70.4057	0	0	0	0	0	1	0			0	0	0	2	1	1.1732
290	4	2017-01-13	0	62	62	81	0.91629	84	3	1.03704	0	0	0	89.8583	75.942	0	0	0	0	0	1	0			0	0	0	1	1	1
291	6	2016-05-16	1	42	63	77	0.871041	80	3	1.03896	0	0	0	90.5108	64.1148	0	0	0	0	0	1	0			0	0	0	1	1	0.93
292	4	2016-08-10	1	60	73	76	0.859729	79	3	1.03947	0	0	0	72.1965	82.7419	1	0	1	0	0	0	0			0	0	0	2	1	1.32
293	7	2016-11-30	1	43	54	75	0.848416	78	3	1.04	0	0	0	91.9235	51.2986	1	0	0	0	0	0	0			0	0	0	1	1	1.06
294	4	2012-06-13	1	65	65	75	0.848416	78	3	1.04	0	0	0	100.872	93.7785	0	0	0	0	0	1	0			0	0	0	1	1	1.27
295	2	2015-01-12	0	67	69	73	0.825792	76	3	1.0411	0	0	0	85.2697	106.71	0	0	0	0	0	1	0			1	0	0	2	1	1.24
296	5	2013-05-20	1	53	62	69	0.780543	72	3	1.04348	0	0	0	105.581	81.0308	0	0	0	0	0	1	0			0	0	0	1	1	1.1732
297	6	2015-05-29	1	53	54	65	0.735294	68	3	1.04615	0	0	0	110.345	66.1016	0	0	0	0	0	1	0			0	0	1	1	1	0.72
298	6	2016-06-03	1	73	60	63	0.71267	66	3	1.04762	0	0	0	113.726	73.1925	1	0	1	0	0	0	0			1	0	0	1	1	1.01
299	3	2016-11-07	0	67	57	62	0.701357	65	3	1.04839	0	0	0	128.073	104.731	1	0	1	0	0	0	0		2	0	0	0	1	1	1.72
300	6	2013-12-11	0	54	54	61	0.690045	64	3	1.04918	0	0	0	118.872	70.8947	0	0	0	0	0	0	0			0	0	0	1	1	0.94
301	5	2015-10-19	1	76	59	60	0.678733	63	3	1.05	0	0	0	124.127	88.8881	1	0	1	0	0	1	0			1	0	0	1	1	1.05
302	4	2016-06-01	0	58	56	59	0.667421	62	3	1.05085	0	0	0	129.292	93.528	0	0	0	0	0	1	0			0	0	0	1	1	0.99
303	5	2014-11-14	1	59	58	56	0.633484	59	3	1.05357	0	0	0	136.342	99.3437	0	0	0	0	0	0	0			0	0	0	1	1	1.1732
304	6	2014-05-21	0	66	57	55	0.622172	58	3	1.05455	0	0	0	134.07	83.3874	1	0	0	0	0	0	0			1	0	1	1	1	1.32
305	4	2014-12-19	0	66	58	50	0.565611	53	3	1.06	0	0	0	157.444	116.782	0	0	1	0	0	1	0	1	2	0	0	0	1	1	1.01
306	3	2016-11-11	1	69	54	38	0.429864	41	3	1.07895	0	0	0	223.376	158.283	0	0	0	0	0	0	0			0	0	0	1	1	0.87
307	3	2015-06-05	1	65	67	38	0.429864	41	3	1.07895	0	0	0	228.955	208.594	0	0	0	0	0	1	0			0	0	0	1	1	1.1732
308	5	2015-01-19	0	55	70	147	1.6629	149	2	1.01361	0	0	0	32.6404	36.0546	1	0	0	0	0	0	0			0	0	0	2	1	1.1732
309	7	2016-09-14	0	59	97	143	1.61765	145	2	1.01399	0	0	0	31.9611	37.1543	0	0	1	0	0	1	0		1	1	0	0	2	1	1.03
310	6	2014-11-17	1	60	65	133	1.50452	135	2	1.01504	0	0	0	48.171	38.2975	0	0	1	0	0	0	0			0	0	0	1	1	1.14
311	5	2016-05-18	1	65	76	104	1.17647	106	2	1.01923	0	0	0	48.7757	55.9213	1	0	0	0	0	1	0			0	0	0	2	1	1.61
312	3	2012-03-28	1	49	75	103	1.16516	105	2	1.01942	0	0	0	52.3412	68.5752	1	0	1	0	0	1	0			0	0	0	2	1	1.24
313	5	2016-03-14	0	56	62	100	1.13122	102	2	1.02	0	0	0	68.9891	56.5745	0	0	0	0	0	0	0			0	0	0	1	1	1
314	5	2015-07-03	1	3	54	97	1.09729	99	2	1.02062	0	0	0	70.9397	49.1618	0	0	0	0	0	0	0	2		1	0	0	1	1	0.98
315	6	2016-06-17	0	63	72	95	1.07466	97	2	1.02105	0	0	0	52.7953	51.0085	1	0	0	0	0	0	0			0	0	0	2	1	1.1732
316	3	2014-05-12	0	74	78	93	1.05204	95	2	1.02151	0	0	0	60.0571	83.006	1	0	0	0	0	1	0			0	0	0	2	1	1.1732
317	6	2016-01-20	1	64	69	87	0.984163	89	2	1.02299	0	0	0	58.6166	54.3192	0	0	0	0	0	1	0		1	0	0	0	2	1	1.6
318	7	2016-08-17	0	61	58	85	0.961538	87	2	1.02353	0	0	0	79.2163	47.1336	0	0	0	0	0	1	0			0	0	0	1	1	1.07
319	4	2016-03-23	0	69	80	80	0.904977	82	2	1.025	0	0	0	69.3289	91.4089	0	0	0	0	0	1	0			0	0	0	2	1	0.95
320	5	2016-11-18	1	41	59	79	0.893665	81	2	1.02532	0	0	0	91.2601	70.4015	1	0	0	0	0	1	0	2		0	0	0	1	1	0.92
321	5	2015-01-14	0	61	63	79	0.893665	81	2	1.02532	0	0	0	91.2931	75.2845	0	0	0	0	0	1	0			1	0	0	1	1	0.89
322	5	2016-02-26	0	75	70	77	0.871041	79	2	1.02597	0	0	0	68.8821	69.0317	1	0	0	0	0	0	0	2		1	0	0	2	1	1.57
323	5	2017-02-13	0	51	89	72	0.81448	74	2	1.02778	0	0	0	73.8167	90.2483	1	0	0	0	0	0	0			0	0	0	2	1	1.84
324	7	2016-10-28	0	69	53	66	0.746606	68	2	1.0303	0	0	0	106.859	58.4137	0	0	0	0	0	1	0			0	0	0	1	1	0.86
325	2	2013-04-03	0	62	56	64	0.723982	66	2	1.03125	0	0	0	130.648	112.01	0	1	0	0	0	1	0			0	0	0	1	1	0.84
326	5	2015-12-07	1	57	60	62	0.701357	64	2	1.03226	0	0	0	121.087	92.3877	0	0	0	0	0	0	1	3		0	0	0	1	1	0.51
327	5	2015-05-04	0	64	65	57	0.644796	59	2	1.03509	0	0	0	130.138	97.4698	0	0	0	0	0	1	0		1	1	0	0	1	1	1.01
328	3	2016-01-25	0	66	55	57	0.644796	59	2	1.03509	0	0	0	144.166	115.5	0	0	0	0	0	1	0			0	0	0	1	1	1
329	4	2013-05-06	1	57	64.4654	54	0.61086	56	2	1.03704	0	0	0	145.423	124.029	0	0	0	0	0	0	0			0	0	0	1	1	1.1732
330	4	2014-12-03	1	59	67	47	0.531674	49	2	1.04255	0	0	0	125.626	122.513	1	0	1	0	0	1	1	4		0	0	0	2	1	1.29
331	7	2015-07-22	1	27	45	113	1.27828	114	1	1.00885	0	0	0	57.3194	28.5125	1	0	1	0	0	0	0			0	0	0	1	1	1.25
332	6	2016-06-20	0	58	55	107	1.21041	108	1	1.00935	0	0	0	62.2074	41.3795	0	0	0	0	0	1	0			0	0	0	1	1	0.95
333	3	2016-11-07	1	58	69	94	1.06335	95	1	1.01064	0	0	0	59.4299	72.9599	0	0	1	0	0	0	0			0	0	0	2	1	0.88
334	7	2017-01-25	0	40	45	93	1.05204	94	1	1.01075	0	0	0	71.0039	32.0204	1	0	1	0	0	1	1	3		0	0	0	1	1	1.71
335	4	2015-08-17	1	66	82	89	1.00679	90	1	1.01124	0	0	0	61.4772	84.9175	0	0	1	0	0	1	0		1	1	0	0	2	1	1.08
336	5	2015-10-21	1	52	60	87	0.984163	88	1	1.01149	0	0	0	80.9239	62.6149	1	0		0	0	0	0		1	1	0	0	1	1	1.4
337	4	2017-02-22	0	77	62	84	0.950226	85	1	1.0119	0	0	0	86.2016	73.3415	1	0	0	0	0	1	1	3	2	0	0	0	1	1	1.78
338	4	2016-07-15	0	62	59	80	0.904977	81	1	1.0125	0	0	0	91.9456	75.4009	1	0	0	0	0	1	0			0	0	0	1	1	1.1732
339	4	2017-02-13	1	54	70	79	0.893665	80	1	1.01266	0	0	0	69.1023	76.5566	0	0	0	0	0	1	0			0	0	0	2	1	1.42
340	6	2016-01-08	0	62	63	78	0.882353	79	1	1.01282	0	0	0	89.8972	66.2433	1	0	0	0	0	0	0			0	0	0	1	1	1.07
341	3	2016-06-01	0	52	62	78	0.882353	79	1	1.01282	0	0	0	100.85	96.0819	1	0	0	0	0	1	0			1	0	1	1	1	0.87
342	5	2016-01-29	1	68	64	77	0.871041	78	1	1.01299	0	0	0	92.4484	72.8351	1	0	1	0	0	0	0			1	0	0	1	1	1.59
343	4	2016-06-06	0	64	60	77	0.871041	78	1	1.01299	0	0	0	95.1762	77.0453	0	0	0	0	0	0	0			0	0	0	1	1	1.83
344	4	2013-01-21	0	64	68	77	0.871041	78	1	1.01299	0	0	0	71.0033	75.6596	0	0	1	0	0	1	0			0	0	0	2	1	1.24
345	5	2016-07-15	1	60	61	73	0.825792	74	1	1.0137	0	0	0	97.995	72.0724	0	0	0	0	0	0	0			0	0	0	1	1	0.85
346	5	2012-05-21	0	38	64.4654	73	0.825792	74	1	1.0137	0	0	0	99.9899	83.3139	0	0	0	0	0	0	0			0	0	0	1	1	1.1732
347	4	2016-06-17	0	59	64.4654	73	0.825792	74	1	1.0137	0	0	0	103.737	94.6642	0	0	0	0	0	0	0		2	0	0	0	1	1	0.89
348	4	2015-06-16	0	70	70	72	0.81448	73	1	1.01389	0	0	0	78.5871	89.8455	1	0	1	0	0	1	0		1	1	0	0	2	1	1.63
349	5	2016-03-09	1	66	60	71	0.803167	72	1	1.01408	0	0	0	101.341	73.425	1	0	0	0	0	1	0			1	0	0	1	1	1.34
350	6	2015-08-31	1	63	68	71	0.803167	72	1	1.01408	0	0	0	74.2438	66.2555	0	0	0	0	0	1	0			0	0	0	2	1	1.15
351	6	2015-10-26	0	74	52	70	0.791855	71	1	1.01429	0	0	0	102.327	62.4301	1	0	0	0	0	1	0			0	0	0	1	1	1.29
352	5	2015-06-16	0	34	64	69	0.780543	70	1	1.01449	0	0	0	106.735	87.5946	1	0	0	0	0	0	0			0	0	0	1	1	0.91
353	6	2015-12-21	1	74	63	68	0.769231	69	1	1.01471	0	0	0	104.292	71.8651	1	1	0	0	0	1	0			0	0	0	1	1	1.06
354	5	2014-01-15	1	68	81	66	0.746606	67	1	1.01515	0	0	0	84.0456	101.685	0	0	0	0	0	1	0			1	0	0	2	1	1.37
355	4	2016-03-21	0	62	48	63	0.71267	64	1	1.01587	0	0	0	122.834	81.4226	0	0	0	0	0	1	0			0	0	0	1	1	1.49
356	3	2013-04-15	0	6	73	63	0.71267	64	1	1.01587	0	0	0	93.1636	111.812	0	0	1	0	0	1	0			1	0	0	2	1	0.96
357	5	2015-10-27	0	65	57	61	0.690045	62	1	1.01639	0	0	0	122.022	85.2027	1	0	0	0	0	0	0	1		1	0	0	1	1	1.24
358	4	2015-07-27	0	62	64	59	0.667421	60	1	1.01695	0	0	0	132.534	116.029	1	0	0	0	0	1	0			0	0	0	1	1	0.97
359	6	2015-02-09	0	76	64.4654	57	0.644796	58	1	1.01754	0	0	0	129.876	95.6943	0	0	1	0	0	1	1	3		0	0	0	1	1	1.1732
360	5	2012-11-15	1	69	48	55	0.622172	56	1	1.01818	0	0	0	136.193	76.1627	1	0	1	0	0	0	0			0	0	0	1	1	2.15
361	4	2015-12-09	1	73	59	55	0.622172	56	1	1.01818	0	0	0	141.937	110.331	1	0	0	0	0	0	0			0	0	0	1	1	0.89
362	3	2014-02-17	1	6	64.4654	49	0.554299	50	1	1.02041	0	0	0	168.418	150.731	1	0	0	0	0	0	0		1	1	0	0	1	1	1.1732
363	6	2015-03-25	1	62	62	44	0.497738	45	1	1.02273	0	0	0	174.053	115.572	0	0	0	0	0	0	0			0	0	0	1	1	1.1732
364	5	2014-11-14	0	63	43	44	0.497738	45	1	1.02273	0	0	0	176.765	86.5947	0	0	0	0	0	0	0			0	0	0	1	1	2.04
365	5	2015-07-01	0	38	49	201	2.27376	201	0	1	0	0	0	30.9938	22.7688	1	1	0	0	0	1	0			0	0	0	1	1	1.79
366	5	2015-01-04	0	47	64.4654	139	1.5724	139	0	1	0	0	0	47.648	44.1011	0	0	0	0	0	0	0		1	0	0	0	1	1	1.04
367	5	2014-12-01	0	67	67	98	1.1086	98	0	1	0	0	0	71.5656	65.894	0	0	1	0	0	1	0			1	0	0	1	1	1.1732
368	6	2015-07-29	0	61	54	95	1.07466	95	0	1	0	0	0	70.9717	44.3421	1	0	1	0	0	0	0			0	0	0	1	1	1.09
369	6	2014-02-07	1	64	69	90	1.0181	90	0	1	0	0	0	56.8767	55.0865	0	0	0	0	0	0	0			0	0	0	2	1	1.49
370	5	2013-05-15	0	56	69	90	1.0181	90	0	1	0	0	0	57.419	57.6862	0	0	0	0	0	1	0	2		1	0	0	2	1	1.61
371	5	2016-01-13	0	69	65	84	0.950226	84	0	1	0	0	0	85.492	74.5581	1	0	1	0	0	1	0		2	1	0	0	1	1	1.25
372	3	2013-04-24	0	67	68	81	0.91629	81	0	1	0	0	0	68.9855	78.8098	1	0	0	0	0	1	0			0	0	0	2	1	1.98
373	5	2013-06-24	1	52	67	81	0.91629	81	0	1	0	0	0	65.4726	64.9649	0	0	0	0	0	1	1	3		0	0	0	2	1	1.1
374	6	2015-08-07	1	78	53	80	0.904977	80	0	1	0	0	0	87.6638	55.5142	0	0	0	0	0	1	0		1	1	0	0	1	1	1.1732
375	6	2016-07-13	0	51	46	75	0.848416	75	0	1	0	0	0	94.4721	51.4788	1	0	0	0	0	1	0			1	0	0	1	1	1.1732
376	5	2015-04-15	1	60	71	75	0.848416	75	0	1	0	0	0	72.0018	76.2888	1	0	0	0	0	1	0			0	0	0	2	1	1.3
377	5	2011-10-20	0	78	54.7	74	0.837104	74	0	1	0	0	0	96.7947	64.7998	1	0	1	0	0	0	0			0	0	0	1	1	1.44
378	6	2016-04-01	0	55	48	72	0.81448	72	0	1	0	0	0	98.2988	53.7778	0	0	0	0	0	1	0			1	0	0	1	1	1.02
379	6	2014-10-11	1	62	56	69	0.780543	69	0	1	0	0	0	103.47	66.2521	1	0	0	0	0	1	1	3		1	0	1	1	1	1.05
380	4	2016-03-04	1	73	57	69	0.780543	69	0	1	0	0	0	109.163	84.7247	1	0	1	0	0	0	0			0	0	0	1	1	1.29
381	5	2014-10-27	1	71	64	69	0.780543	69	0	1	0	0	0	106.871	88.0439	0	0	0	0	0	1	0		1	1	0	0	1	1	0.94
382	6	2014-05-15	1	65	62	68	0.769231	68	0	1	0	0	0	104.797	72.7455	0	0	0	0	0	1	0			0	0	0	1	1	1.1732
383	4	2013-06-26	0	63	58	68	0.769231	68	0	1	0	0	0	110.217	85.3328	0	1	1	0	0	0	0	2		0	0	0	1	1	1.16
384	4	2017-03-10	1	39	75	67	0.757919	67	0	1	0	0	0	85.185	102.72	0	0	1	0	0	1	0			1	0	0	2	1	1.01
385	5	2013-03-27	1	39	64.4654	65	0.735294	65	0	1	0	0	0	112.921	88.7539	1	1	0	0	0	1	1	3		0	0	0	1	1	1.18
386	5	2015-03-09	1	76	64.4654	65	0.735294	65	0	1	0	0	0	114.537	94.2785	1	0	0	0	0	0	1	4		0	0	0	1	1	1.25
387	4	2015-09-11	0	69	56	64	0.723982	64	0	1	0	0	0	117.516	85.706	1	0	0	0	0	1	0		1	0	0	0	1	1	0.86
388	3	2015-01-09	0	75	64	63	0.71267	63	0	1	0	0	0	125.677	115.603	1	0	0	0	0	1	0			0	0	1	1	1	1.11
389	6	2014-01-08	1	6	59	61	0.690045	61	0	1	0	0	0	118.387	75.6533	1	0	0	0	0	1	1	4		0	0	1	1	1	1.35
390	3	2016-04-22	0	68	70	60	0.678733	60	0	1	0	0	0	98.4469	112.251	0	0	0	0	0	1	1	4	2	0	0	0	2	1	1.07
391	3	2016-11-30	1	76	88	59	0.667421	59	0	1	0	0	0	102.843	151.9	0	0	0	0	0	1	1			0	0	0	2	1	1.44
392	6	2014-04-18	1	63	71	58	0.656109	58	0	1	0	0	0	94.2847	87.2391	1	0	1	0	0	1	0			0	0	0	2	1	1.33
393	5	2016-10-09	0	75	64	57	0.644796	57	0	1	0	0	0	132.482	104.14	1	0	0	0	0	1	0			0	0	0	1	1	0.88
394	4	2017-03-24	1	44	48	56	0.633484	56	0	1	0	0	0	141.892	93.8349	0	1	1	0	0	1	0		1	1	0	1	1	1	1.33
395	2	2016-10-09	1	62	57	54	0.61086	54	0	1	0	0	0	155.993	130.639	1	0	1	0	0	1	0		3	0	0	0	1	1	1.22
396	6	2016-09-30	1	58	36	53	0.599548	53	0	1	0	0	0	138.14	50.5975	1	0	0	1	0	1	0	1		1	0	0	1	1	1.06
397	4	2016-11-16	1	66	39	52	0.588235	52	0	1	0	0	0	149.918	74.5169	1	1	0	0	0	1	0		1	1	0	0	1	1	1.01
398	4	2016-10-24	0	63	63	50	0.565611	50	0	1	0	0	0	160.524	135.017	0	0	0	0	0	1	1	4		1	0	0	1	1	1.18
399	5	2014-05-07	0	53	43	45	0.50905	45	0	1	0	0	0	172.498	85.2554	1	0	0	0	0	0	0			0	0	1	1	1	1.26
400	6	2015-12-11	0	76	53	119	1.34615	118	-1	0.991597	0	0	0	54.3658	33.3593	1	0	1	0	0	1	0			1	0	0	1	1	1.6
401	5	2010-10-27	0	5	61	113	1.27828	112	-1	0.99115	0	0	0	59.6244	48.207	0	0	0	0	0	1	0			0	0	0	1	1	1.13
402	4	2017-02-24	0	50	87	108	1.22172	107	-1	0.990741	0	0	0	48.7068	72.1517	1	0	0	0	0	1	0			0	0	0	2	1	1.45
403	5	2016-02-29	1	63	74	107	1.21041	106	-1	0.990654	0	0	0	47.0891	52.3575	1	0	0	0	0	1	0			0	0	0	2	1	1.43
404	4	2016-03-07	0	54	51	101	1.14253	100	-1	0.990099	0	0	0	69.8042	50.4789	1	0	0	0	0	1	0			0	0	0	1	1	0.91
405	6	2013-12-11	1	76	58	100	1.13122	99	-1	0.99	0	0	0	66.464	43.4934	1	0	1	0	0	0	0			0	0	0	1	1	1.3
406	6	2015-10-23	0	74	77	94	1.06335	93	-1	0.989362	0	0	0	53.6813	56.5247	0	0	0	0	0	0	0	2		1	0	0	2	1	1.41
407	4	2017-03-06	0	49	60	93	1.05204	92	-1	0.989247	0	0	0	76.3124	63.0827	1	0	1	0	0	0	0			0	0	0	1	1	1.1732
408	4	2017-02-15	0	50	68	88	0.995475	87	-1	0.988636	0	0	0	61.96	70.1348	0	1	0	0	0	0	1	4		0	0	0	2	1	1.34
409	5	2016-08-29	0	56	56	87	0.984163	86	-1	0.988506	0	0	0	81.125	59.075	1	0	0	0	0	1	0			1	0	0	1	1	1.42
410	6	2016-09-02	1	50	66	85	0.961538	84	-1	0.988235	0	0	0	81.6419	64.6569	1	0	0	0	0	1	0	2		1	0	0	1	1	1.18
411	7	2015-04-24	0	74	65	85	0.961538	84	-1	0.988235	0	0	0	79.5719	54.5379	0	0	0	0	0	1	0			0	0	0	1	1	1.17
412	5	2016-02-22	0	43	59	85	0.961538	84	-1	0.988235	0	0	0	83.6398	64.7058	0	0	0	0	0	1	0			1	0	1	1	1	0.99
413	4	2016-11-02	1	67	70	85	0.961538	84	-1	0.988235	0	0	0	64.9314	76.2504	0	0	0	0	0	1	0			0	0	0	2	1	1.18
414	5	2014-06-27	0	61	56	84	0.950226	83	-1	0.988095	0	0	0	83.2281	57.1169	0	0	0	0	0	1	0			1	0	0	1	1	1.4
415	3	2015-04-30	0	5	64	83	0.938914	82	-1	0.987952	0	0	0	93.8409	93.1417	1	0	1	0	0	1	0			1	0	0	1	1	1.23
416	5	2016-05-11	0	53	68	83	0.938914	82	-1	0.987952	0	0	0	62.8048	60.5532	0	0	0	0	0	1	0	2		1	0	0	2	1	1.36
417	5	2014-12-19	1	48	66	81	0.91629	80	-1	0.987654	0	0	0	86.9871	70.5688	0	0	0	0	0	1	0		2	0	0	0	1	1	0.8
418	5	2016-09-26	0	65	56	80	0.904977	79	-1	0.9875	0	0	0	88.4673	61.3667	0	0	0	0	0	1	0			0	0	0	1	1	1.44
419	4	2015-01-07	0	66	62	79	0.893665	78	-1	0.987342	0	0	0	95.1749	85.3672	1	0	0	0	0	1	0			1	0	0	1	1	1.1732
420	4	2016-06-06	0	72	55	76	0.859729	75	-1	0.986842	0	0	0	97.9277	74.933	1	0	0	0	0	1	0			0	0	0	1	1	1.33
421	5	2016-03-21	1	67	65	72	0.81448	71	-1	0.986111	0	0	0	101.28	84.0934	1	0	0	0	0	0	0			0	0	0	1	1	1.21
422	4	2014-12-10	0	73	48	72	0.81448	71	-1	0.986111	0	0	0	103.347	67.0737	1	0	0	0	0	0	0			1	0	0	1	1	1.1732
423	4	2015-12-14	1	50	64.4654	72	0.81448	71	-1	0.986111	0	0	0	105.544	96.3645	1	0	0	0	0	1	1	3		1	0	0	1	1	0.8
424	5	2016-07-25	1	56	86	72	0.81448	71	-1	0.986111	0	0	0	75.3749	95.7442	0	0	1	0	0	1	0	2		0	0	0	2	1	1.26
425	5	2016-08-31	0	65	49	71	0.803167	70	-1	0.985915	0	0	0	101.723	61.041	0	0	1	0	0	1	0			0	0	0	1	1	0.51
426	5	2014-05-05	0	74	52	70	0.791855	69	-1	0.985714	0	0	0	102.985	64.4592	1	0	0	0	0	1	0	2		1	0	1	1	1	0.99
427	5	2017-02-20	1	68	72	69	0.780543	68	-1	0.985507	0	0	0	78.886	82.4168	1	0	0	0	0	0	0	2		1	0	0	2	1	1.1732
428	6	2017-03-06	1	50	64.4654	67	0.757919	66	-1	0.985075	0	0	0	78.3447	61.6069	0	0	0	0	0	1	0			0	0	0	2	1	1.05
429	6	2016-06-17	0	68	47	65	0.735294	64	-1	0.984615	0	0	0	109.941	56.3167	0	0	1	0	0	0	0			1	0	1	1	1	0.97
430	5	2017-02-16	1	60	68	65	0.735294	64	-1	0.984615	0	0	0	83.7439	79.3887	0	0	1	0	0	1	0			0	0	0	2	1	1.39
431	4	2016-09-21	1	70	63	65	0.735294	64	-1	0.984615	0	0	0	118.291	103.074	0	0	1	0	0	0	0		3	0	0	0	1	1	1.12
432	5	2017-03-17	0	64	64.4654	62	0.701357	61	-1	0.983871	0	0	0	88.6338	79.6976	1	1	1	0	0	1	0			0	0	0	2	1	1.1732
433	6	2017-01-18	1	56	90	60	0.678733	59	-1	0.983333	0	0	0	90.4939	105.835	0	0	1	0	0	0	0			1	0	0	2	1	1.13
434	5	2012-10-18	1	67	55	59	0.667421	58	-1	0.983051	0	0	0	126.521	84.1565	0	0	0	0	0	1	0			0	0	0	1	1	1.17
435	3	2015-12-16	1	65	60	59	0.667421	58	-1	0.983051	0	0	0	138.307	121.284	0	0	0	0	0	1	0			0	0	0	1	1	1.58
436	5	2016-11-21	1	57	90	58	0.656109	57	-1	0.982759	0	0	0	97.4452	127.994	1	0	0	0	0	1	0		1	1	0	0	2	1	1.03
437	5	2015-12-11	0	60	59	58	0.656109	57	-1	0.982759	0	0	0	129.922	94.5709	0	0	1	0	0	1	0			0	0	0	1	1	1.24
438	3	2015-01-09	0	67	56	57	0.644796	56	-1	0.982456	0	0	0	140.726	111.123	1	0	1	0	0	0	0	2		0	0	0	1	1	1.95
439	3	2012-07-30	1	77	61.5	57	0.644796	56	-1	0.982456	0	0	0	140.016	120.436	0	0	0	0	0	1	0			0	0	0	1	1	1.31
440	5	2015-07-01	1	71	59	55	0.622172	54	-1	0.981818	0	0	0	138.218	99.9819	1	0	0	0	0	0	0		1	0	0	0	1	1	1.49
441	3	2015-09-23	1	68	70	50	0.565611	49	-1	0.98	0	0	0	124.287	142.083	0	0	0	0	0	1	0			1	0	0	2	1	1.3
442	5	2016-08-26	1	75	55	47	0.531674	46	-1	0.978723	0	0	0	163.374	102.404	0	0	0	0	0	1	0			1	0	1	1	1	1.61
443	5	2016-12-07	0	69	87	116	1.31222	114	-2	0.982759	0	0	0	43.7877	61.8533	0	0	0	0	0	1	0			0	0	0	2	1	1.1732
444	6	2016-02-19	1	59	78	108	1.22172	106	-2	0.981481	0	0	0	45.7864	50.1481	0	1	0	0	0	1	0			1	0	0	2	1	1.47
445	5	2011-08-28	1	69	78.7	103	1.16516	101	-2	0.980583	0	0	0	50.1029	62.4266	0	0	0	0	0	1	0	2		1	0	0	2	1	1.15
446	2	2015-02-27	0	50	63	95	1.07466	93	-2	0.978947	0	0	0	81.2775	82.0657	1	0	0	0	0	0	0			0	0	0	1	1	0.84
447	6	2016-09-30	0	61	60	95	1.07466	93	-2	0.978947	0	0	0	70.8143	48.6168	0	0	0	0	0	0	0			1	0	0	1	1	0.73
448	5	2015-05-04	0	74	70	86	0.972851	84	-2	0.976744	0	0	0	61.563	65.936	0	0	0	0	0	1	0			0	0	0	2	1	1.1732
449	6	2015-02-04	1	68	69	85	0.961538	83	-2	0.976471	0	0	0	60.5769	57.4495	0	0	1	0	0	1	0			0	0	0	2	1	1.39
450	3	2016-05-27	0	60	69	84	0.950226	82	-2	0.97619	0	0	0	67.1274	80.1026	1	0	1	0	0	1	0		1	1	0	0	2	1	0.9
451	6	2016-05-23	0	71	53	83	0.938914	81	-2	0.975904	0	0	0	83.3846	51.3726	1	0	0	0	0	0	0			0	0	0	1	1	1.52
452	5	2014-04-08	0	63	60	81	0.91629	79	-2	0.975309	0	0	0	88.918	70.6293	1	0	0	0	0	0	0	2		0	0	0	1	1	1.95
453	2	2016-04-20	0	68	65	80	0.904977	78	-2	0.975	0	0	0	99.9871	102.217	1	0	1	0	0	1	0			0	0	0	1	1	0.73
454	6	2014-07-16	0	46	50	77	0.871041	75	-2	0.974026	0	0	0	90.6655	51.3937	1	0	1	1	0	0	0		4	1	0	0	1	1	1.1732
455	5	2016-01-13	0	57	62	77	0.871041	75	-2	0.974026	0	0	0	92.8784	72.092	1	0	0	0	0	0	0			1	0	0	1	1	1.1732
456	5	2013-08-02	0	83	61	77	0.871041	75	-2	0.974026	0	0	0	93.0238	71.4302	0	0	0	0	0	0	0			1	0	0	1	1	1.08
457	6	2016-09-26	0	54	65	76	0.859729	74	-2	0.973684	0	0	0	92.4257	69.2933	1	0	0	0	0	0	0			0	0	0	1	1	1.1732
458	3	2016-12-19	1	34	89	76	0.859729	74	-2	0.973684	0	0	0	75.3252	114.12	1	0	0	0	0	1	0			0	0	0	2	1	1.1732
459	3	2013-06-24	0	62	59	76	0.859729	74	-2	0.973684	0	0	0	102.073	90.183	0	0	0	0	0	1	1			0	0	1	1	1	1.1732
460	5	2013-05-10	0	7	50	75	0.848416	73	-2	0.973333	0	0	0	96.2889	61.2072	0	1	1	0	0	0	1	3		1	0	0	1	1	1.14
461	5	2016-10-17	1	62	62	73	0.825792	71	-2	0.972603	0	0	0	100.113	80.5247	1	0	0	0	0	1	0			0	0	0	1	1	0.63
462	5	2016-11-14	1	70	62	71	0.803167	69	-2	0.971831	0	0	0	102.804	80.9337	0	0	0	0	0	0	0			0	0	0	1	1	1.05
463	5	2015-05-29	0	61	37	69	0.780543	67	-2	0.971014	0	0	0	106.925	51.0032	0	0	1	0	0	0	0		2	0	0	0	1	1	0.8
464	5	2015-12-21	1	70	67	62	0.701357	60	-2	0.967742	0	0	0	89.0559	84.5675	1	0	0	0	0	0	0			0	0	0	2	1	1.1732
465	2	2016-05-04	0	68	65	62	0.701357	60	-2	0.967742	0	0	0	132.681	129.142	1	0	0	0	0	0	0			0	0	0	1	1	0.78
466	6	2017-02-13	0	60	75	62	0.701357	60	-2	0.967742	0	0	0	87.4599	87.0179	0	0	0	0	0	1	1	4		0	0	0	2	1	1.17
467	3	2015-01-04	0	64	73	62	0.701357	60	-2	0.967742	0	0	0	93.9934	110.788	0	0	0	0	0	1	0			0	0	0	2	1	1.16
468	4	2014-12-08	0	28	69	61	0.690045	59	-2	0.967213	0	0	0	92.1047	93.9499	1	0	0	0	0	1	0			0	0	1	2	1	1.31
469	4	2016-01-12	0	66	52	55	0.622172	53	-2	0.963636	0	0	0	139.93	92.4957	1	0	0	0	0	1	1	3		0	0	0	1	1	1.28
470	6	2015-05-08	0	75	70	52	0.588235	50	-2	0.961538	0	0	0	106	91.4237	1	0	0	0	0	1	0			0	0	0	2	1	1.79
471	4	2017-03-08	1	37	52	51	0.576923	49	-2	0.960784	0	0	0	158.091	111.675	1	0	0	0	0	1	0			0	0	0	1	1	1.23
472	4	2013-01-17	1	74	52.8	49	0.554299	47	-2	0.959184	0	0	0	162.441	111.421	1	0	0	0	0	1	0			1	0	0	1	1	1.1732
473	4	2016-04-26	0	70	63	49	0.554299	47	-2	0.959184	0	0	0	164.143	137.353	1	0	0	0	0	0	0			0	0	0	1	1	1.01
474	5	2012-04-23	1	72	56	42	0.475113	40	-2	0.952381	0	0	0	188.683	124.294	0	0	1	0	0	1	0		1	1	0	0	1	1	0.93
475	4	2015-11-27	1	66	71	36	0.40724	34	-2	0.944444	0	0	0	174.688	181.683	1	0	0	0	0	1	0			0	0	0	2	1	2.13
476	5	2014-10-13	0	60	57	68	0.769231	65	-3	0.955882	0	0	0	107.218	75.0953	1	1	0	0	0	1	0		3	1	1	0	1	1	1.34
477	5	2014-06-23	0	66	63	162	1.83258	159	-3	0.981481	0	0	0	39.0467	33.4987	1	0	0	0	0	1	0			0	0	0	1	1	1.19
478	5	2012-09-12	1	53	64.4654	153	1.73077	150	-3	0.980392	0	0	0	42.4966	39.4747	0	0	0	0	0	1	0			0	0	0	1	1	1.1732
479	4	2016-10-24	1	56	56	136	1.53846	133	-3	0.977941	0	0	0	50.8586	44.8144	1	0	0	0	0	0	0			1	0	0	1	1	0.91
480	7	2016-03-16	1	52	60	132	1.49321	129	-3	0.977273	0	0	0	47.779	31.9329	1	1	1	0	0	1	0			1	0	0	1	1	1.31
481	6	2013-03-01	0	33	64.4654	128	1.44796	125	-3	0.976562	0	0	0	51.1419	42.9561	1	0	0	0	0	1	0			0	0	0	1	1	1.82
482	6	2016-06-08	1	69	58	122	1.38009	119	-3	0.97541	0	0	0	53.8592	39.805	0	0	0	0	0	1	0			1	0	0	1	1	1.18
483	6	2013-03-27	0	62	62	110	1.24434	107	-3	0.972727	0	0	0	60.1422	44.9017	1	0	0	0	0	0	0			1	0	1	1	1	1.1732
484	6	2015-04-20	1	63	64.4654	88	0.995475	85	-3	0.965909	0	0	0	77.5527	57.2649	1	0	1	0	0	0	0		2	1	0	0	1	1	1.42
485	4	2016-07-15	0	65	62	86	0.972851	83	-3	0.965116	0	0	0	83.5598	70.6028	0	0	0	0	0	0	0			0	0	0	1	1	0.87
486	5	2015-06-08	1	50	73	84	0.950226	81	-3	0.964286	0	0	0	61.8882	63.9585	1	0	0	0	0	0	0			1	0	0	2	1	1.01
487	5	2013-07-15	0	67	65	82	0.927602	79	-3	0.963415	0	0	0	87.5906	75.318	1	0	0	0	0	0	0	2		0	0	0	1	1	1.23
488	6	2016-04-21	0	67	47	82	0.927602	79	-3	0.963415	0	0	0	83.8828	43.9974	0	0	0	0	0	1	0			0	0	0	1	1	1.03
489	5	2016-04-20	0	58	64	79	0.893665	76	-3	0.962025	0	0	0	90.7524	74.6155	1	0	0	0	0	1	0			0	0	0	1	1	1.1732
490	6	2016-10-09	0	62	51	77	0.871041	74	-3	0.961039	0	0	0	90.8786	53.1278	1	0	1	0	0	1	0			1	0	0	1	1	1.1732
491	6	2016-09-07	1	68	56	75	0.848416	72	-3	0.96	0	0	0	94.001	61.0323	1	0	1	0	0	1	0			0	0	0	1	1	0.72
492	5	2017-02-27	1	74	56	75	0.848416	72	-3	0.96	0	0	0	96.2095	68.3085	1	0	0	0	0	0	0			0	0	0	1	1	1.29
493	5	2014-05-26	0	66	63	74	0.837104	71	-3	0.959459	0	0	0	97.5824	77.4388	1	0	0	0	0	0	0			0	0	0	1	1	1.1732
494	4	2012-06-20	1	59	70.1	74	0.837104	71	-3	0.959459	0	0	0	75.572	85.6272	1	0	0	0	0	1	0			1	0	1	2	1	1.09
495	6	2015-10-19	0	65	60	73	0.825792	70	-3	0.958904	0	0	0	96.5371	65.4968	0	0	0	0	0	0	1	3		1	0	1	1	1	0.96
496	5	2016-05-16	0	67	54	72	0.81448	69	-3	0.958333	0	0	0	102.068	72.0748	1	0	0	0	0	1	0			1	0	1	1	1	1.16
497	4	2016-11-09	0	59	72	72	0.81448	69	-3	0.958333	0	0	0	78.2036	91.103	1	0	1	0	0	0	0			0	0	0	2	1	1.6
498	5	2016-06-01	1	77	58	70	0.791855	67	-3	0.957143	0	0	0	103.558	73.7976	1	0	1	0	0	1	0			1	0	0	1	1	0.87
499	6	2016-11-16	0	74	60	67	0.757919	64	-3	0.955224	0	0	0	107.889	76.179	1	0	0	0	0	1	0		1	1	0	0	1	1	1.09
500	4	2016-12-30	1	77	65	65	0.735294	62	-3	0.953846	0	0	0	115.626	98.5586	1	0	0	0	0	1	0			0	0	0	1	1	0.98
501	5	2016-07-15	0	62	55	65	0.735294	62	-3	0.953846	0	0	0	114.17	79.3996	0	0	0	0	0	1	1	4		0	0	0	1	1	1.58
502	4	2016-02-26	0	38	62	65	0.735294	62	-3	0.953846	0	0	0	118.987	103.218	0	1	0	0	0	1	0			0	0	0	1	1	1.49
503	3	2014-12-16	0	72	70	63	0.71267	60	-3	0.952381	0	0	0	93.4996	108.186	1	0	0	0	0	1	0		1	1	0	0	2	1	1.22
504	6	2015-11-02	1	71	67	62	0.701357	59	-3	0.951613	0	0	0	86.7504	74.4547	1	0	0	0	0	1	0			0	0	0	2	1	1.1732
505	5	2017-03-13	0	65	64.4654	62	0.701357	59	-3	0.951613	0	0	0	88.1858	77.8723	1	0	0	0	0	1	1	3		0	0	0	2	1	1.1732
506	5	2016-03-14	0	67	60	60	0.678733	57	-3	0.95	0	0	0	125.164	93.6677	0	0	0	0	0	0	0			0	0	0	1	1	1.26
507	5	2015-02-09	0	67	53	59	0.667421	56	-3	0.949153	0	0	0	126.109	79.9087	1	0	0	0	0	1	0			0	0	1	1	1	1.1732
508	6	2013-07-17	0	52	49	54	0.61086	51	-3	0.944444	0	0	0	137.034	73.2922	1	0	1	0	0	1	0		1	1	0	0	1	1	1.1732
509	5	2014-04-03	1	7	64	54	0.61086	51	-3	0.944444	0	0	0	142.367	114.243	1	0	0	0	0	1	0			0	0	0	1	1	2.47
510	4	2014-07-07	0	66	49	51	0.576923	48	-3	0.941176	0	0	0	153.966	96.8977	1	0	0	0	0	1	0			1	0	0	1	1	1
511	5	2016-09-19	1	59	53	50	0.565611	47	-3	0.94	0	0	0	154.131	98.3749	0	0	0	0	0	1	0			1	0	1	1	1	1.24
512	7	2013-05-06	1	47	59	120	1.35747	116	-4	0.966667	0	0	0	53.3785	34.7459	1	0	0	0	0	1	0			1	0	0	1	1	0.81
513	6	2016-07-08	0	55	57	107	1.21041	103	-4	0.962617	0	0	0	61.8878	41.6334	1	0	1	0	0	1	0			0	0	0	1	1	1.31
514	5	2016-10-09	0	57	62	99	1.11991	95	-4	0.959596	0	0	0	69.8158	57.2239	1	0	0	0	0	1	0			0	0	0	1	1	1.04
515	5	2015-01-21	1	76	73	99	1.11991	95	-4	0.959596	0	0	0	52.0919	58.632	1	0	0	0	0	1	0			1	0	0	2	1	1.01
516	5	2016-04-06	0	43	62	99	1.11991	95	-4	0.959596	0	0	0	70.3741	59.164	0	0	0	0	0	1	0			0	0	1	1	1	1.21
517	4	2014-12-10	1	61	64.4654	96	1.08597	92	-4	0.958333	0	0	0	54.7266	56.3405	1	0	0	0	0	1	0		3	0	0	0	2	1	1.33
518	3	2015-12-09	1	63	79	92	1.04072	88	-4	0.956522	0	0	0	60.0307	82.325	1	0	0	0	0	0	0			1	0	0	2	1	1.1
519	5	2016-06-20	0	58	50	84	0.950226	80	-4	0.952381	0	0	0	83.328	51.2996	1	0	0	0	0	0	0			0	0	0	1	1	1.1732
520	5	2012-01-12	0	34	75	78	0.882353	74	-4	0.948718	0	0	0	68.5671	76.3546	0	0	0	0	0	1	0			1	0	0	2	1	1.25
521	6	2015-08-10	0	67	64.4654	75	0.848416	71	-4	0.946667	0	0	0	93.1614	66.7571	1	0	0	0	0	0	0		2	0	0	0	1	1	1.35
522	6	2016-05-09	0	26	54	75	0.848416	71	-4	0.946667	0	0	0	94.635	60.9669	0	0	0	0	0	1	0			0	0	0	1	1	0.75
523	3	2015-02-25	0	58	64.4654	73	0.825792	69	-4	0.945205	0	0	0	106.834	102.373	1	0	0	0	0	1	0		1	1	0	0	1	1	1.19
524	6	2016-08-24	0	6	64.4654	71	0.803167	67	-4	0.943662	0	0	0	100.633	76.1805	0	0	0	0	0	1	0			0	0	0	1	1	0.91
525	4	2017-02-15	0	50	76	70	0.791855	66	-4	0.942857	0	0	0	80.3415	97.2603	1	1	0	0	0	1	0			1	0	0	2	1	1.91
526	6	2014-11-27	0	65	64.4654	70	0.791855	66	-4	0.942857	0	0	0	102.263	77.148	0	0	0	0	0	0	0			0	0	0	1	1	1.18
527	3	2013-06-19	1	63	68	69	0.780543	65	-4	0.942029	0	0	0	83.1383	92.9132	1	0	0	0	0	1	0			1	0	0	2	1	1.44
528	5	2015-04-29	1	73	61	68	0.769231	64	-4	0.941176	0	0	0	107.013	79.6651	1	0	1	0	0	1	0			0	0	0	1	1	1.1732
529	6	2011-11-07	0	58	64.4654	65	0.735294	61	-4	0.938462	0	0	0	110.433	79.2727	1	0	0	0	0	1	1	4	2	0	0	0	1	1	1.09
530	5	2016-05-23	1	67	56	64	0.723982	60	-4	0.9375	0	0	0	116.435	82.6921	1	0	1	0	0	0	0			0	0	0	1	1	1.1732
531	6	2012-09-27	0	73	48.6	63	0.71267	59	-4	0.936508	0	0	0	115.53	64.756	0	0	0	0	0	0	0			0	0	0	1	1	1.2
532	5	2016-09-21	1	56	55	63	0.71267	59	-4	0.936508	0	0	0	116.419	76.1292	0	0		0	0	1	0			0	0	0	1	1	0.81
533	5	2015-03-13	0	60	54	59	0.667421	55	-4	0.932203	0	0	0	128.526	88.1958	1	0	0	0	0	1	0			1	0	0	1	1	1.12
534	6	2012-12-26	0	22	42	57	0.644796	53	-4	0.929825	0	0	0	128.883	59.8674	1	0	0	0	0	0	1	3		0	0	0	1	1	0.54
535	6	2013-05-27	0	61	64.4654	57	0.644796	53	-4	0.929825	0	0	0	128.751	91.3725	0	0		0	0	0	0	2		0	0	0	1	1	1.66
536	5	2016-11-28	1	68	65	51	0.576923	47	-4	0.921569	0	0	0	150.677	118.377	1	0	0	0	0	0	0			1	0	0	1	1	0.87
537	5	2014-02-20	0	57	61	137	1.54977	132	-5	0.963504	0	0	0	48.4853	42.4564	1	0	0	0	0	1	0			0	0	0	1	1	1.1732
538	5	2014-02-26	1	56	68	136	1.53846	131	-5	0.963235	0	0	0	35.7127	37.8917	1	0	0	0	0	1	0	1		1	0	0	2	1	1.14
539	5	2016-04-18	0	58	75	129	1.45928	124	-5	0.96124	0	0	0	37.7486	42.9297	1	0	0	0	1	1	0		1	1	0	0	2	1	1.69
540	6	2012-05-21	1	51	64	126	1.42534	121	-5	0.960317	0	0	0	51.396	40.3636	1	0	1	0	0	1	0			0	0	0	1	1	0.93
541	4	2015-08-27	0	57	64.4654	104	1.17647	99	-5	0.951923	0	0	0	67.4595	61.8807	0	0	0	0	0	0	0		2	0	0	0	1	1	1.26
542	6	2016-11-21	0	73	66	101	1.14253	96	-5	0.950495	0	0	0	65.6414	48.6991	1	0	0	0	0	0	1	4		0	0	0	1	1	0.81
543	5	2013-05-27	1	55	55	101	1.14253	96	-5	0.950495	0	0	0	68.7061	51.2563	1	0	1	0	0	1	0	2		1	0	1	1	1	0.83
544	6	2013-05-27	1	7	76	100	1.13122	95	-5	0.95	0	0	0	50.2891	54.1859	0	0	0	0	0	0	0			1	0	0	2	1	1.1732
545	4	2016-07-06	1	57	64.4654	100	1.13122	95	-5	0.95	0	0	0	71.6126	67.5544	0	0	0	0	0	0	0			0	0	0	1	1	1.16
546	6	2016-05-23	0	37	50	99	1.11991	94	-5	0.949495	0	0	0	68.7006	42.7913	0	0	1	0	0	1	0		1	1	0	0	1	1	1.41
547	5	2013-07-17	0	72	75	96	1.08597	91	-5	0.947917	0	0	0	53.9533	62.018	1	0	1	0	0	1	0			1	0	0	2	1	1.09
548	7	2016-09-08	0	63	51	94	1.06335	89	-5	0.946809	0	0	0	70.2253	36.2742	1	0	0	0	0	1	0			1	0	0	1	1	0.94
549	5	2016-04-06	0	61	73	87	0.984163	82	-5	0.942529	0	0	0	60.0052	64.5623	1	0	0	0	0	1	0			0	0	0	2	1	1.7
550	5	2014-04-14	0	61	64	86	0.972851	81	-5	0.94186	0	0	0	83.2908	71.9992	1	0	0	0	0	1	0	2		1	0	0	1	1	1.42
551	5	2016-05-06	0	72	61	85	0.961538	80	-5	0.941176	0	0	0	84.0561	68.2632	1	0	0	0	0	1	0			0	0	0	1	1	1.07
552	3	2015-11-03	1	4	80	84	0.950226	79	-5	0.940476	0	0	0	68.049	95.8788	1	0	0	0	0	1	0			1	0	0	2	1	1.05
553	5	2016-05-30	0	56	76	83	0.938914	78	-5	0.939759	0	0	0	63.4748	71.044	1	0	1	0	0	0	0			0	0	0	2	1	0.74
554	4	2016-09-28	1	66	49	75	0.848416	70	-5	0.933333	0	0	0	101.315	71.5824	1	0	1	0	0	0	0		1	0	0	0	1	1	1.1732
555	5	2015-04-03	1	65	64	74	0.837104	69	-5	0.932432	0	0	0	97.7704	79.3284	1	0	0	0	0	0	0			1	0	1	1	1	1.13
556	2	2016-04-25	0	63	85	74	0.837104	69	-5	0.932432	0	0	0	82.1891	125.5	1	0	1	0	0	1	0			0	0	0	2	1	1.1732
557	5	2014-12-10	1	66	55	74	0.837104	69	-5	0.932432	0	0	0	96.8971	65.4802	0	0	0	0	0	0	0			0	0	0	1	1	1.15
558	4	2016-03-02	0	70	85	73	0.825792	68	-5	0.931507	0	0	0	75.1922	98.2718	0	0	0	0	0	0	0			1	0	1	2	1	1.34
559	5	2017-02-13	0	55	64	72	0.81448	67	-5	0.930556	0	0	0	100.44	79.8695	1	1	1	0	0	1	0			0	0	0	1	1	1.13
560	4	2016-09-14	0	38	61	70	0.791855	65	-5	0.928571	0	0	0	109.458	94.8565	1	0	0	0	0	1	0			0	0	0	1	1	0.83
561	6	2010-04-30	1	61	64.4654	66	0.746606	61	-5	0.924242	0	0	0	108.944	79.8425	1	0	0	0	0	1	0		1	0	0	0	1	1	1.1732
562	6	2016-04-15	0	62	56	66	0.746606	61	-5	0.924242	0	0	0	109.555	71.4384	1	0	0	0	0	1	0	2		0	0	0	1	1	1.09
563	5	2016-03-16	0	68	60	65	0.735294	60	-5	0.923077	0	0	0	114.289	86.9872	1	0	0	0	0	0	0			0	0	0	1	1	1.12
564	3	2012-11-22	1	26	68	65	0.735294	60	-5	0.923077	0	0	0	90.7254	103.333	0	0	1	0	0	0	0		2	1	0	0	2	1	1.64
565	6	2016-08-24	1	57	64.4654	60	0.678733	55	-5	0.916667	0	0	0	120.494	83.3271	1	0	0	0	0	0	0			0	0	0	1	1	0.92
566	5	2016-01-04	0	55	60	59	0.667421	54	-5	0.915254	0	0	0	126.976	93.2644	0	0		0	0	1	0			0	0	0	1	1	1.07
567	4	2016-06-01	0	61	64	58	0.656109	53	-5	0.913793	0	0	0	133.902	114.611	1	0	1	0	0	1	0			0	0	0	1	1	1.5
568	4	2011-08-02	0	61	64.4654	56	0.633484	51	-5	0.910714	0	0	0	139.839	120.675	1	0	0	0	0	0	0			1	0	0		1	1.1732
569	4	2015-01-14	1	68	69	56	0.633484	51	-5	0.910714	0	0	0	102.71	106.178	0	0	0	0	0	1	0		1	0	0	0	2	1	1.02
570	5	2014-11-04	1	52	59	53	0.599548	48	-5	0.90566	0	0	0	143.893	102.665	1	0	0	0	0	0	0			0	0	0	1	1	1.42
571	4	2014-11-07	0	69	45	53	0.599548	48	-5	0.90566	0	0	0	150.446	91.6273	1	0	0	0	0	0	0			0	0	1	1	1	1.57
572	6	2016-08-15	0	51	41	134	1.51584	128	-6	0.955224	0	0	0	48.2221	25.3125	1	1	0	0	0	0	0		1	0	0	0	1	1	1.1732
573	7	2016-05-04	0	73	55	129	1.45928	123	-6	0.953488	0	0	0	49.0711	29.9856	0	0	1	0	0	0	0			0	0	0	1	1	0.91
574	7	2017-02-10	0	69	49	115	1.3009	109	-6	0.947826	0	0	0	56.3275	31.0903	0	0	0	0	0	1	0			0	0	0	1	1	1.1732
575	5	2013-04-17	0	49	64.4654	100	1.13122	94	-6	0.94	0	0	0	68.716	57.7984	1	0	1	0	0	0	0			0	0	0	1	1	1.08
576	5	2015-04-13	1	32	62	99	1.11991	93	-6	0.939394	0	0	0	70.4776	59.5137	1	0	0	0	0	0	0			1	0	0	1	1	1.1
577	4	2015-01-12	0	64	80	99	1.11991	93	-6	0.939394	0	0	0	53.0157	68.718	1	0	0	0	0	0	0			0	0	0	2	1	1.78
578	5	2016-08-12	0	50	68	89	1.00679	83	-6	0.932584	0	0	0	58.9199	60.8248	0	0	1	0	0	1	0			0	0	1	2	1	1.28
579	4	2017-02-23	0	59	65	88	0.995475	82	-6	0.931818	0	0	0	83.3274	78.367	1	0	0	0	0	1	0			0	0	1	1	1	1.05
580	3	2016-06-29	0	68	68	87	0.984163	81	-6	0.931034	0	0	0	64.4788	76.2642	0	1	1	0	0	0	0			0	0	0	2	1	0.9
581	6	2016-03-21	0	54	60	83	0.938914	77	-6	0.927711	0	0	0	83.6956	59.3589	0	0	1	0	0	1	0			1	0	0	1	1	1.58
582	5	2014-07-11	1	57	64.4654	81	0.91629	75	-6	0.925926	0	0	0	86.7844	68.1436	1	0	1	0	0	1	0			0	0	1	1	1	1.1732
583	5	2014-07-07	0	61	62	81	0.91629	75	-6	0.925926	0	0	0	88.0887	70.2158	1	0	0	0	0	1	0			1	0	0	1	1	0.97
584	4	2014-10-08	0	67	56	79	0.893665	73	-6	0.924051	0	0	0	92.2625	69.7046	1	0	0	0	0	1	0			0	0	0	1	1	1.1732
585	4	2016-04-11	1	63	80	78	0.882353	72	-6	0.923077	0	0	0	69.3801	85.3041	1	0	0	0	0	0	0			0	0	0	2	1	1.1732
586	4	2013-01-17	0	6	75	78	0.882353	72	-6	0.923077	0	0	0	69.8675	82.0235	0	0	0	0	0	1	0			0	0	1	2	1	1.21
587	5	2016-10-21	0	70	60	75	0.848416	69	-6	0.92	0	0	0	95.5388	70.9326	1	0		0	0	0	0	2	1	1	0	0	1	1	0.87
588	5	2016-06-13	1	39	64.4654	73	0.825792	67	-6	0.917808	0	0	0	97.8224	75.5074	1	0	0	0	0	0	0		1	0	0	0	1	1	1.27
589	4	2015-03-23	1	59	70	73	0.825792	67	-6	0.917808	0	0	0	74.8717	79.6713	0	0	0	0	0	1	1			0	0	0	2	1	0.92
590	4	2017-02-06	0	68	48	72	0.81448	66	-6	0.916667	0	0	0	104.499	69.5987	1	0	1	0	0	1	0			0	0	0	1	1	1.15
591	4	2013-08-07	0	68	70	72	0.81448	66	-6	0.916667	0	0	0	76.7166	83.2685	0	0	0	0	0	1	0			1	0	1	2	1	1.43
592	4	2016-08-15	0	69	53	68	0.769231	62	-6	0.911765	0	0	0	109.779	76.8675	1	0	1	0	0	1	0	2		1	0	0	1	1	0.79
593	5	2015-03-16	0	62	63	65	0.735294	59	-6	0.907692	0	0	0	113.569	88.9566	0	0	1	0	0	1	0			0	0	0	1	1	1.03
594	6	2016-11-21	1	64	60	64	0.723982	58	-6	0.90625	0	0	0	113.317	78.2204	1	0	1	0	0	0	0			1	0	0	1	1	1.04
595	5	2016-11-23	0	77	61	64	0.723982	58	-6	0.90625	0	0	0	115.198	86.0901	0	0	0	0	0	0	0			1	0	0	1	1	0.89
596	5	2016-07-20	0	67	67	64	0.723982	58	-6	0.90625	0	0	0	85.6639	81.1526	0	1	1	0	0	0	0		1	1	0	1	2	1	1.1732
597	6	2013-04-08	0	58	59	60	0.678733	54	-6	0.9	0	0	0	121.422	79.7026	0	0	1	0	0	0	0			0	0	0	1	1	0.43
598	5	2012-06-06	1	66	64.4654	58	0.656109	52	-6	0.896552	0	0	0	131.492	108.371	0	0	1	0	0	1	1	4		0	0	0	1	1	0.77
599	6	2015-10-26	0	41	60	54	0.61086	48	-6	0.888889	0	0	0	137.981	93.1242	1	0	0	0	0	0	0	1		0	0	0	1	1	1.1732
600	4	2016-03-25	0	31	56	101	1.14253	94	-7	0.930693	0	0	0	69.6901	55.1052	1	0	0	0	0	1	0			1	1	0	1	1	1.22
601	5	2015-10-19	0	28	74	144	1.62896	137	-7	0.951389	0	0	0	33.1723	37.5234	1	0	0	0	0	1	0	2		1	0	1	2	1	1.7
602	6	2011-06-13	1	73	56.1	106	1.1991	99	-7	0.933962	0	0	0	62.3858	40.6683	1	0	0	0	0	0	1	3		0	0	0	1	1	1
603	5	2014-08-04	0	52	65	104	1.17647	97	-7	0.932692	0	0	0	65.5505	55.5527	1	0	0	0	0	0	0			0	0	0	1	1	1.02
604	4	2016-03-16	0	66	69	94	1.06335	87	-7	0.925532	0	0	0	57.6363	67.373	0	0	1	0	0	0	0			1	0	1	2	1	0.97
605	5	2013-05-10	0	62	73	93	1.05204	86	-7	0.924731	0	0	0	55.0411	57.8273	0	0	0	0	0	1	0			0	0	0	2	1	1.1732
606	5	2016-04-15	0	43	70	92	1.04072	85	-7	0.923913	0	0	0	55.7813	56.2928	1	0	0	0	0	1	0			0	0	0	2	1	1.1732
607	4	2017-02-27	1	45	70	92	1.04072	85	-7	0.923913	0	0	0	58.5459	67.9273	0	0	1	0	0	1	0			0	0	0	2	1	1.66
608	5	2016-10-24	1	62	74	91	1.02941	84	-7	0.923077	0	0	0	56.2869	59.1172	0	0	0	0	0	0	0			0	0	0	2	1	1.36
609	4	2016-03-23	1	27	55	88	0.995475	81	-7	0.920455	0	0	0	81.808	62.4085	1	0	1	0	0	0	0		2	1	0	0	1	1	1.66
610	6	2012-07-11	1	7	66.5	81	0.91629	74	-7	0.91358	0	0	0	85.7024	65.779	1	0		0	0	1	0	2		0	0	0	1	1	1.18
611	5	2016-01-20	0	68	64	78	0.882353	71	-7	0.910256	0	0	0	91.4307	73.1902	1	0	0	0	0	1	0			1	0	0	1	1	1.23
612	4	2016-04-21	1	42	71	77	0.871041	70	-7	0.909091	0	0	0	72.0872	83.0048	0	0	0	0	0	1	0			1	0	0	2	1	1.17
613	6	2015-01-05	1	6	65	74	0.837104	67	-7	0.905405	0	0	0	94.1468	66.1698	0	0	0	0	0	1	0			0	0	0	1	1	1.1732
614	4	2012-10-17	1	61	81	73	0.825792	66	-7	0.90411	0	0	0	75.6935	95.8521	0	0	0	0	0	1	0			0	0	0	2	1	1.43
615	5	2015-03-11	0	63	67	70	0.791855	63	-7	0.9	0	0	0	78.2177	78.1101	1	0	1	0	0	1	0			0	0	0	2	1	1.1732
616	4	2015-07-08	0	45	64	70	0.791855	63	-7	0.9	0	0	0	109.826	100.466	0	0	0	0	0	0	0			0	0	0	1	1	1.04
617	5	2016-12-09	0	66	61	65	0.735294	58	-7	0.892308	0	0	0	112.358	82.054	1	0	0	0	0	0	0			1	0	0	1	1	1.1732
618	5	2014-11-21	0	30	55	61	0.690045	54	-7	0.885246	0	0	0	121.244	79.8839	1	0	1	0	0	0	0		1	0	0	0	1	1	1.1732
619	5	2016-11-11	0	65	56	58	0.656109	51	-7	0.87931	0	0	0	129.183	87.5894	0	0	0	0	0	1	0			0	0	0	1	1	1.1732
620	5	2015-05-04	1	68	64.4654	57	0.644796	50	-7	0.877193	0	0	0	131.531	101.663	0	0	0	0	0	1	1	3		0	0	0	1	1	1.1732
621	4	2014-11-19	1	67	68	43	0.486425	36	-7	0.837209	0	0	0	139.758	137.744	0	0	1	0	0	1	0	2		0	0	0	2	1	2.02
622	5	2013-04-10	1	76	65	119	1.34615	111	-8	0.932773	0	0	0	56.7985	51.1887	1	0	0	0	0	0	1	3		1	0	0	1	1	0.98
623	6	2016-09-07	0	68	56	103	1.16516	95	-8	0.92233	0	0	0	64.1638	40.4816	0	0		0	0	1	1	4		0	0	0	1	1	0.85
624	5	2016-09-07	0	63	65	98	1.1086	90	-8	0.918367	0	0	0	70.0981	58.5456	1	0	0	0	0	0	0			0	0	0	1	1	1.12
625	6	2011-02-25	1	6	70	98	1.1086	90	-8	0.918367	0	0	0	51.5524	51.3187	0	0	1	0	0	1	0			0	0	0	2	1	1.16
626	6	2015-12-18	0	63	64	97	1.09729	89	-8	0.917526	0	0	0	70.2445	55.5249	1	0	1	0	1	0	1	3		0	0	0	1	1	1.1732
627	5	2016-07-06	1	55	52	92	1.04072	84	-8	0.913043	0	0	0	76.445	52.9901	1	0	0	0	0	1	0		1	1	0	0	1	1	1.28
628	5	2017-01-04	0	66	62	90	1.0181	82	-8	0.911111	0	0	0	79.1101	66.8949	1	0	1	0	0	1	0			1	0	0	1	1	1.12
629	5	2014-12-09	0	75	75	85	0.961538	77	-8	0.905882	0	0	0	61.7869	68.616	1	0	0	0	0	0	0			1	0	0	2	1	1.39
630	4	2016-05-06	0	62	55	84	0.950226	76	-8	0.904762	0	0	0	86.5283	65.9376	1	0	0	0	0	1	0			1	0	0	1	1	0.99
631	6	2015-03-30	1	67	52	82	0.927602	74	-8	0.902439	0	0	0	84.3088	50.1647	0	0	0	0	0	1	0			0	0	0	1	1	1.1732
632	7	2016-08-12	0	77	48	81	0.91629	73	-8	0.901235	0	0	0	84.3654	43.1002	0	0	0	0	0	1	0			1	0	0	1	1	1.1732
633	5	2015-12-21	0	65	87	80	0.904977	72	-8	0.9	0	0	0	66.7011	86.9354	1	0	0	0	0	1	0			0	0	0	2	1	1.64
634	7	2016-06-22	0	57	54	80	0.904977	72	-8	0.9	0	0	0	84.9647	46.6575	0	0	0	0	0	1	0			0	0	0	1	1	0.91
635	5	2014-11-26	1	66	64	77	0.871041	69	-8	0.896104	0	0	0	93.1942	75.5527	0	0	0	0	0	0	0			1	0	1	1	1	1.47
636	5	2016-07-13	0	63	51	76	0.859729	68	-8	0.894737	0	0	0	94.8761	61.7431	0	0	0	0	0	1	0	2		1	0	0	1	1	1.1732
637	3	2015-05-25	0	43	64	75	0.848416	67	-8	0.893333	0	0	0	101.47	93.8943	0	0	1	0	0	0	0			1	0	0	1	1	0.79
638	3	2015-09-25	0	26	64.4654	73	0.825792	65	-8	0.890411	0	0	0	107.094	102.961	0	0	1	0	0	0	1	4	1	1	0	0	1	1	1.77
639	3	2013-07-24	1	69	89	70	0.791855	62	-8	0.885714	0	0	0	82.393	122.291	1	0	0	0	0	1	0			0	0	0	2	1	1.1732
640	5	2015-03-25	0	66	55	69	0.780543	61	-8	0.884058	0	0	0	105.993	73.1182	1	0	0	0	0	0	0			0	0	0	1	1	0.89
641	6	2015-12-09	1	69	45	65	0.735294	57	-8	0.876923	0	0	0	109.616	52.9632	0	0	0	0	0	1	0			0	0	0	1	1	2.05
642	6	2014-12-03	1	72	53	64	0.723982	56	-8	0.875	0	0	0	111.972	64.6572	0	0	0	0	0	0	0			0	0	0	1	1	1.94
643	4	2014-08-15	1	58	68	63	0.71267	55	-8	0.873016	0	0	0	91.4878	99.145	1	0	1	0	0	0	0			1	0	0	2	1	1.14
644	5	2012-09-12	0	68	62.4	62	0.701357	54	-8	0.870968	0	0	0	120.321	93.6423	0	0	0	0	0	1	0		1	1	0	1	1	1	0.83
645	5	2016-05-11	0	66	60	60	0.678733	52	-8	0.866667	0	0	0	125.677	95.2285	1	0	0	0	0	1	0			1	0	0	1	1	0.82
646	5	2015-05-06	1	70	60	59	0.667421	51	-8	0.864407	0	0	0	125.738	89.2313	1	0	0	0	0	0	0			0	0	0	1	1	0.95
647	4	2015-05-15	1	44	60	59	0.667421	51	-8	0.864407	0	0	0	130.061	102.357	1	0	0	0	0	1	0			1	0	0	1	1	0.95
648	5	2016-12-28	0	63	57	58	0.656109	50	-8	0.862069	0	0	0	130.561	93.2163	1	0	0	0	0	0	0		1	1	0	0	1	1	1.58
649	4	2014-08-20	0	63	56	53	0.599548	45	-8	0.849057	0	0	0	146.596	104.82	1	0	1	0	0	1	0			0	0	0	1	1	1.1732
650	5	2015-05-06	1	69	62	46	0.520362	38	-8	0.826087	0	0	0	167.552	118.191	0	0	0	0	0	1	0			0	0	0	1	1	1.1732
651	4	2014-09-15	0	66	57	131	1.4819	122	-9	0.931298	0	0	0	51.6099	43.2107	1	0	0	0	0	0	0		1	1	0	0	1	1	1.02
652	5	2015-01-19	1	61	82	129	1.45928	120	-9	0.930233	0	0	0	38.3987	50.6423	1	0	0	0	0	0	0			1	0	0	2	1	1.03
653	5	2016-09-26	1	27	62	108	1.22172	99	-9	0.916667	0	0	0	62.6184	50.5048	1	0	0	0	0	1	0		1	0	0	0	1	1	0.94
654	4	2016-10-26	1	64	59	105	1.18778	96	-9	0.914286	0	0	0	68.2973	60.5009	0	0	0	0	0	0	0			0	0	0	1	1	1.1732
655	3	2016-03-30	0	55	70	105	1.18778	96	-9	0.914286	0	0	0	51.7721	64.6524	0	0	1	0	0	1	0	2		1	0	1	2	1	1.26
656	4	2016-09-05	0	25	165	100	1.13122	91	-9	0.91	0	0	0	53.8415	152.886	1	0	0	0	0	0	0			0	0	0	2	1	1.06
657	4	2015-07-02	0	66	67	97	1.09729	88	-9	0.907216	0	0	0	55.3565	62.6306	1	0	1	0	0	1	0		1	1	0	0	2	1	0.94
658	6	2014-08-11	0	6	78	94	1.06335	85	-9	0.904255	0	0	0	54.039	59.3181	1	0	0	0	0	0	0			1	0	0	2	1	1.48
659	3	2014-02-19	1	66	84	92	1.04072	83	-9	0.902174	0	0	0	60.3306	88.6475	0	0	1	0	0	1	0	1		0	0	0	2	1	1.13
660	6	2014-02-12	0	6	48	91	1.02941	82	-9	0.901099	0	0	0	75.3723	43.6477	1	0	1	0	0	1	0			1	0	0	1	1	1.41
661	6	2015-11-20	0	66	64.4654	90	1.0181	81	-9	0.9	0	0	0	75.3555	55.0575	1	0	1	0	0	0	0			1	0	1	1	1	1.15
662	6	2015-05-20	1	7	64	89	1.00679	80	-9	0.898876	0	0	0	77.28	59.2992	1	0		0	0	1	0			0	0	0	1	1	1.2
663	5	2015-06-17	0	50	66	87	0.984163	78	-9	0.896552	0	0	0	82.1058	73.1176	1	0	1	0	0	1	0			1	0	0	1	1	0.96
664	6	2015-05-29	1	66	45	85	0.961538	76	-9	0.894118	0	0	0	81.781	44.476	1	0	1	0	0	0	0			0	0	0	1	1	1.29
665	5	2013-05-13	1	34	77	85	0.961538	76	-9	0.894118	0	0	0	61.4249	68.6275	0	0	0	0	0	1	0			0	0	0	2	1	1.61
666	5	2016-01-04	0	77	64.4654	84	0.950226	75	-9	0.892857	0	0	0	83.3572	66.2546	1	1	0	0	0	0	0			1	0	0	1	1	1.44
667	3	2016-03-30	0	70	74	84	0.950226	75	-9	0.892857	0	0	0	66.6117	84.2497	1	0	0	0	0	1	0			0	0	0	2	1	1.23
668	3	2015-08-28	0	67	85	84	0.950226	75	-9	0.892857	0	0	0	66.527	96.4522	0	0	0	0	0	1	0			0	0	0	2	1	1.51
669	6	2017-02-22	1	64	60	81	0.91629	72	-9	0.888889	0	0	0	86.0699	60.7672	1	0	1	0	0	1	0			0	0	1	1	1	1.25
670	4	2016-06-29	1	65	77	80	0.904977	71	-9	0.8875	0	0	0	69.5307	88.7296	0	0	0	0	0	1	0			0	0	0	2	1	1.33
671	4	2015-11-04	1	71	76	79	0.893665	70	-9	0.886076	0	0	0	68.662	81.2811	1	0	0	0	0	1	0			1	0	0	2	1	1.19
672	3	2016-12-09	0	55	73	79	0.893665	70	-9	0.886076	0	0	0	73.7496	94.9713	1	0	0	0	0	0	0		1	1	0	1	2	1	1.24
673	3	2016-04-13	1	59	76	76	0.859729	67	-9	0.881579	0	0	0	74.849	95.9064	1	0	0	0	0	0	0	2		1	0	0	2	1	1.7
674	5	2015-10-14	0	73	58	73	0.825792	64	-9	0.876712	0	0	0	99.5261	73.5309	0	0	1	0	0	0	1	4		0	0	0	1	1	0.64
675	4	2016-07-08	1	65	58	71	0.803167	62	-9	0.873239	0	0	0	106.982	87.2422	0	0	0	0	0	0	0			0	0	0	1	1	1
676	6	2016-10-12	0	60	64	69	0.780543	60	-9	0.869565	0	0	0	102.786	72.9337	1	1	0	0	0	0	0			0	0	0	1	1	1.6
677	5	2014-02-12	1	66	65	68	0.769231	59	-9	0.867647	0	0	0	106.549	83.1721	1	0	0	0	0	0	0			0	0	0	1	1	1.32
678	6	2014-12-29	0	69	50	68	0.769231	59	-9	0.867647	0	0	0	104.508	57.7382	0	0	0	0	0	0	0	2		1	0	0	1	1	1.55
679	5	2014-11-10	0	71	57	66	0.746606	57	-9	0.863636	0	0	0	112.097	80.8047	1	0	1	0	0	1	0	2		0	0	0	1	1	1.84
680	5	2015-03-18	0	50	69	64	0.723982	55	-9	0.859375	0	0	0	86.8869	88.5626	1	0	0	0	0	0	1	3		1	0	0	2	1	0.61
681	5	2015-02-27	0	66	50	63	0.71267	54	-9	0.857143	0	0	0	115.94	67.8281	1	0	1	0	0	0	0			1	0	0	1	1	1.25
682	5	2016-03-16	1	53	52	58	0.656109	49	-9	0.844828	0	0	0	127.797	77.3613	0	0	0	0	0	0	0			1	0	0	1	1	1.21
683	5	2016-01-18	1	63	74	56	0.633484	47	-9	0.839286	0	0	0	99.1718	98.9445	1	0		0	0	1	0			0	0	0	2	1	1.19
684	4	2014-12-26	0	66	62	56	0.633484	47	-9	0.839286	0	0	0	138.961	113.722	0	0	1	0	0	0	0		2	0	0	0	1	1	1.2
685	3	2015-11-04	1	49	65	55	0.622172	46	-9	0.836364	0	0	0	147.665	135.997	0	0	0	0	0	1	0			1	0	0	1	1	1.05
686	5	2016-08-15	0	63	63	127	1.43665	117	-10	0.92126	0	0	0	52.4881	45.7475	0	0	0	0	0	1	0			1	0	0	1	1	1.12
687	6	2016-04-07	1	49	60	119	1.34615	109	-10	0.915966	0	0	0	54.8466	39.8412	0	1	1	0	0	0	0		4	1	0	0	1	1	1.1732
688	6	2012-10-18	1	62	70	114	1.28959	104	-10	0.912281	0	0	0	43.0023	42.5571	1	0	0	0	0	1	0		2	0	0	0	2	1	1.1732
689	6	2016-11-16	0	65	62	112	1.26697	102	-10	0.910714	0	0	0	58.207	41.0144	1	0	0	0	0	0	0			0	0	0	1	1	1.22
690	4	2015-05-15	0	43	57	109	1.23303	99	-10	0.908257	0	0	0	63.5241	51.0895	0	0	0	0	0	1	0			0	0	0	1	1	1.18
691	4	2016-07-18	1	34	76	107	1.21041	97	-10	0.906542	0	0	0	48.2668	59.5016	0	0	0	0	0	1	0			0	0	0	2	1	1.66
692	5	2016-10-14	0	61	66	94	1.06335	84	-10	0.893617	0	0	0	73.3963	61.3619	1	0	0	0	0	1	0			0	0	0	1	1	0.91
693	5	2015-04-20	0	74	55	94	1.06335	84	-10	0.893617	0	0	0	74.5204	54.7012	1	0	1	0	0	0	0		1	1	0	0	1	1	0.76
694	3	2014-06-03	0	7	69	90	1.0181	80	-10	0.888889	0	0	0	62.5131	76.2727	1	0	0	0	0	0	0			0	0	0	2	1	1.26
695	4	2015-03-16	0	65	72	90	1.0181	80	-10	0.888889	0	0	0	60.7236	73.8522	0	0	1	0	0	1	0			0	0	0	2	1	1.64
696	3	2016-02-26	0	72	95	90	1.0181	80	-10	0.888889	0	0	0	62.4124	104.621	0	0	0	0	0	1	0			0	0	0	2	1	0.84
697	4	2015-11-23	1	64	84	89	1.00679	79	-10	0.88764	0	0	0	61.2825	86.1872	0	0	0	0	0	1	0	2		1	0	1	2	1	1.09
698	6	2015-04-27	0	66	62	88	0.995475	78	-10	0.886364	0	0	0	77.0859	53.0817	0	0	0	0	0	1	0			0	0	0	1	1	1.1732
699	5	2013-03-25	0	66	64.4654	84	0.950226	74	-10	0.880952	0	0	0	85.5563	74.1591	1	0	1	0	0	1	0		1	1	0	1	1	1	1.42
700	4	2016-11-09	0	65	66	84	0.950226	74	-10	0.880952	0	0	0	86.4703	78.9401	0	0	0	0	0	1	1	3		0	0	0	1	1	0.77
701	3	2016-10-21	1	69	72	81	0.91629	71	-10	0.876543	0	0	0	69.7736	85.972	1	0	0	0	0	1	0			0	0	0	2	1	1.1732
702	4	2016-12-28	1	75	56	80	0.904977	70	-10	0.875	0	0	0	91.3012	69.8481	1	0	0	0	0	1	0			0	0	0	1	1	1.12
703	5	2011-06-22	0	38	54	79	0.893665	69	-10	0.873418	0	0	0	92.0752	66.7093	1	0	0	0	0	1	0			1	0	0	1	1	0.79
704	5	2013-01-09	0	63	52.3	71	0.803167	61	-10	0.859155	0	0	0	103.578	70.3875	0	0	0	0	0	1	0	2		0	0	0	1	1	1.1732
705	5	2017-05-16	0	36	50	62	0.701357	52	-10	0.83871	0	0	0	119.078	71.6945	1	0	0	0	1	1	0			0	0	0	1	1	1.3
706	5	2013-01-17	1	55	96	62	0.701357	52	-10	0.83871	0	0	0	88.9549	120.583	1	0	0	0	1	1	1	3		0	0	0	2	1	1.11
707	5	2015-12-28	1	62	72	61	0.690045	51	-10	0.836066	0	0	0	89.7002	87.6774	1	0	0	0	0	1	0			0	0	0	2	1	1.1732
708	5	2014-11-28	1	47	70	60	0.678733	50	-10	0.833333	0	0	0	91.4773	86.8861	0	0	0	0	0	1	0			0	0	0	2	1	0.99
709	6	2015-05-18	1	62	69	55	0.622172	45	-10	0.818182	0	0	0	99.9382	87.9821	1	0	0	0	0	1	0			1	0	0	2	1	1.41
710	3	2017-02-13	0	72	60	50	0.565611	40	-10	0.8	0	0	0	164.181	136.746	1	0	0	0	0	1	0		1	1	0	1	1	1	0.85
711	5	2014-04-16	0	62	75	137	1.54977	126	-11	0.919708	0	0	0	35.3773	41.301	1	0	1	0	0	1	0			0	0	0	2	1	1.1732
712	5	2016-08-26	0	28	55	99	1.11991	88	-11	0.888889	0	0	0	70.7384	53.5644	1	0	0	0	0	1	0			1	0	0	1	1	1.1732
713	6	2016-05-16	0	77	64	97	1.09729	86	-11	0.886598	0	0	0	69.4205	52.0604	1	0	0	0	0	0	0	2		1	0	0	1	1	1
714	4	2015-10-14	1	75	79	96	1.08597	85	-11	0.885417	0	0	0	55.4601	72.2926	1	0	0	0	0	0	0	2		0	0	0	2	1	0.98
715	5	2017-03-03	1	72	58	91	1.02941	80	-11	0.879121	0	0	0	77.7844	60.9073	1	0	0	0	0	0	0			0	0	0	1	1	0.97
716	5	2016-10-10	1	50	71	90	1.0181	79	-11	0.877778	0	0	0	57.6421	60.4162	1	0	0	0	0	0	1	3		1	0	0	2	1	1.1732
717	4	2015-01-07	0	62	75	90	1.0181	79	-11	0.877778	0	0	0	59.0516	70.3199	0	0	0	0	0	0	0			0	0	0	2	1	1.1732
718	4	2014-06-03	0	44	53	86	0.972851	75	-11	0.872093	0	0	0	84.3867	62.512	0	0	0	0	0	0	0	2		0	0	0	1	1	1.1732
719	3	2013-05-29	0	62	68	85	0.961538	74	-11	0.870588	0	0	0	66.1051	77.6881	0	0	1	0	0	1	0			0	0	0	2	1	1.1732
720	5	2013-03-20	1	65	50	82	0.927602	71	-11	0.865854	0	0	0	86.7257	55.5884	1	0	1	0	0	0	0	2		1	0	0	1	1	1.54
721	6	2017-01-20	1	59	50	82	0.927602	71	-11	0.865854	0	0	0	84.4685	48.7604	0	0	0	0	0	0	0			0	0	0	1	1	1.52
722	4	2015-05-18	0	31	50	82	0.927602	71	-11	0.865854	0	0	0	89.954	63.6984	0	0	0	0	0	1	0			0	0	0	1	1	1.31
723	4	2016-03-30	0	78	70	79	0.893665	68	-11	0.860759	0	0	0	70.1817	80.4455	0	0	0	0	0	0	0			0	0	0	2	1	1.75
724	6	2011-12-20	1	7	64.4654	77	0.871041	66	-11	0.857143	0	0	0	90.5055	65.5836	1	0	0	0	0	1	0		3	1	0	1	1	1	1.16
725	7	2015-08-17	1	53	53	77	0.871041	66	-11	0.857143	0	0	0	88.8635	47.8416	0	0	0	0	0	1	0	2		1	0	0	1	1	1.11
726	6	2015-02-04	1	49	43	76	0.859729	65	-11	0.855263	0	0	0	91.662	43.6953	1	0	0	0	0	0	1	4		1	0	0	1	1	0.85
727	6	2015-06-17	1	68	49	74	0.837104	63	-11	0.851351	0	0	0	96.0253	55.8111	1	0	0	0	0	1	0			0	0	1	1	1	1.6
728	6	2016-06-01	1	68	54	72	0.81448	61	-11	0.847222	0	0	0	98.2144	60.2099	1	0	1	0	0	0	0		1	0	0	0	1	1	1.14
729	5	2014-06-11	0	65	65	71	0.803167	60	-11	0.84507	0	0	0	102.06	82.2076	0	0	0	0	0	1	0	2		1	0	1	1	1	1.21
730	5	2016-11-28	0	67	62	69	0.780543	58	-11	0.84058	0	0	0	106.203	83.1224	0	0	0	0	0	1	0			0	0	0	1	1	0.97
731	6	2016-03-28	0	62	50	65	0.735294	54	-11	0.830769	0	0	0	110.146	60.5712	1	0	0	0	1	1	0			0	0	0	1	1	1.01
732	5	2011-06-16	1	67	65	64	0.723982	53	-11	0.828125	0	0	0	115.969	94.4138	1	0		0	0	1	0		1	0	0	0	1	1	0.82
733	6	2016-11-30	0	61	47	53	0.599548	42	-11	0.792453	0	0	0	137.734	64.7961	0	0	0	0	0	1	0			1	0	1	1	1	1.01
734	5	2016-12-23	0	61	65	116	1.31222	104	-12	0.896552	0	0	0	58.0637	50.8784	0	0	0	0	0	1	0	2		0	0	0	1	1	1.1732
735	5	2015-12-28	0	61	70	114	1.28959	102	-12	0.894737	0	0	0	43.3959	44.627	1	0	0	0	0	0	0	2		1	0	1	2	1	0.88
736	6	2016-12-23	0	54	64	108	1.22172	96	-12	0.888889	0	0	0	61.8772	49.13	1	0	1	0	0	0	0			0	0	1	1	1	0.98
737	5	2015-12-07	1	64	75	100	1.13122	88	-12	0.88	0	0	0	51.538	59.859	1	0	0	0	1	0	0			1	0	0	2	1	2.02
738	2	2016-04-06	0	56	64.4654	95	1.07466	83	-12	0.873684	0	0	0	84.0182	88.8982	1	0	1	0	0	1	0			0	0	1	1	1	1.03
739	5	2017-02-06	0	45	67	93	1.05204	81	-12	0.870968	0	0	0	55.6404	55.7851	0	0	1	0	0	1	0		1	0	0	0	2	1	1.44
740	5	2016-11-18	1	40	50	90	1.0181	78	-12	0.866667	0	0	0	77.4808	49.4624	0	0	0	0	0	0	0		1	1	0	0	1	1	1
741	4	2015-07-24	1	72	84	89	1.00679	77	-12	0.865169	0	0	0	61.0337	85.1402	1	0	1	0	0	0	0			0	0	0	2	1	0.91
742	2	2013-04-17	0	65	56	88	0.995475	76	-12	0.863636	0	0	0	91.367	82.7871	1	0	0	0	0	1	1	4		0	0	0	1	1	0.67
743	5	2013-08-14	1	6	76	87	0.984163	75	-12	0.862069	0	0	0	59.9941	67.1606	0	0	0	0	0	1	0			0	0	0	2	1	1.56
744	5	2015-03-24	0	50	42	83	0.938914	71	-12	0.855422	0	0	0	84.8262	44.4568	1	0	0	0	0	0	0			0	0	0	1	1	1.18
745	4	2015-08-24	0	3	99	80	0.904977	68	-12	0.85	0	0	0	69.4904	113.89	1	0	0	0	0	0	0			0	0	0	2	1	1.1
746	4	2016-06-08	0	72	69	78	0.882353	66	-12	0.846154	0	0	0	69.717	74.8875	1	0	0	0	0	1	0			1	0	0	2	1	1.83
747	4	2016-08-26	0	57	64.4654	72	0.81448	60	-12	0.833333	0	0	0	102.911	88.7387	0	0	1	0	0	1	0			0	0	0	1	1	1.38
748	5	2014-04-28	1	42	72	66	0.746606	54	-12	0.818182	0	0	0	81.9455	81.2254	0	0	0	0	0	1	0			1	0	0	2	1	2
749	6	2014-12-01	0	6	49	64	0.723982	52	-12	0.8125	0	0	0	113.546	64.5496	1	0	0	0	0	1	0			0	0	0	1	1	1.43
750	5	2014-05-28	0	7	60	64	0.723982	52	-12	0.8125	0	0	0	116.413	88.5324	1	0	1	0	0	1	0			1	0	1	1	1	1.04
751	3	2015-08-21	0	66	52	63	0.71267	51	-12	0.809524	0	0	0	124.8	92.2447	1	0	0	0	0	0	0			0	0	0	1	1	1.49
752	4	2017-02-06	0	71	80	107	1.21041	94	-13	0.878505	0	0	0	49.9229	69.769	0	0	0	0	0	1	1	3		1	0	0	2	1	1.72
753	5	2017-05-12	1	7	61	106	1.1991	93	-13	0.877358	0	0	0	65.0137	54.2806	0	0	0	0	0	0	0			1	0	0	1	1	1.11
754	6	2015-05-27	1	67	70	105	1.18778	92	-13	0.87619	0	0	0	47.1884	45.6959	0	0	1	0	0	1	0			1	0	0	2	1	1.15
755	5	2017-01-23	0	52	56	104	1.17647	91	-13	0.875	0	0	0	66.1875	49.9402	1	0	0	0	0	1	0			0	0	0	1	1	1.13
756	5	2016-01-29	0	62	64.4654	100	1.13122	87	-13	0.87	0	0	0	69.3462	60.1296	0	0	1	0	0	0	0			0	0	0	1	1	1.1732
757	4	2016-09-02	0	80	44	92	1.04072	79	-13	0.858696	0	0	0	77.472	47.2156	0	0	0	0	0	0	0	2		0	0	0	1	1	0.99
758	5	2017-02-20	1	35	48	83	0.938914	70	-13	0.843373	0	0	0	85.611	52.9632	0	0	1	0	0	0	0			0	0	0	1	1	1.4
759	4	2014-05-05	0	68	64.4654	76	0.859729	63	-13	0.828947	0	0	0	96.8833	84.6845	1	0	1	0	0	1	0		1	1	0	0	1	1	1.62
760	5	2015-05-08	0	65	54	74	0.837104	61	-13	0.824324	0	0	0	97.8296	67.1076	0	0	1	0	0	1	0			0	0	0	1	1	1.4
761	4	2016-06-29	1	71	65	60	0.678733	47	-13	0.783333	0	0	0	127.317	108.302	1	0	0	0	0	1	0			0	0	1	1	1	0.93
762	4	2015-05-27	1	45	64.4654	147	1.6629	133	-14	0.904762	0	0	0	45.2832	43.8946	0	0	0	0	0	1	0			0	0	0	1	1	1.08
763	6	2016-03-21	1	42	52	143	1.61765	129	-14	0.902098	0	0	0	43.9377	27.0717	0	0	0	0	0	1	0			1	0	1	1	1	1.24
764	7	2015-07-08	0	72	70	134	1.51584	120	-14	0.895522	0	0	0	35.0341	32.3995	1	0	1	0	0	1	0		1	1	0	0	2	1	1.09
765	4	2016-11-23	0	59	71	115	1.3009	101	-14	0.878261	0	0	0	45.7185	56.8375	1	0	1	0	0	0	0			0	0	0	2	1	1.27
766	6	2013-06-03	0	69	70	110	1.24434	96	-14	0.872727	0	0	0	44.8264	44.1828	0	0	0	0	0	1	0			1	0	0	2	1	1.12
767	4	2016-06-22	0	35	78	107	1.21041	93	-14	0.869159	0	0	0	49.8944	67.9164	1	0	0	0	0	0	0			0	0	0	2	1	1.1732
768	5	2015-04-08	1	45	71	103	1.16516	89	-14	0.864078	0	0	0	50.1206	56.3956	0	0	0	0	0	1	0			0	0	0	2	1	1.45
769	3	2015-05-13	0	23	77	102	1.15385	88	-14	0.862745	0	0	0	54.5529	76.501	0	1	0	0	0	1	0			0	0	0	2	1	1.16
770	5	2016-05-01	1	72	64.4654	97	1.09729	83	-14	0.85567	0	0	0	71.6968	61.5198	0	0	0	0	0	1	1	3		0	0	1	1	1	1.08
771	3	2015-06-26	1	74	86	94	1.06335	80	-14	0.851064	0	0	0	58.7996	88.631	1	0	1	0	0	1	0			0	0	0	2	1	1.09
772	5	2011-10-12	0	5	95	89	1.00679	75	-14	0.842697	0	0	0	59.2551	86.9321	0	0	0	0	0	1	0			1	0	0	2	1	1.23
773	6	2017-01-04	1	53	58	84	0.950226	70	-14	0.833333	0	0	0	81.8872	54.198	0	0	1	0	0	1	1	3		0	0	0	1	1	0.46
774	4	2016-06-29	0	35	81	80	0.904977	66	-14	0.825	0	0	0	69.639	93.7558	1	0	0	0	0	1	0			1	0	1	2	1	1.32
775	3	2016-12-12	0	51	70	80	0.904977	66	-14	0.825	0	0	0	70.0104	82.2344	0	0	1	0	0	1	0			0	0	0	2	1	1.1732
776	5	2015-03-13	0	79	64.4654	78	0.882353	64	-14	0.820513	0	0	0	92.7351	78.3291	0	0	0	0	0	1	0			0	0	0	1	1	1.43
777	4	2015-12-07	1	68	80	78	0.882353	64	-14	0.820513	0	0	0	71.0453	92.4213	0	0	0	0	0	1	0			0	0	0	2	1	1.31
778	2	2017-03-13	1	64	65	76	0.859729	62	-14	0.815789	0	0	0	104.461	104.487	1	0	0	0	0	1	0			1	0	0	1	1	1.06
779	3	2014-09-24	0	63	63	74	0.837104	60	-14	0.810811	0	0	0	107.087	102.749	0	0	0	0	0	1	0	1		1	0	0	1	1	0.94
780	4	2016-10-09	1	57	72	72	0.81448	58	-14	0.805556	0	0	0	76.1503	83.4003	0	0	0	0	0	1	0			0	0	0	2	1	1.31
781	6	2014-11-17	0	43	64.4654	70	0.791855	56	-14	0.8	0	0	0	100.982	71.9468	0	0	0	0	0	0	1	4		0	0	0	1	1	1.95
782	5	2015-07-24	0	68	58	66	0.746606	52	-14	0.787879	0	0	0	112.131	82.3258	1	0	1	0	0	1	0			0	0	0	1	1	1.07
783	6	2014-09-29	0	52	58	61	0.690045	47	-14	0.770492	0	0	0	117.835	72.2953	0	0	1	0	0	1	0			0	0	0	1	1	1.1732
784	5	2012-09-05	1	34	42.4	59	0.667421	45	-14	0.762712	0	0	0	126.702	65.2904	1	0	1	0	0	0	0	2		0	0	0	1	1	1.24
785	4	2011-12-21	0	4	71	168	1.90045	153	-15	0.910714	0	0	0	28.8624	36.2217	1	0	0	0	0	1	0			0	0	0	2	1	1.1732
786	5	2014-03-10	0	45	54	111	1.25566	96	-15	0.864865	0	0	0	60.9782	43.8073	1	0	0	0	0	0	0			0	0	0	1	1	1.1732
787	5	2015-05-06	1	74	70	108	1.22172	93	-15	0.861111	0	0	0	46.846	50.3012	0	0	0	0	0	0	0	2		0	0	0	2	1	1.1732
788	5	2015-03-04	0	51	57	106	1.1991	91	-15	0.858491	0	0	0	63.5977	45.9423	1	0	0	0	0	1	0		2	1	0	1	1	1	1.28
789	4	2016-01-11	0	66	75	100	1.13122	85	-15	0.85	0	0	0	53.0788	66.5752	1	0	0	0	0	0	0			0	0	0	2	1	0.9
790	3	2014-04-11	1	59	74	97	1.09729	82	-15	0.845361	0	0	0	56.1761	72.1275	1	0	1	0	0	0	0			0	0	0	2	1	2.11
791	3	2012-10-11	0	64	65	87	0.984163	72	-15	0.827586	0	0	0	86.0047	83.5351	1	0	0	0	0	1	0			0	0	0	1	1	1.1732
792	5	2016-03-21	1	65	64	87	0.984163	72	-15	0.827586	0	0	0	81.6544	69.3726	0	0	1	0	0	0	0			0	0	0	1	1	1.23
793	4	2013-02-23	1	55	60	86	0.972851	71	-15	0.825581	0	0	0	86.4511	76.2857	0	0	0	0	0	1	0		2	0	0	0	1	1	1.17
794	6	2016-06-08	1	60	61	83	0.938914	68	-15	0.819277	0	0	0	82.4768	55.4038	1	0	1	0	0	0	0			1	0	0	1	1	0.81
795	7	2017-01-09	1	69	47	81	0.91629	66	-15	0.814815	0	0	0	83.9115	40.6525	0	0	0	0	0	1	1	4		0	0	0	1	1	0.99
796	5	2015-11-18	0	7	76	77	0.871041	62	-15	0.805195	0	0	0	68.3699	72.3552	0	0	1	0	0	1	0			0	0	0	2	1	0.64
797	6	2017-01-11	0	68	62	65	0.735294	50	-15	0.769231	0	0	0	111.22	79.2569	1	0	1	0	0	1	1	4		0	0	0	1	1	1
798	3	2015-11-16	0	71	61	58	0.656109	43	-15	0.741379	0	0	0	139.832	122.99	0	0	1	0	0	1	0		1	1	0	0	1	1	0.93
799	5	2016-08-29	1	49	58	110	1.24434	94	-16	0.854545	0	0	0	61.2244	46.0948	0	0	0	0	0	0	0			0	0	0	1	1	1.04
800	4	2015-11-30	0	7	63	104	1.17647	88	-16	0.846154	0	0	0	67.4187	60.3436	1	0	0	0	0	1	0	2		0	0	0	1	1	0.74
801	2	2016-07-15	0	59	96	99	1.11991	83	-16	0.838384	0	0	0	58.5146	105.26	0	0	0	0	0	1	0			0	0	0	2	1	1.05
802	3	2015-06-26	0	76	84	89	1.00679	73	-16	0.820225	0	0	0	62.5748	91.239	0	0	1	0	0	1	0	2		1	0	0	2	1	0.84
803	6	2016-12-05	1	62	58	128	1.44796	111	-17	0.867188	0	0	0	50.8856	37.6648	1	0	0	0	0	0	0			0	0	1	1	1	1.05
804	6	2016-06-08	1	64	78	108	1.22172	91	-17	0.842593	0	0	0	45.5003	48.4115	0	0	1	0	0	1	1			0	0	0	2	1	0.93
805	6	2014-04-02	0	65	58	105	1.18778	88	-17	0.838095	0	0	0	63.6722	44.8393	1	0	1	0	0	1	0			1	0	0	1	1	1.1732
806	6	2010-08-25	0	25	65.4	104	1.17647	87	-17	0.836538	0	0	0	63.7052	48.0109	0	0	0	0	0	1	0			0	0	0	1	1	1.16
807	4	2016-05-13	0	27	57	98	1.1086	81	-17	0.826531	0	0	0	72.0576	57.5166	0	0	0	0	0	1	0			0	0	0	1	1	1.19
808	5	2014-09-26	0	65	64.4654	97	1.09729	80	-17	0.824742	0	0	0	70.4397	56.7201	1	0	0	0	0	0	0			1	0	0	1	1	1.24
809	5	2013-05-15	0	66	70	95	1.07466	78	-17	0.821053	0	0	0	53.6571	54.0433	1	0	1	0	0	1	0			0	0	0	2	1	1.45
810	5	2016-07-13	1	64	85	91	1.02941	74	-17	0.813187	0	0	0	56.8403	71.1311	0	0	0	0	0	1	0			0	0	0	2	1	0.83
811	3	2017-03-08	0	77	83	89	1.00679	72	-17	0.808989	0	0	0	61.8024	87.2437	1	0	0	0	0	0	0			0	0	0	2	1	1.72
812	5	2015-08-26	1	70	60	89	1.00679	72	-17	0.808989	0	0	0	78.4889	60.0309	0	0	1	0	0	1	0	2		1	0	1	1	1	1.1732
813	4	2016-04-11	1	54	110	87	0.984163	70	-17	0.804598	0	0	0	63.0331	116.117	0	0	0	0	0	0	0			0	0	0	2	1	1.1732
814	4	2017-03-03	0	66	80	86	0.972851	69	-17	0.802326	0	0	0	63.4577	83.7549	1	0	0	0	0	1	0	2		1	0	0	2	1	0.91
815	5	2016-07-18	1	67	61	80	0.904977	63	-17	0.7875	0	0	0	88.0975	65.507	1	0	0	0	0	0	0			0	0	0	1	1	1.44
816	5	2016-10-17	0	61	45	79	0.893665	62	-17	0.78481	0	0	0	91.3422	53.8915	1	0	0	0	0	0	0		1	1	0	1	1	1	1.15
817	5	2016-07-20	0	63	64	76	0.859729	59	-17	0.776316	0	0	0	94.8251	77.3031	1	0	0	0	0	0	0	2		0	0	0	1	1	1.25
818	5	2016-11-07	0	74	65	68	0.769231	51	-17	0.75	0	0	0	106.869	84.3617	1	0	0	0	0	0	0			0	0	0	1	1	0.81
819	5	2015-10-26	1	58	64.4654	62	0.701357	45	-17	0.725806	0	0	0	121.4	100.267	1	0	0	0	0	1	0	2		0	0	0	1	1	1.37
820	5	2016-03-25	1	47	75	252	2.85068	234	-18	0.928571	0	0	0	17.5329	22.5886	0	0	0	0	0	1	1	4		0	0	0	2	1	1.04
821	3	2016-11-16	0	52	58	127	1.43665	109	-18	0.858268	0	0	0	55.7752	51.5261	0	0	1	0	0	1	0			0	0	0	1	1	1
822	5	2016-09-12	1	26	59	122	1.38009	104	-18	0.852459	0	0	0	54.4998	42.9037	1	0	1	0	0	0	0			0	0	0	1	1	1.39
823	5	2015-08-19	0	64	62	119	1.34615	101	-18	0.848739	0	0	0	57.1225	49.9513	0	0	0	0	0	1	0			0	0	0	1	1	1.37
824	6	2014-12-24	0	68	50	110	1.24434	92	-18	0.836364	0	0	0	60.3364	36.8716	1	0	1	0	0	0	0			1	0	1	1	1	1.17
825	3	2015-02-13	0	47	69	110	1.24434	92	-18	0.836364	0	0	0	48.5047	59.035	1	0	1	0	0	0	0			0	0	0	2	1	1.38
826	6	2015-11-06	0	60	64.4654	109	1.23303	91	-18	0.834862	0	0	0	60.022	43.64	0	0	1	0	0	0	0			0	0	0	1	1	1.26
827	6	2017-03-06	1	58	60	90	1.0181	72	-18	0.8	0	0	0	76.5494	55.9642	0	0	0	0	0	1	0			0	0	0	1	1	1.56
828	6	2017-02-27	0	51	56	85	0.961538	67	-18	0.788235	0	0	0	80.5394	50.816	1	0	0	0	0	0	1			0	0	0	1	1	1.1732
829	5	2016-07-04	1	46	70	128	1.44796	109	-19	0.851562	0	0	0	38.3101	41.4909	0	0	0	0	0	0	0			0	0	0	2	1	1.1732
830	5	2017-03-03	0	48	71	127	1.43665	108	-19	0.850394	0	0	0	38.3356	40.759	1	0	1	0	0	1	0	2		1	0	0	2	1	0.84
831	6	2017-02-13	0	39	64.4654	112	1.26697	93	-19	0.830357	0	0	0	58.2755	42.9706	1	0	1	0	0	0	0			0	0	0	1	1	0.74
832	5	2016-11-21	0	39	60	102	1.15385	83	-19	0.813725	0	0	0	67.7748	54.8513	0	0	1	0	0	0	0			0	0	0	1	1	1.1732
833	5	2016-04-11	0	67	75	98	1.1086	79	-19	0.806122	0	0	0	52.8727	61.6407	0	0	1	0	0	0	0			0	0	0	2	1	1.34
834	5	2016-12-21	0	69	61	97	1.09729	78	-19	0.804124	0	0	0	71.6377	58.0096	0	0	0	0	0	1	0			0	0	0	1	1	0.89
835	5	2014-01-02	0	67	52	95	1.07466	76	-19	0.8	0	0	0	72.4115	47.5404	1	0		0	1	0	0			0	0	0	1	1	1.76
836	4	2015-05-08	0	66	77	95	1.07466	76	-19	0.8	0	0	0	55.2657	67.4336	1	0	0	0	0	0	0			0	0	0	2	1	1.11
837	5	2015-12-16	0	42	65	93	1.05204	74	-19	0.795699	0	0	0	74.2515	60.861	1	1	0	0	0	0	0			0	0	0	1	1	1.41
838	5	2017-03-15	1	60	64.4654	92	1.04072	73	-19	0.793478	0	0	0	55.9828	52.7316	0	0		0	0	1	0			0	0	0	2	1	1.1732
839	6	2017-03-01	0	56	58	85	0.961538	66	-19	0.776471	0	0	0	80.9907	54.3867	1	0	1	0	0	1	0	2		0	0	0	1	1	0.96
840	5	2015-11-18	0	53	54	76	0.859729	57	-19	0.75	0	0	0	94.9078	65.4683	1	0	0	0	0	1	0			1	0	1	1	1	0.94
841	5	2016-04-18	0	60	46	76	0.859729	57	-19	0.75	0	0	0	94.6594	55.1422	0	0	0	0	0	1	0		2	0	0	0	1	1	0.73
842	4	2014-12-12	0	50	70	76	0.859729	57	-19	0.75	0	0	0	72.2266	79.4548	0	0	0	0	0	1	0			0	0	0	2	1	1.6
843	6	2015-08-17	0	62	64	62	0.701357	43	-19	0.693548	0	0	0	116.376	81.5153	1	0	0	0	0	1	0			1	0	0	1	1	0.91
844	6	2015-11-16	1	62	73	136	1.53846	116	-20	0.852941	0	0	0	34.8642	35.9309	1	0	0	0	0	1	0			0	0	0	2	1	1.1732
845	5	2014-07-02	0	58	64.4654	120	1.35747	100	-20	0.833333	0	0	0	41.1409	40.1603	1	0	0	0	0	1	0		1	0	0	0	2	1	1.32
846	4	2016-04-07	0	38	54	103	1.16516	83	-20	0.805825	0	0	0	68.3413	52.6785	1	0	0	0	0	1	0	2		1	0	0	1	1	0.79
847	4	2015-12-30	1	56	71	82	0.927602	62	-20	0.756098	0	0	0	66.5137	76.0249	0	0	1	0	0	1	0			1	0	0	2	1	1.26
848	6	2015-12-02	1	71	64	79	0.893665	59	-20	0.746835	0	0	0	88.3747	65.5846	1	0	0	0	0	1	0			0	0	0	1	1	1.16
849	6	2016-05-11	0	65	94	109	1.23303	88	-21	0.807339	0	0	0	45.1254	58.5958	1	0	0	0	0	1	1	3	3	1	1	0	2	1	1.12
850	4	2017-01-16	1	55	64.4654	147	1.6629	126	-21	0.857143	0	0	0	46.098	46.5425	0	0	0	0	0	1	0			1	0	0	1	1	1.35
851	5	2013-06-19	0	61	77	115	1.3009	94	-21	0.817391	0	0	0	43.9041	53.6518	0	0	1	0	0	1	0			0	0	0	2	1	1.44
852	4	2014-12-17	0	56	82	92	1.04072	71	-21	0.771739	0	0	0	59.3722	82.9512	0	0	0	0	0	1	0			0	0	0	2	1	1.1732
853	5	2015-09-18	0	65	50	54	0.61086	33	-21	0.611111	0	0	0	141.992	88.3396	1	1	1	0	0	0	0		1	1	0	0	1	1	1.33
854	5	2014-03-11	1	6	50	166	1.87783	144	-22	0.86747	0	0	0	37.9144	25.7825	1	0	0	0	0	1	0			0	0	0	1	1	0.84
855	3	2016-11-21	0	37	85	130	1.47059	108	-22	0.830769	0	0	0	41.4404	66.9723	1	0	0	0	0	0	1	3		1	0	0	2	1	1.1732
856	6	2016-05-04	0	40	52	118	1.33484	96	-22	0.813559	0	0	0	55.5096	35.2782	1	0	0	0	0	0	0		1	1	0	0	1	1	1.08
857	7	2014-09-03	0	63	42	98	1.1086	76	-22	0.77551	0	0	0	67.6405	30.9414	1	1	1	0	0	1	1	4		0	0	0	1	1	0.65
858	3	2014-04-08	0	29	73	96	1.08597	74	-22	0.770833	0	0	0	56.7552	71.5635	0	0	0	0	0	1	0		1	1	0	0	2	1	1.46
859	6	2015-12-07	0	62	64	87	0.984163	65	-22	0.747126	0	0	0	78.5497	57.3639	1	0	0	0	0	1	0	2		1	0	0	1	1	1.19
860	4	2015-12-04	0	67	75	86	0.972851	64	-22	0.744186	0	0	0	63.8995	80.1634	0	0	0	0	0	0	0			0	0	0	2	1	1.1732
861	5	2014-05-29	1	66	66	74	0.837104	52	-22	0.702703	0	0	0	98.1027	82.9924	1	0		0	0	0	0			1	0	0	1	1	1.1732
862	4	2016-01-11	0	62	64.4654	67	0.757919	45	-22	0.671642	0	0	0	112.132	96.306	1	0	1	0	0	0	0			0	0	0	1	1	0.85
863	5	2014-04-18	0	62	57	63	0.71267	41	-22	0.650794	0	0	0	116.221	78.2523	0	0	1	0	0	1	0		1	1	0	0	1	1	1.01
864	7	2015-05-11	0	66	50	129	1.45928	106	-23	0.821705	0	0	0	48.9786	26.8919	1	0	0	0	0	0	0			0	0	0	1	1	1.68
865	6	2016-11-30	1	61	70	111	1.25566	88	-23	0.792793	0	0	0	44.2962	43.4368	1	0	0	0	0	1	0			0	0	0	2	1	1.23
866	5	2015-06-17	1	72	64.4654	108	1.22172	85	-23	0.787037	0	0	0	63.1027	54.3784	0	0	0	0	0	0	0		1	1	0	1	1	1	1.86
867	6	2015-11-23	0	68	52	103	1.16516	80	-23	0.776699	0	0	0	65.519	42.4028	1	1	1	0	0	1	0		1	1	0	0	1	1	1.26
868	6	2016-04-11	0	68	67	94	1.06335	71	-23	0.755319	0	0	0	72.403	58.1102	1	0	1	0	0	1	1	3		0	0	0	1	1	1.1732
869	5	2015-06-04	0	73	67	93	1.05204	70	-23	0.752688	0	0	0	56.4896	59.3425	1	0	1	0	0	0	0			0	0	0	2	1	1.1732
870	5	2015-11-09	1	60	66	88	0.995475	65	-23	0.738636	0	0	0	79.6514	67.2915	1	0	0	0	0	1	1	3		0	0	0	1	1	1.06
871	3	2015-11-18	0	68	79	82	0.927602	59	-23	0.719512	0	0	0	69.1906	94.5132	0	0	0	0	0	1	0			0	0	0	2	1	1.1732
872	4	2015-07-27	1	67	72	108	1.22172	84	-24	0.777778	0	0	0	48.0057	56.9211	0	1	0	0	0	1	0		1	1	0	1	2	1	1.73
873	5	2015-11-02	0	51	56	100	1.13122	76	-24	0.76	0	0	0	69.6334	53.1207	1	0	1	0	0	1	0	2		0	0	0	1	1	0.94
874	5	2017-02-20	0	58	84	92	1.04072	68	-24	0.73913	0	0	0	56.4077	71.0757	0	0	0	0	0	1	0			0	0	0	2	1	1.33
875	4	2016-03-02	0	28	93	123	1.3914	98	-25	0.796748	0	0	0	42.1914	69.0643	1	0	0	0	0	1	0			0	0	0	2	1	1.51
876	4	2017-01-18	0	71	72	101	1.14253	76	-25	0.752475	0	0	0	53.2662	66.1921	0	0	0	0	0	1	0			0	0	0	2	1	1.1732
877	6	2016-05-30	0	65	60	95	1.07466	70	-25	0.736842	0	0	0	71.4805	51.3192	0	0	0	0	0	1	0			0	0	0	1	1	1.53
878	4	2016-01-06	1	60	64.4654	91	1.02941	66	-25	0.725275	0	0	0	78.9453	71.5024	1	0	1	0	0	1	0			1	0	0	1	1	1.09
879	5	2016-10-28	1	64	55	82	0.927602	57	-25	0.695122	0	0	0	86.7543	61.2353	1	0	0	0	0	1	0			0	0	0	1	1	1.1732
880	6	2016-01-25	1	81	59	196	2.21719	170	-26	0.867347	0	0	0	30.8417	23.8084	0	0	0	0	0	1	0			1	0	0	1	1	0.97
881	5	2016-01-06	0	67	64.4654	89	1.00679	63	-26	0.707865	0	0	0	78.2726	63.6775	0	0	0	0	0	1	1		1	1	0	0	1	1	0.84
882	5	2014-11-24	1	50	68	83	0.938914	57	-26	0.686747	0	0	0	63.2193	62.4389	1	0	0	0	0	1	0			1	0	0	2	1	1.55
883	4	2014-07-09	1	5	158	80	0.904977	54	-26	0.675	0	0	0	69.2694	180.075	1	0	0	0	0	0	0			0	0	0	2	1	1.01
884	3	2015-10-28	1	7	76	149	1.68552	122	-27	0.818792	0	0	0	35.2507	51.7626	1	1	1	0	0	1	0		4	0	1	0	2	1	1.1732
885	5	2016-01-18	0	68	75	105	1.18778	78	-27	0.742857	0	0	0	48.2468	54.6946	1	0	1	0	0	1	0			0	0	0	2	1	1.23
886	6	2015-10-21	0	74	61	103	1.16516	76	-27	0.737864	0	0	0	64.437	45.2913	0	0	1	0	0	1	0			0	0	0	1	1	0.85
887	3	2017-02-08	1	49	57	92	1.04072	65	-27	0.706522	0	0	0	80.8517	69.7645	1	1	0	1	0	1	0			1	0	0	1	1	1.16
888	4	2013-05-31	0	52	66	159	1.79864	131	-28	0.823899	0	0	0	41.279	41.249	1	0	0	0	0	0	0			0	0	0	1	1	1.05
889	5	2016-03-16	0	69	85	130	1.47059	102	-28	0.784615	0	0	0	38.1414	52.5568	1	0	1	0	0	1	1			0	0	0	2	1	1.1732
890	5	2017-01-04	0	48	55	99	1.11991	71	-28	0.717172	0	0	0	69.0458	48.2515	0	0	1	0	0	1	0			1	0	0	1	1	0.86
891	5	2016-05-06	0	76	53	86	0.972851	58	-28	0.674419	0	0	0	80.9614	52.6797	1	0	0	0	0	1	0			1	0	0	1	1	1.19
892	6	2013-02-18	0	44	49	82	0.927602	54	-28	0.658537	0	0	0	83.7581	45.4515	1	0	0	0	0	1	0			0	0	0	1	1	0.82
893	6	2016-01-04	0	43	67	82	0.927602	54	-28	0.658537	0	0	0	84.1982	64.1433	1	0	1	0	0	0	0			0	0	0	1	1	1.1732
894	7	2015-08-31	0	32	64.4654	151	1.70814	122	-29	0.807947	0	0	0	40.995	30.429	0	0	0	0	0	1	0			0	0	0	1	1	1.36
895	6	2015-11-16	0	49	67	118	1.33484	89	-29	0.754237	0	0	0	55.4299	45.0841	0	0	0	0	0	1	0			0	0	0	1	1	1.1732
896	3	2015-10-10	0	64	77	147	1.6629	117	-30	0.795918	0	0	0	34.73	49.371	0	0	0	0	0	1	0	2		0	0	1	2	1	1.39
897	3	2013-02-27	1	44	75	128	1.44796	98	-30	0.765625	0	0	0	41.5151	57.9057	1	0	1	0	0	1	0			0	0	0	2	1	1.1732
898	4	2014-03-14	0	48	62	101	1.14253	71	-30	0.70297	0	0	0	70.6418	63.8857	1	0	1	0	0	1	0		2	0	0	0	1	1	1.1732
899	5	2015-07-10	1	12	64	110	1.24434	79	-31	0.718182	0	0	0	61.2017	50.7732	1	0	1	0	0	0	0			0	0	0	1	1	0.75
900	6	2016-03-28	1	32	64.4654	94	1.06335	63	-31	0.670213	0	0	0	72.3773	55.8035	0	0	0	0	0	1	0			1	0	0	1	1	0.8
901	6	2015-12-02	0	22	64.4654	153	1.73077	121	-32	0.79085	0	0	0	41.567	35.682	1	0	1	0	0	1	0			0	0	0	1	1	0.65
902	6	2015-10-14	0	72	54	112	1.26697	80	-32	0.714286	0	0	0	59.5003	40.5601	0	0	0	0	0	1	0			0	0	0	1	1	0.94
903	5	2015-12-11	0	32	68	89	1.00679	57	-32	0.640449	0	0	0	59.0415	61.3382	1	0	0	0	0	1	0			0	0	0	2	1	1.57
904	5	2016-12-12	0	68	51	127	1.43665	94	-33	0.740157	0	0	0	51.7245	34.6387	1	1	0	0	0	1	0	2		0	0	0	1	1	0.9
905	5	2016-10-18	1	46	55	115	1.3009	82	-33	0.713043	0	0	0	58.1048	41.6106	1	0	0	0	0	1	0			0	0	0	1	1	0.91
906	5	2014-12-31	0	56	68	111	1.25566	78	-33	0.702703	0	0	0	45.9371	49.957	1	0	0	0	0	1	0		1	0	0	0	2	1	1.1732
907	5	2017-02-08	1	34	55	94	1.06335	61	-33	0.648936	0	0	0	73.8937	52.7528	1	1	1	0	0	0	0			1	0	0	1	1	1.08
908	4	2016-10-12	0	58	50	89	1.00679	56	-33	0.629213	0	0	0	80.6421	55.8349	1	0	0	0	0	1	0			0	0	0	1	1	1.47
909	7	2015-11-09	0	66	53	157	1.77602	123	-34	0.783439	0	0	0	39.2247	24.1984	1	0	0	0	0	0	0			0	0	0	1	1	1.72
910	5	2015-07-03	0	50	58	148	1.67421	114	-34	0.77027	0	0	0	43.7306	35.2127	1	0	1	0	0	1	0	2		1	0	0	1	1	1.11
911	5	2016-06-01	1	45	61	162	1.83258	127	-35	0.783951	0	0	0	40.0323	36.1667	1	0	1	0	0	1	0		1	0	0	0	1	1	0.8
912	3	2014-07-18	0	31	65	105	1.18778	68	-37	0.647619	0	0	0	69.0535	68.7525	0	0	1	0	0	1	0		1	1	0	1	1	1	1.07
913	5	2012-07-23	0	24	49	122	1.38009	84	-38	0.688525	0	0	0	54.9839	37.0559	0	0	0	0	0	1	0	2		0	0	0	1	1	1.1732
914	5	2013-03-04	1	75	75	147	1.6629	106	-41	0.721088	0	0	0	32.4516	37.5884	0	1	0	0	0	1	0			1	0	0	2	1	1.15
915	2	2016-12-28	0	68	85	132	1.49321	91	-41	0.689394	0	0	0	41.4015	68.1762	0	0	1	0	0	0	1	4		0	0	0	2	1	1.1732
916	4	2012-03-30	0	49	53.6	104	1.17647	61	-43	0.586538	0	0	0	67.5275	51.6347	0	0	1	0	0	1	0	2		1	0	0	1	1	1.1732
917	6	2016-11-18	1	63	77	181	2.04751	137	-44	0.756906	0	0	0	24.9103	27.4128	1	0	0	0	0	0	1			0	0	0	2	1	1.3
918	6	2009-04-29	1	63	64	201	2.27376	155	-46	0.771144	0	0	0	30.1599	26.1455	1	0	0	0	0	1	0			0	0	0	1	1	1.1732
919	5	2016-03-04	0	48	64.4654	129	1.45928	81	-48	0.627907	0	0	0	51.7034	46.6642	0	0	0	0	0	1	0			0	0	0	1	1	0.97
920	5	2012-01-20	1	51	71	351	3.97059	296	-55	0.843305	0	0	0	11.8665	14.7834	0	0	0	0	0	1	0			0	0	0	2	1	1.15
921	6	2016-04-11	1	59	74	140	1.58371	85	-55	0.607143	0	0	0	33.5204	34.1583	0	0	0	0	0	1	0			0	0	0	2	1	1.1732
922	6	2017-03-22	0	29	64.4654	158	1.78733	100	-58	0.632911	0	0	0	29.5146	28.3235	0	0	0	0	0	1	0			0	0	0	2	1	1.1732
923	4	2015-12-04	0	42	82	162	1.83258	102	-60	0.62963	0	0	0	30.6544	46.014	0	1	1	0	0	0	0			0	0	0	2	1	1.1732
924	6	2015-07-17	1	53	59	161	1.82127	96	-65	0.596273	0	0	0	39.1207	30.7432	1	0	0	0	0	0	0			1	0	0	1	1	1.16
925	5	2016-10-28	0	62	51	73	0.825792	4	-69	0.0547945	0	0	0	100.797	68.0147	0	0	1	0	0	1	1	3		0	0	0	1	1	0.39
926	5	2013-03-04	1	57	75	167	1.88914	95	-72	0.568862	0	0	0	28.33	34.8601	1	0	1	0	0	1	0			0	0	0	2	1	1.03
927	4	2015-01-09	0	60	65	113	1.27828	3	-110	0.0265487	0	0	0	61.5361	58.208	1	0	0	0	0	0	0			0	0	0	1	1	1.08
928	6	2016-03-21	1	33	64.4654	479	5.41855	360	-119	0.751566	0	0	0	11.0104	10.7165	1	0	0	0	0	1	0		1	0	0	0	1	1	1.2
929	6	2015-05-22	1	58	65	128	1.44796	8	-120	0.0625	0	0	0	50.9253	42.383	1	0	0	0	0	0	0			1	0	0	1	1	0.6
930	6	2015-04-08	0	38	64.4654	90	1.0181	256	166	2.84444	1	1	1	56.5881	50.1166	0	0	0	0	0	0	0			0	0	1	2	0	1.2
931	6	2014-09-04	0	50	60	151	1.70814	252	101	1.66887	1	1	1	42.0886	33.1837	1	0	0	0	0	1	0			0	0	0	1	0	0.91
932	5	2014-04-01	1	58	75	95	1.07466	169	74	1.77895	1	1	1	53.8025	58.6642	0	1	1	0	0	0	0			0	0	0	2	0	1.1732
933	6	2016-10-14	1	45	64.4654	78	0.882353	151	73	1.9359	1	1	1	90.541	70.3502	0	0	0	0	0	0	0		1	0	0	0	1	0	0.94
934	6	2011-08-05	1	73	51.8	106	1.1991	173	67	1.63208	1	1	1	62.4758	37.8799	0	0	0	0	1	0	1			0	0	0	1	0	1.01
935	4	2015-12-04	0	26	49	120	1.35747	179	59	1.49167	1	1	1	57.1468	40.6527	0	0	0	0	0	0	0			0	0	1	1	0	1.1732
936	5	2015-04-01	1	4	93	105	1.18778	157	52	1.49524	1	1	1	48.4495	69.0799	0	0	0	0	0	0	0			0	0	0	2	0	1.53
937	7	2015-12-14	1	50	45	102	1.15385	154	52	1.5098	1	1	1	63.5108	28.0494	1	1	0	0	0	0	0			0	0	0	1	0	1.61
938	5	2015-02-02	0	43	105	108	1.22172	158	50	1.46296	1	1	1	47.0956	77.1724	1	0	0	0	0	0	0			0	0	0	2	0	1.43
939	4	2015-12-16	1	68	62	370	4.18552	419	49	1.13243	1	1	1	15.5472	16.5428	0	0	0	0	0	1	0			0	0	0	1	0	0.65
940	5	2015-09-30	0	73	67	84	0.950226	132	48	1.57143	1	1	1	84.715	74.0806	0	0	0	0	0	1	0			0	0	0	1	0	1.1732
941	4	2015-07-22	1	74	60	62	0.701357	110	48	1.77419	1	1	1	123.244	98.5499	0	0	1	0	0	0	1	4		1	0	0	1	0	1.12
942	7	2016-09-23	0	60	56	158	1.78733	203	45	1.28481	1	1	1	38.9858	25.6185	0	0	0	0	0	1	0			0	0	0	1	0	1.17
943	6	2016-06-01	0	55	64.4654	157	1.77602	200	43	1.27389	1	0	0	40.087	33.6127	0	0	0	0	0	1	0		1	0	0	0	1	0	0.88
944	6	2010-08-13	1	62	60	97	1.09729	140	43	1.4433	1	0	0	69.9343	50.8582	0	0	1	0	0	1	0			0	0	0	1	0	0.92
945	4	2015-07-06	0	65	73	60	0.678733	101	41	1.68333	1	1	0	97.1119	112.839	0	0	0	0	0	0	0			0	0	0	2	0	1.35
946	6	2015-04-01	0	46	50	100	1.13122	139	39	1.39	1	0	0	67.5059	41.0683	0	0	1	0	0	0	0		2	0	0	0	1	0	1.1732
947	6	2015-05-27	0	46	52	73	0.825792	112	39	1.53425	1	1	0	95.6197	53.6011	0	0	0	0	0	0	1	3		1	0	0	1	0	1.5
948	5	2012-06-11	0	66	64.4654	65	0.735294	103	38	1.58462	1	1	0	112.456	87.0758	0	0	1	0	0	1	0	2		1	0	0	1	0	1.06
949	5	2015-10-12	0	41	74	118	1.33484	155	37	1.31356	1	0	0	42.5462	49.9027	0	0	1	0	0	1	0			1	0	0	2	0	1.22
950	6	2016-09-14	0	46	64.4654	102	1.15385	139	37	1.36275	1	0	0	65.3107	48.9862	0	0		0	0	1	0			1	0	0	1	0	0.92
951	4	2015-07-20	1	36	78	86	0.972851	123	37	1.43023	1	0	0	63.6753	82.5116	0	0	0	0	0	0	0			0	0	0	2	0	0.91
952	5	2015-08-10	1	57	62	49	0.554299	86	37	1.7551	1	1	0	157.552	116.756	0	0	0	0	0	1	0			0	0	0	1	0	1.1732
953	5	2015-01-28	1	73	63	115	1.3009	151	36	1.31304	1	0	0	59.6268	53.2245	0	0	0	0	0	1	0			0	0	0	1	0	1.3
954	5	2007-07-10	1	48	66	111	1.25566	147	36	1.32432	1	0	0	60.9757	53.5322	0	0	1	0	0	0	1	4		0	0	0	1	0	0.97
955	4	2011-12-22	1	7	51.7	128	1.44796	163	35	1.27344	1	0	0	52.7803	39.4824	0	1	1	0	0	1	1	4	2	0	0	0	1	0	0.99
956	5	2015-04-22	1	60	53	112	1.26697	147	35	1.3125	1	0	0	60.5199	43.1438	0	0	0	0	0	1	0			1	0	0	1	0	1.07
957	3	2015-12-18	0	30	90	111	1.25566	146	35	1.31532	1	0	0	48.3439	77.762	0	0	0	0	0	1	0			0	0	0	2	0	1.01
958	3	2014-03-24	0	59	60	33	0.373303	68	35	2.06061	1	1	0	268.146	212.774	0	0	0	0	0	0	0			0	0	0	1	0	1.1732
959	5	2016-11-02	0	43	68	71	0.803167	105	34	1.47887	1	0	0	77.1593	78.9891	0	0	0	0	0	1	0		2	0	0	0	2	0	1.6
960	3	2015-09-30	0	74	86	102	1.15385	135	33	1.32353	1	0	0	54.5416	85.4041	0	0	1	0	0	0	0			0	0	0	2	0	0.95
961	5	2015-01-28	0	48	49	81	0.91629	114	33	1.40741	1	0	0	88.7799	57.3245	1	0	0	0	0	1	0			1	0	0	1	0	1.45
962	5	2015-08-24	0	53	42	95	1.07466	127	32	1.33684	1	0	0	73.6692	41.4556	0	0	1	0	0	0	0			0	0	0	1	0	1.14
963	5	2015-08-17	1	68	86	84	0.950226	116	32	1.38095	1	0	0	63.2893	83.0998	0	0	0	0	0	0	1	4		0	0	0	2	0	1.07
964	5	2014-11-19	0	72	63	48	0.542986	78	30	1.625	1	1	0	159.785	115.985	0	0	1	0	0	0	0			1	0	0	1	0	0.78
965	5	2015-04-29	1	46	60	178	2.01357	207	29	1.16292	0	0	0	35.0268	29.0426	0	0	0	0	0	1	0			1	0	0	1	0	1.06
966	5	2016-04-13	0	69	65	158	1.78733	187	29	1.18354	0	0	0	40.5616	37.0023	0	0	0	0	0	1	0			1	0	0	1	0	1.37
967	5	2015-07-17	1	53	64.4654	88	0.995475	117	29	1.32955	1	0	0	81.1102	70.8745	0	0	1	0	0	1	1	4		0	0	0	1	0	0.24
968	4	2015-07-06	0	45	64.4654	81	0.91629	110	29	1.35802	1	0	0	92.7926	87.4296	0	0	1	0	0	0	0			0	0	0	1	0	1.64
969	6	2016-12-07	0	70	56	85	0.961538	113	28	1.32941	1	0	0	81.5848	54.6587	0	0	0	0	0	1	0			1	0	0	1	0	1.11
970	4	2016-11-21	0	63	79	77	0.871041	105	28	1.36364	1	0	0	72.141	92.5687	0	0	0	0	0	1	0			0	0	0	2	0	1.54
971	3	2015-05-06	0	58	58	83	0.938914	110	27	1.3253	1	0	0	93.7047	84.1535	0	0	1	0	0	0	0	2		0	0	0	1	0	0.76
972	5	2015-05-29	0	59	60	75	0.848416	102	27	1.36	1	0	0	97.622	77.644	0	0	1	0	0	1	0			0	0	0	1	0	1.44
973	3	2011-06-30	1	59	69	57	0.644796	84	27	1.47368	1	0	0	103.333	113.186	0	0	0	0	0	1	0			0	0	0	2	0	1.15
974	6	2016-01-20	1	37	61	611	6.91176	637	26	1.04255	0	0	0	8.22797	7.46443	0	0	0	0	0	1	0			1	0	0	1	0	1.1732
975	6	2015-04-27	0	56	64.4654	121	1.36878	147	26	1.21488	0	0	0	54.4548	44.9537	0	0	0	0	0	1	1	3		0	0	0	1	0	1.03
976	6	2015-04-03	0	73	74	110	1.24434	136	26	1.23636	0	0	0	44.6722	45.8247	0	0	0	0	0	0	0			0	0	0	2	0	1.09
977	7	2014-11-12	0	66	55	91	1.02941	117	26	1.28571	1	0	0	73.3304	42.2082	0	0	1	0	0	1	0			0	0	0	1	0	0.85
978	4	2015-01-28	0	28	83	76	0.859729	102	26	1.34211	1	0	0	72.8681	96.996	0	0	0	0	0	0	0			0	0	0	2	0	1.25
979	2	2016-11-14	0	7	64.4654	69	0.780543	95	26	1.37681	1	0	0	118.274	116.953	0	0	0	0	0	0	0			1	0	0	1	0	0.94
980	5	2016-01-18	0	68	70	56	0.633484	82	26	1.46429	1	0	0	100.281	98.3425	0	0	1	0	0	0	0			0	0	0	2	0	1.17
981	5	2012-02-20	0	64	66.5	53	0.599548	79	26	1.49057	1	0	0	142.171	109.609	0	0	0	0	0	1	0		1	1	0	0	1	0	0.93
982	4	2016-01-07	0	68	75	49	0.554299	75	26	1.53061	1	1	0	122.94	142.804	0	0	1	0	0	0	0			1	0	0	2	0	1.02
983	6	2015-09-23	1	7	68	115	1.3009	140	25	1.21739	0	0	0	42.3734	39.9284	0	0	1	0	0	1	0		1	1	0	0	2	0	1.1732
984	7	2015-04-29	0	55	64.4654	111	1.25566	136	25	1.22523	0	0	0	58.2693	40.3726	1	0	0	0	0	1	0			0	0	0	1	0	1.35
985	4	2015-10-10	0	76	65	87	0.984163	112	25	1.28736	1	0	0	82.73	74.0755	0	0	0	0	0	0	0			0	0	0	1	0	1.07
986	4	2014-01-27	0	69	60	51	0.576923	76	25	1.4902	1	0	0	157.109	126.569	0	0	0	0	0	0	0			0	0	0	1	0	1.56
987	5	2012-04-19	1	64	53	35	0.395928	60	25	1.71429	1	1	0	233.949	143.852	0	0	0	0	0	1	1	3		0	0	0	1	0	1.41
988	6	2016-07-27	1	63	73	97	1.09729	121	24	1.24742	0	0	0	51.7521	51.832	0	0	0	0	0	1	0			0	0	1	2	0	1.01
989	4	2012-06-24	1	3	76.5	89	1.00679	113	24	1.26966	1	0	0	59.8044	72.4732	0	0	0	0	0	1	0			0	0	0	2	0	1.04
990	6	2016-11-09	0	57	64.4654	78	0.882353	102	24	1.30769	1	0	0	90.5717	70.4698	0	0	0	0	0	1	0		1	1	0	1	1	0	1.1732
991	5	2015-08-17	0	69	70	74	0.837104	98	24	1.32432	1	0	0	73.181	76.4606	0	0	1	0	0	0	0			0	0	0	2	0	1.28
992	5	2016-11-25	1	65	59	70	0.791855	94	24	1.34286	1	0	0	103.618	75.2712	0	0	0	0	0	1	0	2		1	0	0	1	0	1.1732
993	5	2013-02-06	0	61	64.4654	63	0.71267	87	24	1.38095	1	0	0	117.817	94.1771	0	0	0	0	0	1	0		1	0	0	0	1	0	1.1732
994	5	2015-01-19	1	51	64.4654	38	0.429864	62	24	1.63158	1	1	0	211.789	158.161	0	1	0	0	0	1	0			0	0	0	1	0	1.6
995	5	2017-02-27	1	75	76	110	1.24434	133	23	1.20909	0	0	0	46.5312	56.8674	0	0	0	0	0	1	0			1	0	1	2	0	1.73
996	5	2017-01-16	0	62	49	92	1.04072	115	23	1.25	1	0	0	75.0159	45.8787	0	0	1	0	0	0	0			0	0	0	1	0	0.78
997	4	2015-07-17	0	38	73	87	0.984163	110	23	1.26437	1	0	0	63.3423	78.1437	0	0	1	0	0	1	0			0	0	0	2	0	1.02
998	4	2014-12-12	0	55	74	75	0.848416	98	23	1.30667	1	0	0	73.5602	85.9839	0	0	1	0	0	0	0			1	0	0	2	0	1.62
999	4	2016-12-14	1	46	80	74	0.837104	97	23	1.31081	1	0	0	74.0746	91.4792	1	0	1	0	0	1	0			0	0	0	2	0	1.85
1000	6	2012-03-19	0	56	59.8	67	0.757919	90	23	1.34328	1	0	0	107.191	73.4061	0	0	1	0	0	0	1	4		0	0	0	1	0	0.56
1001	6	2012-09-17	0	58	76	128	1.44796	150	22	1.17188	0	0	0	37.0098	37.3145	0	0	1	0	0	0	1	3		1	0	0	2	0	0.71
1002	4	2013-03-06	1	68	65	74	0.837104	96	22	1.2973	1	0	0	100.705	90.1144	1	0	1	0	0	1	0			0	0	0	1	0	1.32
1003	5	2012-08-09	0	55	61.5	104	1.17647	125	21	1.20192	0	0	0	67.0403	57.7054	0	0	0	0	0	1	0			0	0	0	1	0	1.55
1004	5	2014-01-23	0	62	65	82	0.927602	103	21	1.2561	1	0	0	85.8418	68.9533	0	0	0	0	0	1	0			0	0	0	1	0	1.03
1005	5	2016-01-18	0	72	75	80	0.904977	101	21	1.2625	1	0	0	65.6029	69.6584	0	0	1	0	0	1	0			0	0	0	2	0	1.33
1006	6	2014-03-11	1	6	70	79	0.893665	100	21	1.26582	1	0	0	66.0587	63.4129	0	0	1	0	0	1	0			1	0	0	2	0	1.08
1007	5	2016-01-20	1	42	81	77	0.871041	98	21	1.27273	1	0	0	69.0647	80.836	0	0	0	0	0	0	0			0	0	0	2	0	1.31
1008	5	2015-03-18	1	61	64.4654	77	0.871041	98	21	1.27273	1	0	0	93.5357	77.3131	0	1	1	0	0	0	0		1	0	0	0	1	0	1.12
1009	4	2012-06-11	0	6	60	75	0.848416	96	21	1.28	1	0	0	99.1221	81.9765	0	0	1	0	0	1	0			0	0	0	1	0	1.49
1010	5	2016-11-14	1	66	64	73	0.825792	94	21	1.28767	1	0	0	99.3532	80.5389	0	0	0	0	0	0	1	3		0	0	0	1	0	1.1732
1011	4	2014-02-08	0	6	74	72	0.81448	93	21	1.29167	1	0	0	76.5723	87.4478	0	0	0	0	0	0	0			1	0	0	2	0	1.17
1012	5	2014-01-08	1	63	55	53	0.599548	74	21	1.39623	1	0	0	144.698	97.9458	0	0	0	0	0	0	0			0	0	0	1	0	1.1732
1013	5	2016-01-13	0	61	73	46	0.520362	67	21	1.45652	1	0	0	127.037	129.744	0	0	1	0	0	0	0			0	0	0	2	0	1.14
1014	4	2016-09-07	0	59	52	41	0.463801	62	21	1.5122	1	1	0	200.906	134.016	0	0	0	0	0	0	0			1	0	0	1	0	1.09
1015	6	2013-08-05	1	78	64.4654	80	0.904977	100	20	1.25	1	0	0	86.9631	64.6611	0	1	1	0	0	0	0			1	1	0	1	0	1.1732
1016	4	2015-06-05	0	49	104	88	0.995475	108	20	1.22727	0	0	0	61.1502	102.886	0	0	0	0	0	1	0			0	0	0	2	0	1.31
1017	6	2012-03-29	1	33	64.4654	73	0.825792	93	20	1.27397	1	0	0	97.1988	73.0656	0	0	0	0	0	0	0			0	0	0	1	0	1.1732
1018	6	2010-06-11	1	85	53	71	0.803167	91	20	1.28169	1	0	0	100.552	62.3679	0	0	0	0	0	0	0		2	1	0	0	1	0	0.89
1019	5	2016-09-26	0	46	57	70	0.791855	90	20	1.28571	1	0	0	104.405	75.1794	0	1	1	0	0	1	0		1	1	0	0	1	0	1.44
1020	7	2014-06-20	1	43	64.4654	63	0.71267	83	20	1.31746	1	0	0	111.756	69.8971	0	0	1	0	0	1	0			0	0	0	1	0	0.87
1021	3	2016-08-12	0	76	69	86	0.972851	105	19	1.22093	0	0	0	65.6796	79.2537	0	0	0	0	0	1	0			0	0	0	2	0	1.1732
1022	5	2016-03-30	0	69	50	69	0.780543	88	19	1.27536	1	0	0	105.427	64.9184	0	0	0	0	0	1	0	2		0	0	0	1	0	1.18
1023	5	2015-01-14	0	68	54	46	0.520362	65	19	1.41304	1	0	0	167.061	101.499	0	0	0	0	0	0	0			0	0	1	1	0	1.19
1024	4	2016-03-21	1	67	64	99	1.11991	117	18	1.18182	0	0	0	72.7563	68.6422	1	0	0	0	0	0	0			0	0	1	1	0	1.14
1025	5	2014-03-24	1	63	73	95	1.07466	113	18	1.18947	0	0	0	54.3156	59.6199	0	0	0	0	0	0	0			0	0	0	2	0	1.33
1026	5	2015-04-20	0	75	64	73	0.825792	91	18	1.24658	0	0	0	100.431	84.1721	0	0	0	0	0	0	0			0	0	0	1	0	1.4
1027	6	2015-12-16	1	63	64.4654	65	0.735294	83	18	1.27692	1	0	0	110.115	77.9682	0	0		0	0	1	0			0	0	0	1	0	0.81
1028	5	2016-01-08	0	73	60	63	0.71267	81	18	1.28571	1	0	0	118.947	91.1487	0	0	0	0	0	1	0			1	0	0	1	0	1.03
1029	5	2016-02-29	1	43	75	60	0.678733	78	18	1.3	1	0	0	92.2579	96.7628	0	0	0	0	0	1	0			0	0	0	2	0	1.1732
1030	2	2015-11-20	0	76	72	60	0.678733	78	18	1.3	1	0	0	103.062	127.553	0	0	0	0	0	0	0			0	0	0	2	0	2.2
1031	5	2015-04-15	0	68	60	56	0.633484	74	18	1.32143	1	0	0	133.2	92.8618	0	0		0	0	1	0			0	0	0	1	0	1.34
1032	6	2017-01-13	1	37	48	52	0.588235	70	18	1.34615	1	0	0	143.296	75.0267	0	0	1	0	0	0	0			0	0	0	1	0	1.76
1033	5	2016-12-16	0	71	53	47	0.531674	65	18	1.38298	1	0	0	165.345	104.138	0	0	0	0	0	0	0			1	0	0	1	0	0.87
1034	4	2013-02-27	1	64	65	39	0.441176	57	18	1.46154	1	0	0	213.801	178.527	0	0	0	0	0	0	0			1	0	0	1	0	0.96
1035	4	2015-06-05	0	73	62	106	1.1991	123	17	1.16038	0	0	0	67.8615	63.8077	0	0	0	0	0	1	0			0	0	0	1	0	1.1732
1036	4	2015-07-08	0	68	70	97	1.09729	114	17	1.17526	0	0	0	55.6935	66.6131	0	0	0	0	0	0	0			0	0	0	2	0	1.17
1037	4	2016-07-27	0	67	76	84	0.950226	101	17	1.20238	0	0	0	64.005	76.6034	0	0	0	0	0	1	0	2		1	0	1	2	0	1.38
1038	6	2016-12-16	0	69	48	75	0.848416	92	17	1.22667	0	0	0	94.1182	52.6665	0	0	1	0	0	0	0		1	1	0	0	1	0	1.06
1039	5	2016-02-22	0	75	60	68	0.769231	85	17	1.25	1	0	0	106.729	77.3945	0	1	0	0	0	1	0			1	0	0	1	0	1.25
1040	5	2012-03-26	0	32	64	67	0.757919	84	17	1.25373	1	0	0	110.666	91.0159	0	0	0	0	0	0	1			0	0	0	1	0	1.39
1041	4	2016-04-01	0	67	59	63	0.71267	80	17	1.26984	1	0	0	122.88	100.192	0	0	0	0	0	0	1	3		0	0	0	1	0	0.84
1042	6	2016-12-26	0	48	54	61	0.690045	78	17	1.27869	1	0	0	118.164	68.4678	0	0	0	0	0	0	0			0	0	0	1	0	1.05
1043	5	2015-03-03	0	39	57	53	0.599548	70	17	1.32075	1	0	0	144.809	101.822	0	0		0	0	1	1	4		0	0	0	1	0	1.06
1044	3	2017-03-20	1	67	66	53	0.599548	70	17	1.32075	1	0	0	151.713	137.612	0	0	0	0	0	0	0			1	0	0	1	0	0.85
1045	5	2015-01-28	0	51	57	45	0.50905	62	17	1.37778	1	0	0	173.705	116.549	0	0	0	0	0	0	0			0	0	0	1	0	1.03
1046	5	2015-10-21	1	37	65	43	0.486425	60	17	1.39535	1	0	0	180.865	131.691	0	0	0	0	0	1	0			0	0	0	1	0	1.57
1047	6	2015-09-07	0	73	69	152	1.71946	168	16	1.10526	0	0	0	30.6472	30.2872	0	0	1	0	0	0	0			0	0	0	2	0	1.51
1048	4	2015-12-14	0	73	87	110	1.24434	126	16	1.14545	0	0	0	48.3057	73.5942	0	0	0	0	0	0	0			0	0	0	2	0	1.71
1049	6	2016-12-28	0	71	65	103	1.16516	119	16	1.15534	0	0	0	64.7381	49.6283	0	0	1	0	0	0	1	3		0	0	0	1	0	1.63
1050	5	2015-01-05	1	28	76	102	1.15385	118	16	1.15686	0	0	0	50.2072	58.656	1	0	1	0	0	1	0			0	0	0	2	0	1.58
1051	6	2015-04-20	1	41	74	88	0.995475	104	16	1.18182	0	0	0	57.4773	55.4896	0	0	0	0	0	1	0			0	0	0	2	0	1.42
1052	5	2014-09-10	0	34	63	83	0.938914	99	16	1.19277	0	0	0	86.2928	71.8503	1	0	0	0	0	0	0			0	0	0	1	0	1.2
1053	4	2016-12-05	1	66	76	81	0.91629	97	16	1.19753	0	0	0	68.4492	86.1607	0	0		0	0	0	0		3	1	0	0	2	0	0.74
1054	3	2016-07-06	0	66	70	80	0.904977	96	16	1.2	0	0	0	70.9993	85.2791	0	0	0	0	0	0	0			1	0	0	2	0	0.97
1055	4	2015-05-15	0	56	68	73	0.825792	89	16	1.21918	0	0	0	75.2518	78.8411	0	0	0	0	0	1	0			0	0	0	2	0	1.1732
1056	6	2015-02-11	0	58	57	71	0.803167	87	16	1.22535	0	0	0	99.3697	62.8216	0	0	0	0	0	1	0		1	0	0	0	1	0	1.1732
1057	5	2015-10-14	1	64	64.4654	62	0.701357	78	16	1.25806	1	0	0	121.247	99.7777	0	0	1	0	0	1	0			0	0	0	1	0	1.4
1058	3	2015-04-10	1	31	68	62	0.701357	78	16	1.25806	1	0	0	95.9007	108.574	0	0	1	0	0	0	0			0	0	0	2	0	1.28
1059	4	2014-05-28	1	66	70	61	0.690045	77	16	1.2623	1	0	0	93.5685	100.719	0	0	0	0	0	1	0			0	0	0	2	0	1.1732
1060	6	2011-11-14	0	54	59	58	0.656109	74	16	1.27586	1	0	0	126.363	82.7966	0	0	0	0	0	0	0			0	0	0	1	0	1.48
1061	6	2012-05-21	1	47	47	57	0.644796	73	16	1.2807	1	0	0	129.67	69.2023	1	0	1	0	0	1	0		1	0	0	0	1	0	1.14
1062	6	2013-05-17	0	63	64.4654	52	0.588235	68	16	1.30769	1	0	0	143.028	99.7205	0	0	1	0	0	1	1	4		0	0	0	1	0	1.18
1063	4	2017-02-27	0	74	56	49	0.554299	65	16	1.32653	1	0	0	162.843	119.12	0	1	0	0	0	1	0			1	0	0	1	0	1.14
1064	6	2015-12-23	0	62	50	37	0.418552	53	16	1.43243	1	0	0	213.77	114.132	0	0	0	0	0	0	1	4		1	0	0	1	0	1.54
1065	6	2016-12-23	1	48	40	420	4.75113	435	15	1.03571	0	0	0	12.7727	7.44291	0	0	1	0	0	1	0			0	0	0	1	0	1.23
1066	5	2015-08-12	1	71	61	166	1.87783	181	15	1.09036	0	0	0	38.1075	32.2384	0	0	0	0	0	0	0			1	0	0	1	0	1.1732
1067	4	2015-11-09	0	62	77	101	1.14253	116	15	1.14851	0	0	0	52.8988	69.3806	0	0	0	0	0	1	1			0	0	0	2	0	1.27
1068	6	2017-02-08	1	62	82	99	1.11991	114	15	1.15152	0	0	0	50.0692	53.9791	0	0	0	0	0	0	0			0	0	0	2	0	1.1732
1069	4	2017-01-23	0	53	61	96	1.08597	111	15	1.15625	0	0	0	75.0203	66.456	0	0	0	0	0	0	0			0	0	1	1	0	1
1070	5	2015-09-09	0	24	64	90	1.0181	105	15	1.16667	0	0	0	78.7151	67.7252	0	0	0	0	0	0	0	1		0	0	0	1	0	0.81
1071	4	2013-06-19	0	41	56	85	0.961538	100	15	1.17647	0	0	0	85.0299	65.4579	0	0	1	0	0	0	0			1	0	0	1	0	0.98
1072	6	2016-08-29	0	50	60	82	0.927602	97	15	1.18293	0	0	0	84.3007	57.8504	0	0	0	0	0	1	0			0	0	0	1	0	0.75
1073	5	2015-03-23	0	69	72	75	0.848416	90	15	1.2	0	0	0	71.4366	74.8738	0	0	1	0	0	1	0			0	0	0	2	0	1.01
1074	4	2014-06-03	0	58	64.4654	74	0.837104	89	15	1.2027	0	0	0	101.522	91.7293	0	0	0	0	0	1	1	3		0	0	0	1	0	1.15
1075	4	2013-07-12	0	48	62	73	0.825792	88	15	1.20548	0	0	0	101.524	84.8872	0	0	0	0	0	1	0			0	0	0	1	0	0.65
1076	5	2016-10-24	1	63	67	70	0.791855	85	15	1.21429	0	0	0	104.347	88.1594	0	0	0	0	0	0	0			0	0	0	1	0	1.1732
1077	3	2014-09-10	0	71	72	68	0.769231	83	15	1.22059	0	0	0	85.2942	102.141	0	0	0	0	0	0	0			0	0	0	2	0	1.1732
1078	5	2015-09-18	0	62	52	64	0.723982	79	15	1.23438	0	0	0	116.12	75.941	0	0	1	0	0	0	0			0	0	0	1	0	1.19
1079	5	2016-05-01	1	73	73	62	0.701357	77	15	1.24194	0	0	0	88.175	88.1313	0	0	0	0	0	0	0			0	0	0	2	0	1.43
1080	3	2015-08-17	0	65	68	62	0.701357	77	15	1.24194	0	0	0	95.8265	108.377	0	0	0	0	0	1	0			0	0	1	2	0	0.99
1081	5	2015-02-02	0	39	61	59	0.667421	74	15	1.25424	1	0	0	126.633	93.7059	0	0	0	0	0	0	0			0	0	0	1	0	1.1732
1082	5	2015-08-21	1	59	66	57	0.644796	72	15	1.26316	1	0	0	131.22	102.969	0	0	0	0	0	1	1			0	0	0	1	0	1.5
1083	4	2012-09-17	0	6	52.4	48	0.542986	63	15	1.3125	1	0	0	163.963	107.358	1	0	1	0	0	0	1	3		0	0	0	1	0	1.1732
1084	5	2015-11-20	1	75	53	36	0.40724	51	15	1.41667	1	0	0	225.607	137.716	0	0	0	0	0	1	0			0	0	0	1	0	1.1732
1085	5	2015-12-18	0	56	67	118	1.33484	132	14	1.11864	0	0	0	42.1811	43.5441	0	0	1	0	0	0	0			1	0	0	2	0	0.95
1086	5	2015-09-09	0	77	52	101	1.14253	115	14	1.13861	0	0	0	67.5417	44.9431	0	0	1	0	0	0	1	4		0	0	0	1	0	1.22
1087	6	2013-07-24	0	46	51	98	1.1086	112	14	1.14286	0	0	0	69.2145	43.1297	0	0	0	0	0	1	0			0	0	0	1	0	0.97
1088	5	2014-05-26	1	43	57	93	1.05204	107	14	1.15054	0	0	0	75.9478	58.8441	0	0	1	0	0	1	0			0	0	0	1	0	1.25
1089	4	2016-10-26	1	25	98	93	1.05204	107	14	1.15054	0	0	0	58.0876	95.4225	0	0	0	0	0	0	0			0	0	0	2	0	1.35
1090	5	2015-07-24	0	67	52	87	0.984163	101	14	1.16092	0	0	0	80.4288	52.7785	0	0	1	0	0	1	1	4		0	0	0	1	0	1.46
1091	4	2015-03-16	0	71	58	82	0.927602	96	14	1.17073	0	0	0	88.4755	69.8335	0	0	0	0	0	0	0			0	0	0	1	0	0.98
1092	6	2015-08-28	0	48	51	80	0.904977	94	14	1.175	0	0	0	86.0916	48.1827	0	0	0	0	0	0	1			0	0	0	1	0	1.1732
1093	6	2016-12-05	1	71	62	79	0.893665	93	14	1.17722	0	0	0	88.8782	65.5044	0	1	1	0	0	1	0		2	1	0	0	1	0	1.09
1094	5	2015-05-18	1	67	71	79	0.893665	93	14	1.17722	0	0	0	67.1945	69.7151	0	0	1	0	0	0	0		1	0	0	0	2	0	1.11
1095	3	2015-04-15	0	78	57	75	0.848416	89	14	1.18667	0	0	0	103.513	88.0218	0	0	0	0	0	1	0			1	0	1	1	0	1.37
1096	5	2014-11-24	1	50	80	68	0.769231	82	14	1.20588	0	0	0	80.7366	95.3496	1	0	0	0	0	1	0			0	0	0	2	0	1.44
1097	5	2012-09-26	0	55	64.4654	68	0.769231	82	14	1.20588	0	0	0	106.588	82.6347	0	0	1	0	0	0	0			1	0	0		0	1.1732
1098	7	2015-02-11	0	69	64.4654	65	0.735294	79	14	1.21538	0	0	0	108.096	69.1375	1	0	0	0	0	0	0			1	0	0	1	0	1.1732
1099	5	2016-01-04	0	69	53	58	0.656109	72	14	1.24138	0	0	0	128.838	81.9135	0	0	0	0	0	0	0	2		1	0	0	1	0	1.28
1100	5	2016-11-09	0	66	61	56	0.633484	70	14	1.25	1	0	0	134.18	97.7035	0	0	0	0	0	0	0			1	0	0	1	0	1.05
1101	4	2014-06-27	1	7	62	46	0.520362	60	14	1.30435	1	0	0	177.921	147.248	0	0	0	0	0	1	1			0	0	0	1	0	1.31
1102	7	2017-03-29	1	42	64.4654	142	1.60633	155	13	1.09155	0	0	0	32.5439	26.8536	0	0	0	0	0	1	0			0	0	0	2	0	1.1732
1103	5	2016-01-08	1	78	64	120	1.35747	133	13	1.10833	0	0	0	55.7643	48.1513	0	0	0	0	0	1	0			0	0	0	1	0	1.22
1104	5	2016-08-15	1	51	72	82	0.927602	95	13	1.15854	0	0	0	64.2093	67.385	0	0	0	0	0	1	0			0	0	0	2	0	1.13
1105	4	2017-03-29	1	58	64.4654	82	0.927602	95	13	1.15854	0	0	0	67.1064	70.988	0	0	0	0	0	1	0			0	0	0	2	0	1.1732
1106	4	2015-06-03	1	56	93	78	0.882353	91	13	1.16667	0	0	0	71.6671	110.245	0	0	0	0	0	1	0			0	0	0	2	0	1.1732
1107	6	2016-12-30	1	68	70	77	0.871041	90	13	1.16883	0	0	0	66.5621	57.3037	0	1	1	0	0	1	0			0	0	0	2	0	1.12
1108	3	2016-08-24	0	73	79	74	0.837104	87	13	1.17568	0	0	0	77.0577	101.938	0	0	0	0	0	1	1	3		0	0	0	2	0	0.97
1109	5	2015-12-25	1	73	97	68	0.769231	81	13	1.19118	0	0	0	79.6444	109.171	0	0	0	0	0	0	0			0	0	0	2	0	1.29
1110	4	2017-02-13	0	3	55	67	0.757919	80	13	1.19403	0	0	0	111.947	81.6822	0	0	0	0	0	1	1			1	0	0	1	0	0.85
1111	6	2015-01-28	0	62	64	59	0.667421	72	13	1.22034	0	0	0	123.999	88.6997	0	0	1	0	0	0	0			1	0	0	1	0	0.94
1112	5	2015-02-02	1	66	52	57	0.644796	70	13	1.22807	0	0	0	132.292	84.101	0	0	1	0	0	1	0			0	0	0	1	0	1.34
1113	5	2017-02-27	1	73	56	54	0.61086	67	13	1.24074	0	0	0	141.038	96.2613	0	0	0	0	0	1	0			0	0	0	1	0	1.1732
1114	6	2015-07-20	0	65	54	44	0.497738	57	13	1.29545	1	0	0	171.527	92.4237	1	0	1	0	0	1	0			0	0	1	1	0	0.89
1115	3	2015-02-25	0	24	50	180	2.0362	192	12	1.06667	0	0	0	37.5732	31.9306	0	0	1	0	0	1	0			0	0	1	1	0	1.1732
1116	6	2012-07-04	1	27	47.5	113	1.27828	125	12	1.10619	0	0	0	58.6143	34.4897	0	0	0	0	0	1	0			1	0	0	1	0	1.18
1117	5	2015-06-01	0	28	60	101	1.14253	113	12	1.11881	0	0	0	67.5881	52.0273	0	0	0	0	0	1	0		1	1	0	0	1	0	1.02
1118	5	2016-02-22	0	49	60	101	1.14253	113	12	1.11881	0	0	0	67.7363	52.5648	0	0	0	0	0	0	0			0	0	0	1	0	0.98
1119	5	2013-02-03	0	52	64.4654	98	1.1086	110	12	1.12245	0	0	0	70.0205	57.7632	0	0	1	1	0	1	0		1	1	0	0	1	0	1.1732
1120	4	2013-04-03	0	61	78	89	1.00679	101	12	1.13483	0	0	0	61.0191	79.0011	0	0	1	0	0	0	0			0	0	0	2	0	1.15
1121	4	2016-09-14	1	77	65	86	0.972851	98	12	1.13953	0	0	0	83.8805	75.064	0	1	1	0	0	1	0			1	0	0	1	0	0.3
1122	5	2016-12-30	1	76	59	83	0.938914	95	12	1.14458	0	0	0	85.209	63.7615	0	0	0	0	0	0	0			0	0	0	1	0	1.34
1123	5	2015-07-20	0	60	58	81	0.91629	93	12	1.14815	0	0	0	88.356	66.536	0	0	0	0	0	1	0			0	0	0	1	0	0.91
1124	7	2016-06-29	0	77	48	77	0.871041	89	12	1.15584	0	0	0	87.9871	40.1346	0	0	0	0	0	1	1	4		0	0	0	1	0	0.88
1125	4	2016-09-21	1	63	70	74	0.837104	86	12	1.16216	0	0	0	74.1208	80.2228	0	0	0	0	0	1	0			0	0	0	2	0	1.1
1126	4	2017-01-09	0	72	65	71	0.803167	83	12	1.16901	0	0	0	105.477	93.4632	1	0	0	0	0	0	0			0	0	0	1	0	0.88
1127	5	2015-08-03	0	63	57	71	0.803167	83	12	1.16901	0	0	0	102.7	74.0881	0	0	1	0	0	0	1	3		0	0	0	1	0	1.69
1128	5	2012-09-24	0	55	65.2	71	0.803167	83	12	1.16901	0	0	0	103.456	87.3411	0	0	0	0	0	1	0			0	0	0	1	0	1.13
1129	4	2015-05-11	1	60	68	71	0.803167	83	12	1.16901	0	0	0	77.917	81.8534	0	0	0	0	0	1	1			0	0	0	2	0	1.1732
1130	6	2013-08-12	0	7	73	70	0.791855	82	12	1.17143	0	0	0	75.4793	72.197	0	1	0	0	0	1	0		1	0	0	0	2	0	1.3
1131	4	2015-12-25	0	62	84	70	0.791855	82	12	1.17143	0	0	0	79.5664	104.18	0	0	0	0	0	0	0			0	0	0	2	0	1.44
1132	6	2015-10-10	0	77	53	69	0.780543	81	12	1.17391	0	0	0	104.196	65.049	1	0	0	0	0	1	0			1	0	0	1	0	1.24
1133	4	2014-01-23	0	56	74	69	0.780543	81	12	1.17391	0	0	0	79.9593	89.3426	1	0	0	0	0	1	0		1	0	0	1	2	0	1.46
1134	4	2014-07-14	0	6	63	69	0.780543	81	12	1.17391	0	0	0	108.879	92.8261	0	0	1	0	0	0	0			0	0	0	1	0	1.1732
1135	5	2016-10-31	0	44	76	67	0.757919	79	12	1.1791	0	0	0	82.5861	93.9254	0	0	0	0	0	1	0		1	1	0	0	2	0	1.55
1136	5	2016-08-08	1	77	84	66	0.746606	78	12	1.18182	0	0	0	83.848	104.512	0	0	0	0	0	0	0			0	0	0	2	0	1.29
1137	6	2014-03-24	1	6	56	61	0.690045	73	12	1.19672	0	0	0	119.926	77.1087	0	0	1	0	0	1	1	3		0	0	0	1	0	0.97
1138	4	2016-10-14	0	56	64.4654	59	0.667421	71	12	1.20339	0	0	0	131.909	115.201	0	0	0	0	0	0	0			0	0	0	1	0	1.21
1139	4	2015-12-25	0	73	52	57	0.644796	69	12	1.21053	0	0	0	136.673	94.8813	0	0	0	0	0	0	0			0	0	0	1	0	1.3
1140	5	2015-11-09	0	66	61	54	0.61086	66	12	1.22222	0	0	0	139.162	98.7649	0	0	1	0	0	1	0			0	0	0	1	0	0.92
1141	6	2015-10-21	1	77	48	49	0.554299	61	12	1.2449	0	0	0	153.86	80.7306	0	0	0	0	0	0	0	1		0	0	0	1	0	1.25
1142	5	2016-11-01	1	41	51	47	0.531674	59	12	1.25532	1	0	0	162.763	93.2516	0	0	1	0	0	1	1		1	1	0	0	1	0	0.69
1143	6	2015-11-18	1	74	65	43	0.486425	55	12	1.27907	1	0	0	178.442	122.889	0	0	0	0	0	0	0			0	0	0	1	0	1.17
1144	4	2016-11-09	1	52	65	42	0.475113	54	12	1.28571	1	0	0	196.017	165.119	0	0	0	0	0	0	1			0	0	0	1	0	0.95
1145	5	2016-07-20	0	46	69	140	1.58371	151	11	1.07857	0	0	0	34.4411	36.8684	0	0	0	0	0	1	0			0	0	0	2	0	1.1732
1146	5	2017-03-20	0	42	64.4654	138	1.56109	149	11	1.07971	0	0	0	35.4172	36.7545	0	0	0	0	0	1	0			1	0	0	2	0	1.1732
1147	5	2016-05-20	0	77	48	114	1.28959	125	11	1.09649	0	0	0	58.635	36.4577	0	0	0	0	0	1	0			1	0	0	1	0	0.96
1148	6	2014-10-10	1	61	58	98	1.1086	109	11	1.11224	0	0	0	68.463	46.1389	0	0	0	0	0	0	0			0	0	0	1	0	1.39
1149	4	2015-08-21	0	53	53	96	1.08597	107	11	1.11458	0	0	0	75.6036	59.1314	0	0	0	0	0	0	0			1	0	0	1	0	1.71
1150	4	2016-04-20	1	66	92	94	1.06335	105	11	1.11702	0	0	0	56.0074	81.7657	0	0	1	0	0	1	0			1	0	0	2	0	1.38
1151	4	2016-05-01	1	76	68	89	1.00679	100	11	1.1236	0	0	0	60.3752	66.579	0	0	0	0	0	1	1			0	0	0	2	0	0.8
1152	4	2015-10-09	1	67	75	75	0.848416	86	11	1.14667	0	0	0	73.5385	87.06	0	0	0	0	0	0	0			0	0	0	2	0	1.61
1153	5	2014-09-01	1	52	64.4654	73	0.825792	84	11	1.15068	0	0	0	99.5373	81.7662	0	0	0	0	0	1	0			1	0	0	1	0	1.9
1154	5	2015-11-02	0	32	64.4654	70	0.791855	81	11	1.15714	0	0	0	105.038	87.1757	1	0	0	0	0	1	1	4		0	0	0	1	0	1.1732
1155	5	2012-10-25	0	42	60	64	0.723982	75	11	1.17188	0	0	0	117.09	90.5759	1	0	0	0	0	1	0			0	0	0	1	0	1.1732
1156	6	2014-05-05	0	58	50	64	0.723982	75	11	1.17188	0	0	0	111.913	60.8055	0	0	1	0	0	0	0			0	0	0	1	0	1.13
1157	6	2016-11-23	0	71	66	64	0.723982	75	11	1.17188	0	0	0	113.611	87.201	0	0	1	0	0	0	0			1	0	0	1	0	0.74
1158	4	2013-02-06	1	46	80	63	0.71267	74	11	1.1746	0	0	0	89.0833	106.983	0	0	0	0	0	1	0			0	0	0	2	0	1.1
1159	3	2015-12-09	1	7	75	57	0.644796	68	11	1.19298	0	0	0	103.312	122.957	0	0	1	0	0	0	0			1	0	0	2	0	0.96
1160	6	2016-05-04	1	75	45	56	0.633484	67	11	1.19643	0	0	0	132.068	66.7055	0	0	1	0	0	0	0			0	0	0	1	0	1.13
1161	5	2017-03-13	1	69	53	49	0.554299	60	11	1.22449	0	0	0	156.774	97.6829	0	0	0	0	0	1	0			0	0	0	1	0	1.49
1162	4	2015-04-08	0	64	57	49	0.554299	60	11	1.22449	0	0	0	161.226	117.283	0	0	0	0	0	1	0	2		1	0	0	1	0	1.1732
1163	5	2015-12-14	1	67	75	48	0.542986	59	11	1.22917	0	0	0	119.082	119.738	0	0	0	0	0	1	0			0	0	0	2	0	1.85
1164	4	2016-11-14	0	68	54	46	0.520362	57	11	1.23913	0	0	0	176.947	126.235	0	0	0	0	0	1	0			1	0	0	1	0	1.12
1165	5	2017-02-27	0	76	51	44	0.497738	55	11	1.25	1	0	0	177.191	103.844	0	0	0	0	0	0	0			1	0	0	1	0	0.92
1166	4	2012-03-14	1	75	72.8	101	1.14253	111	10	1.09901	0	0	0	51.9776	62.0061	0	0	1	0	0	1	0			0	0	0	2	0	1.05
1167	4	2016-08-08	1	72	58	95	1.07466	105	10	1.10526	0	0	0	74.7221	60.4683	0	0	0	0	0	0	1	4		0	0	0	1	0	1.53
1168	6	2016-12-30	0	65	65	88	0.995475	98	10	1.11364	0	0	0	77.6332	58.0926	0	0	0	0	0	0	0			0	0	0	1	0	1.01
1169	3	2013-04-26	0	48	76	87	0.984163	97	10	1.11494	0	0	0	64.1964	84.3098	0	0	0	0	0	0	0			0	0	0	2	0	0.94
1170	5	2013-05-08	0	56	70	86	0.972851	96	10	1.11628	0	0	0	60.5153	61.2605	0	0	0	0	0	0	0			1	0	0	2	0	1.1732
1171	5	2015-06-05	0	62	56	85	0.961538	95	10	1.11765	0	0	0	84.292	63.3615	0	0	1	0	0	0	0			0	0	0	1	0	1.05
1172	4	2016-09-02	1	64	77	84	0.950226	94	10	1.11905	0	0	0	64.0986	78.0149	0	0	0	0	0	1	0			0	0	0	2	0	1.28
1173	2	2016-08-19	0	72	63	83	0.938914	93	10	1.12048	0	0	0	96.5009	96.6754	0	0	0	0	0	0	0			0	0	0	1	0	0.94
1174	6	2016-03-02	0	32	48	81	0.91629	91	10	1.12346	0	0	0	85.783	47.7307	0	0	1	0	0	1	0			0	0	0	1	0	1.31
1175	5	2012-10-15	0	66	62	79	0.893665	89	10	1.12658	0	0	0	90.5786	71.6898	0	0	0	0	0	1	1	3		0	0	0	1	0	1.57
1176	5	2014-12-22	0	75	120	74	0.837104	84	10	1.13514	0	0	0	72.1588	123.481	0	0	0	0	0	0	0			0	0	0	2	0	0.85
1177	2	2012-10-10	0	67	83.5	72	0.81448	82	10	1.13889	0	0	0	82.9122	121.617	0	0	1	0	0	0	0	2		1	0	0	2	0	0.67
1178	6	2015-02-06	1	48	60	66	0.746606	76	10	1.15152	0	0	0	107.021	66.7985	0	0	0	0	0	0	0			0	0	0	1	0	0.8
1179	6	2016-04-27	1	62	79	65	0.735294	75	10	1.15385	0	0	0	81.6254	80.7495	0	0	0	0	0	0	0			0	0	0	2	0	1.1732
1180	5	2012-09-19	0	68	64.4654	64	0.723982	74	10	1.15625	0	0	0	116.101	94.0812	0	1	1	0	0	1	0			1	0	0	1	0	0.83
1181	4	2016-09-05	0	71	56	60	0.678733	70	10	1.16667	0	0	0	128.466	96.2138	0	0	0	0	0	1	0			0	0	0	1	0	0.9
1182	4	2015-02-11	0	71	54	56	0.633484	66	10	1.17857	0	0	0	138.78	98.6164	0	0	0	0	0	0	0			0	0	0	1	0	1.24
1183	4	2013-04-26	0	54	59	56	0.633484	66	10	1.17857	0	0	0	141.887	115.328	0	0	0	0	0	0	0			1	0	0	1	0	1.1732
1184	5	2015-05-13	1	67	67	55	0.622172	65	10	1.18182	0	0	0	136.876	108.818	0	0	0	0	0	1	0			0	0	0	1	0	0.92
1185	4	2012-10-25	0	63	52	50	0.565611	60	10	1.2	0	0	0	157.053	103.788	0	0	0	0	0	0	0	2		0	0	0	1	0	1.29
1186	6	2017-02-13	0	45	60	86	0.972851	95	9	1.10465	0	0	0	79.4607	53.8173	0	0	0	0	0	1	0			0	1	0	1	0	1.39
1187	5	2017-02-22	0	43	70	161	1.82127	170	9	1.0559	0	0	0	29.9952	35.8545	0	0	1	0	0	1	0			0	0	0	2	0	1.1732
1188	6	2015-07-22	1	46	70	137	1.54977	146	9	1.06569	0	0	0	34.9876	36.5227	1	0	1	0	0	1	0			0	0	0	2	0	1.1732
1189	5	2015-03-09	1	55	67	133	1.50452	142	9	1.06767	0	0	0	49.1178	43.7833	1	0	0	0	0	1	0			0	0	0	1	0	1.1732
1190	4	2015-06-19	1	31	62	111	1.25566	120	9	1.08108	0	0	0	62.8874	56.738	1	0	0	0	0	1	1	4		1	0	1	1	0	1.07
1191	4	2016-04-27	0	63	83	102	1.15385	111	9	1.08824	0	0	0	52.3977	74.4609	0	0	0	0	0	1	1	4		0	0	0	2	0	1.29
1192	5	2012-07-02	0	66	58	98	1.1086	107	9	1.09184	0	0	0	70.1924	52.5672	0	1	0	0	0	1	0		1	0	0	0	1	0	0.96
1193	3	2016-03-14	0	62	74	90	1.0181	99	9	1.1	0	0	0	61.7348	79.3595	0	0	0	0	0	1	0			1	0	0	2	0	1.49
1194	6	2013-03-12	0	65	64	85	0.961538	94	9	1.10588	0	0	0	81.1731	60.7778	0	0	0	0	0	0	0			0	0	0	1	0	0.97
1195	5	2016-03-09	0	59	64.4654	81	0.91629	90	9	1.11111	0	0	0	87.2506	69.9319	0	0	0	0	0	0	0			0	0	0	1	0	0.88
1196	4	2015-04-29	1	67	64.4654	80	0.904977	89	9	1.1125	0	0	0	91.6943	81.624	0	1	1	0	0	1	0			0	0	0	1	0	0.62
1197	4	2017-02-10	0	69	97	79	0.893665	88	9	1.11392	0	0	0	70.2482	111.79	0	0	0	0	0	0	0			0	0	0	2	0	0.97
1198	4	2012-01-04	0	45	95	79	0.893665	88	9	1.11392	0	0	0	70.6557	111.346	0	0	0	0	0	1	0			1	0	0	2	0	1.1732
1199	6	2012-11-19	0	69	64.4654	77	0.871041	86	9	1.11688	0	0	0	91.4341	69.4249	0	0	0	0	0	0	0		1	0	0	0	1	0	1.1732
1200	5	2014-07-07	0	64	56	77	0.871041	86	9	1.11688	0	0	0	92.0929	62.5564	0	0	0	0	0	0	0			0	0	0	1	0	0.83
1201	5	2016-04-07	1	63	61	77	0.871041	86	9	1.11688	0	0	0	93.7891	73.9911	0	0	0	0	0	1	0		1	0	0	0	1	0	1.42
1202	4	2016-10-14	1	63	65	77	0.871041	86	9	1.11688	0	0	0	97.0753	89.1817	0	0	0	0	0	0	0			0	0	0	1	0	1.08
1203	5	2016-06-17	1	74	72	76	0.859729	85	9	1.11842	0	0	0	69.8202	71.4263	0	0	0	0	0	1	1	4		0	0	0	2	0	0.95
1204	6	2016-12-12	1	64	45	73	0.825792	82	9	1.12329	0	0	0	96.7747	49.8069	0	0	1	0	0	1	0			1	0	0	1	0	1.45
1205	5	2016-02-22	0	32	74	73	0.825792	82	9	1.12329	0	0	0	73.7509	79.2967	0	0	0	0	0	0	0			0	0	0	2	0	1.05
1206	5	2014-05-28	0	45	39	71	0.803167	80	9	1.12676	0	0	0	101.945	49.0751	0	0	0	0	0	0	0			0	0	0	1	0	1.06
1207	6	2015-04-10	1	55	65	68	0.769231	77	9	1.13235	0	0	0	103.473	70.5774	0	0	1	0	0	0	0			0	0	0	1	0	0.98
1208	6	2015-04-03	1	50	78	68	0.769231	77	9	1.13235	0	0	0	78.1522	79.9947	0	0	0	0	0	0	0	2		0	0	0	2	0	1.19
1209	5	2014-06-18	0	75	46	65	0.735294	74	9	1.13846	0	0	0	113.031	63.6098	1	0	0	0	0	0	0			0	0	0	1	0	0.82
1210	2	2016-07-25	0	77	78	63	0.71267	72	9	1.14286	0	0	0	99.5748	136.639	0	1	1	0	0	1	0			0	0	0	2	0	0.88
1211	5	2012-09-11	0	51	91	62	0.701357	71	9	1.14516	0	0	0	88.3368	110.802	0	0	0	0	0	1	0			0	0	0	2	0	1.29
1212	3	2015-11-02	0	64	72	60	0.678733	69	9	1.15	0	0	0	99.705	119.088	0	0	1	0	0	1	0			0	0	0	2	0	1.1732
1213	5	2014-04-02	0	58	65	56	0.633484	65	9	1.16071	0	0	0	133.579	101.975	0	0	0	0	0	0	0			0	0	0	1	0	1.52
1214	6	2013-06-13	0	66	51	54	0.61086	63	9	1.16667	0	0	0	136.596	74.9144	0	0	0	0	0	0	0			0	0	0	1	0	0.95
1215	4	2015-02-16	1	69	55	51	0.576923	60	9	1.17647	0	0	0	153.259	107.007	0	0	1	0	0	1	0		2	1	0	0	1	0	0.81
1216	6	2015-06-10	1	66	75	49	0.554299	58	9	1.18367	0	0	0	114.611	109.439	0	0	1	0	0	1	0			0	0	0	2	0	1.1732
1217	5	2016-12-23	1	63	54	41	0.463801	50	9	1.21951	0	0	0	195.982	127.829	0	0	1	0	0	1	0	2		0	0	0	1	0	0.85
1218	5	2017-02-10	0	42	64.4654	134	1.51584	142	8	1.0597	0	0	0	49.5544	45.1884	0	1	1	0	0	1	1	4		0	0	0	1	0	0.97
1219	5	2016-07-25	1	63	80	124	1.40271	132	8	1.06452	0	0	0	39.7635	49.0806	0	0	0	0	0	1	0			0	0	0	2	0	0.93
1220	4	2016-04-06	0	57	70	106	1.1991	114	8	1.07547	0	0	0	49.958	59.8395	0	0	1	0	0	0	0			0	0	0	2	0	1.45
1221	3	2011-07-08	1	39	64.4654	103	1.16516	111	8	1.07767	0	0	0	73.1475	75.6039	0	0	0	0	0	1	1	3		1	0	0	1	0	0.9
1222	6	2014-12-03	0	69	56	101	1.14253	109	8	1.07921	0	0	0	67.099	46.856	0	0	0	0	0	1	0			0	0	1	1	0	0.77
1223	4	2016-04-27	0	27	63	98	1.1086	106	8	1.08163	0	0	0	72.3227	64.4122	0	0	1	0	0	1	1			0	0	0	1	0	0.65
1224	4	2017-02-10	0	32	61	94	1.06335	102	8	1.08511	0	0	0	76.9923	68.2236	0	0	1	0	0	1	0			0	0	0	1	0	1.1
1225	6	2013-04-10	0	55	64.4654	92	1.04072	100	8	1.08696	0	0	0	73.4841	53.9313	0	0	1	0	0	1	0			0	0	0	1	0	1.44
1226	5	2012-06-06	0	81	64.4654	92	1.04072	100	8	1.08696	0	0	0	75.4374	61.9947	0	0	1	0	0	0	1	2		1	0	0	1	0	1.32
1227	7	2016-03-07	0	48	60	91	1.02941	99	8	1.08791	0	0	0	73.2898	45.8612	0	0	0	0	0	1	0			0	0	0	1	0	0.68
1228	5	2015-04-15	0	73	73	90	1.0181	98	8	1.08889	0	0	0	57.6248	62.0346	0	0	1	0	0	0	0		3	0	0	0	2	0	0.93
1229	4	2011-05-03	1	46	70	87	0.984163	95	8	1.09195	0	0	0	61.1312	66.7793	0	0	1	0	0	0	0			1	0	0	2	0	1.28
1230	5	2016-10-21	0	50	67	86	0.972851	94	8	1.09302	0	0	0	81.0886	67.114	0	0	1	0	0	1	0			0	0	0	1	0	1.1732
1231	6	2016-07-04	0	53	61	82	0.927602	90	8	1.09756	0	0	0	84.8798	61.1042	0	0	0	0	0	1	0			1	0	0	1	0	0.84
1232	3	2017-02-10	0	68	66	79	0.893665	87	8	1.10127	0	0	0	96.2576	93.7328	1	0	1	0	0	0	0			1	0	0	1	0	0.73
1233	5	2015-11-13	0	65	71	78	0.882353	86	8	1.10256	0	0	0	67.9762	69.6381	0	0	0	0	0	0	0			0	0	0	2	0	1.64
1234	5	2014-06-09	0	6	50	74	0.837104	82	8	1.10811	0	0	0	97.3243	60.7411	0	0	0	0	0	1	0	2		1	0	0	1	0	1.52
1235	4	2015-01-21	0	64	64.4654	70	0.791855	78	8	1.11429	0	0	0	106.832	92.8663	0	1	1	0	0	0	0			0	0	0	1	0	1.48
1236	3	2011-05-05	1	75	81	70	0.791855	78	8	1.11429	0	0	0	83.44	114.782	0	0	0	0	0	0	0	2		0	0	0	2	0	1.15
1237	5	2014-06-16	1	6	62	69	0.780543	77	8	1.11594	0	0	0	105.109	79.3896	0	0	0	0	0	1	0			0	0	0	1	0	1.26
1238	5	2015-05-04	0	43	63	62	0.701357	70	8	1.12903	0	0	0	120.989	96.696	0	0	0	0	0	0	0		2	0	0	0	1	0	1.08
1239	5	2013-08-07	0	6	63	60	0.678733	68	8	1.13333	0	0	0	124.098	94.8156	1	0	0	0	0	1	0			1	0	0	1	0	1.25
1240	4	2014-02-24	1	63	79	60	0.678733	68	8	1.13333	0	0	0	97.1193	122.139	0	0	1	0	0	0	0			0	0	0	2	0	0.74
1241	4	2015-04-27	1	74	57	58	0.656109	66	8	1.13793	0	0	0	132.226	97.7982	0	0	0	0	0	0	0	2		0	0	0	1	0	1.13
1242	6	2016-04-18	0	59	50	53	0.599548	61	8	1.15094	0	0	0	140.92	78.8647	0	0	0	0	0	0	0			0	0	0	1	0	1.11
1243	5	2016-07-22	0	63	70	48	0.542986	56	8	1.16667	0	0	0	119.789	114.67	0	0	0	0	0	0	1	4		0	0	0	2	0	1.11
1244	4	2014-11-05	1	72	64.4654	48	0.542986	56	8	1.16667	0	0	0	163.972	132.105	0	0	1	0	0	1	0			0	0	0	1	0	1.1732
1245	4	2015-06-01	0	72	74	45	0.50905	53	8	1.17778	0	0	0	131.229	138.083	0	0	1	0	0	0	0			0	0	0	2	0	1
1246	5	2015-12-21	0	77	61	29	0.328054	37	8	1.27586	1	0	0	290.51	199.438	1	0	0	0	0	1	0			0	0	0	1	0	1.06
1247	5	2015-05-11	1	39	78	173	1.95701	180	7	1.04046	0	0	0	27.2057	35.0332	0	0	1	0	0	1	0			0	0	0	2	0	0.8
1248	4	2015-03-09	0	57	63	163	1.84389	170	7	1.04294	0	0	0	40.1955	38.6926	0	0	0	0	0	1	1	4		0	0	0	1	0	0.54
1249	5	2015-06-24	1	65	90	126	1.42534	133	7	1.05556	0	0	0	39.3841	56.4796	0	0	0	0	0	1	0		1	0	0	0	2	0	1.07
1250	6	2012-09-24	1	6	51	117	1.32353	124	7	1.05983	0	0	0	56.2644	35.6155	1	0	0	0	0	0	0		1	1	0	1	1	0	0.93
1251	6	2017-02-22	0	57	60	113	1.27828	120	7	1.06195	0	0	0	58.4429	42.8729	0	0	0	0	0	1	0			0	0	0	1	0	1.32
1252	3	2015-07-22	1	58	65	110	1.24434	117	7	1.06364	0	0	0	67.8635	71.5129	0	0	0	0	0	1	0			1	0	0	1	0	1.1732
1253	6	2015-06-01	0	53	64	107	1.21041	114	7	1.06542	0	0	0	61.3394	44.2333	1	0		0	0	0	0	2		1	0	0	1	0	1.1732
1254	6	2016-08-22	0	32	55	103	1.16516	110	7	1.06796	0	0	0	64.3397	40.4556	0	0	0	0	0	0	0			0	0	0	1	0	1.6
1255	7	2016-01-11	0	61	64.4654	102	1.15385	109	7	1.06863	0	0	0	63.6413	40.8714	0	0	0	0	0	0	1	3		0	0	0	1	0	0.64
1256	7	2014-09-26	1	62	77	94	1.06335	101	7	1.07447	0	0	0	52.3229	48.0251	0	0	0	0	0	1	0			1	0	0	2	0	1.2
1257	5	2016-02-02	0	33	56	90	1.0181	97	7	1.07778	0	0	0	78.5126	58.6505	1	0	1	0	0	1	1			0	0	0	1	0	1.68
1258	5	2014-12-29	0	59	62	88	0.995475	95	7	1.07955	0	0	0	80.487	66.114	0	1	0	0	0	0	0		2	1	0	0	1	0	1.03
1259	4	2016-06-24	0	64	58	88	0.995475	95	7	1.07955	0	0	0	82.246	67.0453	0	0	0	0	0	0	0			0	0	0	1	0	0.88
1260	3	2016-09-14	0	67	69	88	0.995475	95	7	1.07955	0	0	0	63.5295	76.197	0	0	0	0	0	1	1	4		1	0	0	2	0	1.1732
1261	6	2013-04-09	1	58	64.4654	84	0.950226	91	7	1.08333	0	0	0	82.4436	62.5914	0	0	1	0	0	1	0			1	0	0	1	0	1.57
1262	4	2016-05-01	1	76	58	84	0.950226	91	7	1.08333	0	0	0	87.2679	71.5525	0	0	0	0	0	0	0			0	0	0	1	0	0.73
1263	5	2016-07-11	0	62	67	81	0.91629	88	7	1.08642	0	0	0	87.206	72.5061	1	0	1	0	0	0	0			0	0	0	1	0	1.1732
1264	5	2016-10-24	1	44	64.4654	80	0.904977	87	7	1.0875	0	0	0	88.2579	69.8465	0	0	0	0	0	1	0			0	0	0	1	0	1.03
1265	5	2015-07-17	1	77	58	80	0.904977	87	7	1.0875	0	0	0	90.5684	70.2259	0	0	0	0	0	1	0			0	0	0	1	0	1.1732
1266	3	2015-04-27	0	69	70	80	0.904977	87	7	1.0875	0	0	0	70.0941	82.5021	0	0	1	0	0	1	0			0	0	0	2	0	0.95
1267	5	2014-10-27	0	61	62	77	0.871041	84	7	1.09091	0	0	0	92.4013	70.3883	1	0	0	0	0	0	0			1	0	0	1	0	1.13
1268	6	2013-06-28	0	7	58	77	0.871041	84	7	1.09091	0	0	0	90.6742	59.6496	0	0	0	0	0	0	0			0	0	0	1	0	1.1732
1269	6	2013-04-10	0	52	64.4654	75	0.848416	82	7	1.09333	0	0	0	93.045	66.2569	0	1	1	0	0	1	0		1	0	0	0	1	0	1.27
1270	5	2011-10-22	1	63	75	74	0.837104	81	7	1.09459	0	0	0	71.4405	73.5937	0	0	1	0	0	0	0			0	0	0	2	0	2.3
1271	4	2016-03-02	0	47	69	74	0.837104	81	7	1.09459	0	0	0	74.1842	79.3167	0	0	0	0	0	1	0			0	0	0	2	0	1.6
1272	5	2015-09-21	0	47	69	72	0.81448	79	7	1.09722	0	0	0	75.726	78.2483	0	0	0	0	0	1	0			1	0	0	2	0	1.23
1273	5	2013-03-27	0	67	51	71	0.803167	78	7	1.09859	0	0	0	103.533	68.5219	0	0	0	0	0	1	0			0	0	1	1	0	0.74
1274	4	2016-11-14	1	71	62	71	0.803167	78	7	1.09859	0	0	0	105.013	87.8101	0	0	0	0	0	1	0	2		0	0	0	1	0	0.7
1275	5	2016-11-07	1	75	66	69	0.780543	76	7	1.10145	0	0	0	105.46	85.8146	0	0	0	0	0	1	0			0	0	0	1	0	1.1732
1276	5	2016-01-04	0	71	55	69	0.780543	76	7	1.10145	0	0	0	106.928	75.8236	0	0	1	0	0	1	1		2	1	0	0	1	0	0.85
1277	4	2013-04-10	1	74	64	68	0.769231	75	7	1.10294	0	0	0	111.487	97.8708	1	0	0	0	0	0	0			0	0	0	1	0	1.1732
1278	4	2014-04-18	1	59	49	68	0.769231	75	7	1.10294	0	0	0	113.106	78.287	0	0	0	0	0	0	0			0	0	0	1	0	1.33
1279	6	2016-05-18	1	51	49	66	0.746606	73	7	1.10606	0	0	0	108.271	58.6153	0	0	0	0	0	1	0			0	0	0	1	0	1.1732
1280	6	2017-02-27	0	74	59	64	0.723982	71	7	1.10938	0	0	0	113.413	77.2547	0	0	1	0	0	1	0	2		0	0	0	1	0	1.37
1281	5	2015-01-19	1	51	70	64	0.723982	71	7	1.10938	0	0	0	84.9414	81.5902	0	0	1	0	0	0	0			0	0	0	2	0	1.22
1282	4	2014-10-20	0	62	52	64	0.723982	71	7	1.10938	0	0	0	117.865	80.456	0	1	0	0	0	0	0		1	0	0	0	1	0	1.1732
1283	5	2015-01-04	0	57	73	62	0.701357	69	7	1.1129	0	0	0	88.6634	90.3835	0	0	1	0	0	1	0			0	0	0	2	0	1.35
1284	5	2015-02-09	0	49	61	60	0.678733	67	7	1.11667	0	0	0	123.109	88.4712	0	0	0	0	0	1	0			0	0	0	1	0	1.1732
1285	5	2016-05-23	0	65	52	60	0.678733	67	7	1.11667	0	0	0	125.841	82.957	0	0	1	0	0	1	0			1	0	0	1	0	1.64
1286	3	2015-08-26	0	74	70	60	0.678733	67	7	1.11667	0	0	0	100.732	118.472	0	0	0	0	0	1	0			1	0	0	2	0	1.52
1287	5	2015-08-26	1	68	62	57	0.644796	64	7	1.12281	0	0	0	132.965	102.415	0	0	0	0	0	1	0		1	1	0	1	1	0	0.85
1288	4	2015-11-18	0	7	58	56	0.633484	63	7	1.125	0	0	0	137.884	103.584	1	1	1	0	0	1	0			0	0	0	1	0	0.91
1289	6	2015-07-31	0	48	55	56	0.633484	63	7	1.125	0	0	0	132.537	83.042	0	0	0	0	0	1	0			1	0	0	1	0	0.7
1290	6	2016-02-01	1	6	50	53	0.599548	60	7	1.13208	0	0	0	140.439	77.4493	0	0	0	0	0	1	0			0	0	0	1	0	1.07
1291	5	2014-03-03	1	37	68	50	0.565611	57	7	1.14	0	0	0	113.711	104.667	0	0	0	0	0	1	0			0	0	0	2	0	1.1732
1292	5	2015-01-14	0	69	52	50	0.565611	57	7	1.14	0	0	0	155.494	100.01	0	0	1	0	0	0	0			0	0	0	1	0	1.42
1293	3	2016-06-24	1	63	60	49	0.554299	56	7	1.14286	0	0	0	169.138	141.748	0	0	1	0	0	0	0		1	1	0	0	1	0	1.03
1294	5	2015-02-06	1	64	61	47	0.531674	54	7	1.14894	0	0	0	166.818	124.271	0	0	0	0	0	0	0			0	0	0	1	0	1.1732
1295	4	2016-11-25	1	69	58	46	0.520362	53	7	1.15217	0	0	0	172.563	124.91	0	0	0	0	0	1	0		1	0	0	0	1	0	0.91
1296	3	2015-03-16	1	61	63	39	0.441176	46	7	1.17949	0	0	0	216.325	178.913	0	0	0	0	0	0	0			0	0	0	1	0	0.77
1297	5	2013-06-08	1	69	56	149	1.68552	155	6	1.04027	0	0	0	43.9401	35.6186	0	0	0	0	0	0	0			0	0	0	1	0	1.61
1298	5	2012-11-28	1	69	67	137	1.54977	143	6	1.0438	0	0	0	48.7629	47.6705	0	1	0	0	0	0	0			0	0	0	1	0	1.1732
1299	4	2016-11-02	1	45	88	120	1.35747	126	6	1.05	0	0	0	42.6601	63.3806	0	0	1	0	0	1	0			0	0	0	2	0	1.21
1300	2	2010-03-02	0	63	64.4654	119	1.34615	125	6	1.05042	0	0	0	62.4882	66.6559	0	1	1	0	0	1	0		4	0	0	0	1	0	1.1732
1301	5	2015-01-16	0	64	82	98	1.1086	104	6	1.06122	0	0	0	51.9186	62.2454	0	0	1	0	0	1	0			0	0	0	2	0	0.95
1302	5	2016-02-24	0	64	72	93	1.05204	99	6	1.06452	0	0	0	55.5277	59.4147	0	0	1	0	0	0	0			0	0	0	2	0	1.1732
1303	5	2015-03-27	1	77	64.4654	93	1.05204	99	6	1.06452	0	0	0	74.968	63.0769	0	0	1	0	0	1	0	1		0	0	0	1	0	0.82
1304	3	2017-03-13	0	57	64.4654	92	1.04072	98	6	1.06522	0	0	0	60.6705	68.9698	0	0	1	0	0	0	0			0	0	0	2	0	1.06
1305	3	2016-11-02	0	35	62	90	1.0181	96	6	1.06667	0	0	0	84.6236	81.445	0	0	0	0	0	1	0			1	0	0	1	0	1.12
1306	5	2014-09-22	0	62	90	89	1.00679	95	6	1.06742	0	0	0	58.1147	75.7877	0	0	1	0	0	0	0			0	0	0	2	0	1.13
1307	4	2015-09-02	0	65	67	89	1.00679	95	6	1.06742	0	0	0	60.9522	67.6318	0	0	0	0	0	1	0			0	0	0	2	0	1.1732
1308	5	2015-01-28	0	68	63	86	0.972851	92	6	1.06977	0	0	0	82.6777	68.8339	0	0	1	0	0	1	0		2	1	0	0	1	0	0.9
1309	2	2014-12-17	0	53	91	86	0.972851	92	6	1.06977	0	0	0	68.728	114.552	0	0	1	0	0	0	0			0	0	0	2	0	1.19
1310	3	2015-12-28	1	6	83	85	0.961538	91	6	1.07059	0	0	0	67.1853	98.4966	0	0	0	0	0	1	1	3		0	0	0	2	0	1.32
1311	5	2016-05-01	1	3	61	82	0.927602	88	6	1.07317	0	0	0	87.6686	70.9333	0	0	0	0	0	1	1	3		0	0	0	1	0	0.76
1312	5	2015-04-10	0	60	59	79	0.893665	85	6	1.07595	0	0	0	91.2441	70.3513	0	0	0	0	0	0	0			0	0	0	1	0	1.65
1313	4	2016-11-07	0	65	74	76	0.859729	82	6	1.07895	0	0	0	71.4979	81.0106	0	0	1	0	0	1	0			0	0	0	2	0	1.54
1314	6	2016-09-12	0	66	55	75	0.848416	81	6	1.08	0	0	0	93.5061	58.2009	0	0	0	0	0	0	0			1	0	0	1	0	0.78
1315	4	2016-03-01	0	63	72	75	0.848416	81	6	1.08	0	0	0	74.3201	86.4542	0	0	0	0	0	0	0			0	0	0	2	0	1.1732
1316	3	2015-04-27	0	43	60	74	0.837104	80	6	1.08108	0	0	0	106.491	96.6994	0	0	1	0	0	0	0			0	0	0	1	0	0.93
1317	5	2013-07-19	0	44	59	73	0.825792	79	6	1.08219	0	0	0	100.612	78.1372	0	0	0	0	0	0	0			0	0	0	1	0	0.99
1318	4	2016-07-20	0	67	71	73	0.825792	79	6	1.08219	0	0	0	77.2146	89.4413	0	0	1	0	0	0	0			1	0	0	2	0	1.09
1319	3	2012-10-08	1	59	69.1	73	0.825792	79	6	1.08219	0	0	0	77.7407	88.7339	0	0	0	0	0	1	1	4		0	0	0	2	0	1.96
1320	4	2016-07-29	0	62	75	71	0.803167	77	6	1.08451	0	0	0	79.2227	95.3143	0	0	0	0	0	1	0			1	0	0	2	0	1.04
1321	4	2012-08-01	1	71	69	70	0.791855	76	6	1.08571	0	0	0	80.426	88.5896	0	0	0	0	0	0	0	2		0	0	0	2	0	1.1732
1322	5	2015-08-26	0	61	74	69	0.780543	75	6	1.08696	0	0	0	79.5345	87.5518	0	0	1	0	0	1	0			0	0	1	2	0	0.91
1323	4	2015-08-26	0	71	78	69	0.780543	75	6	1.08696	0	0	0	82.1777	103.125	0	0	1	0	0	0	0	2		0	0	0	2	0	1.44
1324	4	2014-02-19	1	57	63	66	0.746606	72	6	1.09091	0	0	0	117.201	104.036	0	0	0	0	0	1	0	2		0	0	0	1	0	1.13
1325	5	2016-02-24	1	60	57	65	0.735294	71	6	1.09231	0	0	0	112.476	77.0569	0	0	0	0	0	0	0			0	0	0	1	0	1.19
1326	5	2015-06-12	1	48	64.4654	64	0.723982	70	6	1.09375	0	0	0	116.105	94.0947	0	0	1	0	0	0	0			0	0	0	1	0	0.72
1327	5	2014-01-02	0	62	55	58	0.656109	64	6	1.10345	0	0	0	128.08	82.7048	0	0	0	0	0	1	0			1	0	0	1	0	1.07
1328	3	2012-12-26	0	5	64.4654	58	0.656109	64	6	1.10345	0	0	0	140.8	132.019	0	0	0	0	0	0	1	3		1	0	0	1	0	1.1732
1329	4	2015-02-02	0	61	52	57	0.644796	63	6	1.10526	0	0	0	134.724	90.3427	0	0	0	0	0	1	1			0	0	0	1	0	1.53
1330	3	2016-03-21	0	64	80	55	0.622172	61	6	1.10909	0	0	0	108.734	139.583	0	0	0	0	0	1	0			1	0	0	2	0	0.96
1331	5	2012-03-30	1	38	57	54	0.61086	60	6	1.11111	0	0	0	140.985	97.824	0	0	0	0	0	0	0			0	0	0	1	0	1.1732
1332	7	2016-09-28	0	45	61	53	0.599548	59	6	1.11321	0	0	0	137.039	81.2282	0	0	0	1	0	1	0		1	1	0	0	1	0	0.91
1333	4	2014-07-21	0	64	60	51	0.576923	57	6	1.11765	0	0	0	156.729	125.663	0	0	0	0	0	0	0			0	0	0	1	0	1.13
1334	4	2016-03-25	1	62	80	50	0.565611	56	6	1.12	0	0	0	120.132	149.365	0	0	0	0	0	1	0			0	0	0	2	0	1.03
1335	4	2017-01-16	0	67	59	46	0.520362	52	6	1.13043	0	0	0	177.27	138.661	0	0	0	0	0	1	0			0	0	1	1	0	1.1732
1336	5	2014-09-04	1	63	64.4654	44	0.497738	50	6	1.13636	0	0	0	176.228	127.979	0	0	0	0	0	0	0			0	0	0	1	0	1.1732
1337	6	2016-06-27	1	65	61	119	1.34615	124	5	1.04202	0	0	0	55.6256	43.7004	0	0	0	0	0	0	1			0	0	0	1	0	0.84
1338	5	2016-05-30	0	78	64	115	1.3009	120	5	1.04348	0	0	0	58.4178	49.6533	0	0	1	0	0	1	0		1	0	0	0	1	0	1.25
1339	5	2016-05-04	0	67	49	96	1.08597	101	5	1.05208	0	0	0	72.1104	45.9913	0	0	1	0	0	1	0			0	0	0	1	0	1.81
1340	5	2015-09-11	0	64	176	95	1.07466	100	5	1.05263	0	0	0	53.9344	139.26	0	0	0	0	0	1	0			0	0	0	2	0	1.24
1341	6	2017-01-18	0	63	70	93	1.05204	98	5	1.05376	0	0	0	54.0066	50.1093	0	0	1	0	0	1	0			0	0	0	2	0	2.07
1342	3	2015-04-15	1	71	75	90	1.0181	95	5	1.05556	0	0	0	61.9576	81.1586	0	0	0	0	0	0	0			0	0	0	2	0	1.35
1343	4	2017-02-03	1	64	64.4654	89	1.00679	94	5	1.05618	0	0	0	81.7895	75.5189	0	0	0	0	0	0	0			0	0	1	1	0	0.97
1344	6	2014-06-30	0	35	52	88	0.995475	93	5	1.05682	0	0	0	77.1001	44.5719	0	0	1	0	0	1	0		1	1	0	0	1	0	1.03
1345	5	2015-09-23	0	66	69	88	0.995475	93	5	1.05682	0	0	0	60.2347	64.6894	0	0	1	0	0	1	0			0	0	0	2	0	1.22
1346	3	2016-08-22	0	69	72	87	0.984163	92	5	1.05747	0	0	0	63.5915	77.9132	0	0	0	0	0	1	0			0	0	0	2	0	1.25
1347	7	2015-08-17	1	62	64	85	0.961538	90	5	1.05882	0	0	0	79.1151	51.5207	1	0	1	0	0	0	0			0	0	0	1	0	0.9
1348	4	2014-02-07	1	59	67	85	0.961538	90	5	1.05882	0	0	0	87.7295	86.4743	0	0	0	0	0	1	0			0	0	0	1	0	1.1732
1349	5	2015-04-22	0	63	73	82	0.927602	87	5	1.06098	0	0	0	64.8717	71.3652	0	0	1	0	0	0	0			1	0	0	2	0	1.1
1350	4	2016-09-28	1	54	78	78	0.882353	83	5	1.0641	0	0	0	71.1036	90.3367	0	0	1	0	0	1	1			0	0	0	2	0	0.95
1351	6	2016-05-06	1	50	64.4654	76	0.859729	81	5	1.06579	0	0	0	92.6221	69.5252	0	0	0	0	0	1	1	3		0	0	0	1	0	0.9
1352	5	2016-05-04	0	72	59	76	0.859729	81	5	1.06579	0	0	0	93.8863	68.1406	0	0	0	0	0	1	1			0	0	0	1	0	1.27
1353	3	2015-04-24	1	64	80	76	0.859729	81	5	1.06579	0	0	0	75.9853	104.734	0	0	0	0	0	1	0			0	0	0	2	0	1.34
1354	4	2015-05-22	0	66	60	74	0.837104	79	5	1.06757	0	0	0	100.095	81.4752	0	0	1	0	0	0	0		1	1	0	1	1	0	0.72
1355	4	2013-04-22	1	49	60	73	0.825792	78	5	1.06849	0	0	0	100.979	80.5592	0	0	1	0	0	0	0		1	1	0	0	1	0	1.1732
1356	3	2014-05-05	0	7	54	73	0.825792	78	5	1.06849	0	0	0	106.418	84.9496	0	1	0	0	0	1	0			0	0	0	1	0	1.1732
1357	5	2016-12-23	0	61	68	72	0.81448	77	5	1.06944	0	0	0	75.1514	74.7866	1	1	1	0	1	0	0			0	0	0	2	0	1.22
1358	5	2016-04-25	1	69	67	72	0.81448	77	5	1.06944	0	0	0	73.912	68.3708	0	0	0	0	0	0	0		1	0	0	0	2	0	1.1732
1359	3	2014-11-12	0	73	64.4654	72	0.81448	77	5	1.06944	0	0	0	109.818	106.583	0	0	0	0	0	0	0			0	0	0	1	0	1.07
1360	5	2014-07-09	0	65	62	70	0.791855	75	5	1.07143	0	0	0	104.95	83.5587	0	0	0	0	0	1	0			0	0	0	1	0	1.1732
1361	5	2016-02-26	0	67	66	70	0.791855	75	5	1.07143	0	0	0	105.276	90.0564	0	0	0	0	0	0	0			0	0	0	1	0	0.83
1362	4	2014-02-10	0	39	74	68	0.769231	73	5	1.07353	0	0	0	83.5535	99.2037	0	0	1	0	0	0	0			0	0	0	2	0	1.22
1363	5	2015-01-28	1	59	77	67	0.757919	72	5	1.07463	0	0	0	80.4797	85.287	0	0	1	0	0	1	0			0	0	0	2	0	1.08
1364	5	2016-07-20	1	46	64.4654	67	0.757919	72	5	1.07463	0	0	0	108.528	84.2435	0	0	0	0	0	1	0			0	0	0	1	0	1.09
1365	4	2015-06-16	0	62	64.4654	67	0.757919	72	5	1.07463	0	0	0	113.474	100.238	0	1	0	0	0	0	1	4		0	0	0	1	0	0.75
1366	4	2014-05-07	1	39	64.4654	66	0.746606	71	5	1.07576	0	0	0	116.701	105.148	1	0	0	0	0	0	0			1	0	0	1	0	1.43
1367	3	2016-04-22	1	71	53	66	0.746606	71	5	1.07576	0	0	0	117.576	88.3108	0	0	0	0	0	0	0			1	0	0	1	0	1.29
1368	5	2016-09-30	1	62	72	65	0.735294	70	5	1.07692	0	0	0	83.1755	81.4046	0	0	1	0	0	0	0			1	0	0	2	0	1.47
1369	5	2016-11-21	0	68	55	65	0.735294	70	5	1.07692	0	0	0	113.28	76.8038	0	0	1	0	0	0	0			0	0	0	1	0	1.1732
1370	5	2014-03-03	0	68	64.4654	65	0.735294	70	5	1.07692	0	0	0	114.581	94.4219	0	0	0	0	0	0	0		1	1	0	0	1	0	0.94
1371	4	2015-01-19	0	60	75	65	0.735294	70	5	1.07692	0	0	0	88.1416	105.617	0	0	1	0	0	1	1	4		0	0	0	2	0	1.09
1372	5	2015-12-14	1	57	60	64	0.723982	69	5	1.07812	0	0	0	116.724	89.4785	0	0	0	0	0	0	0			0	0	0	1	0	0.6
1373	5	2014-11-05	0	62	63	63	0.71267	68	5	1.07937	0	0	0	118.517	94.3337	0	0	0	0	0	1	0			0	0	0	1	0	1.02
1374	4	2017-02-10	0	61	79	62	0.701357	67	5	1.08065	0	0	0	90.6214	106.825	0	0	0	0	0	0	0			0	0	0	2	0	1.35
1375	4	2015-07-24	0	78	58	59	0.667421	64	5	1.08475	0	0	0	133.665	107.767	0	0	0	0	0	0	0			0	0	0	1	0	1.43
1376	4	2016-01-22	0	74	68	58	0.656109	63	5	1.08621	0	0	0	99.7323	104.762	0	0	0	0	0	0	0		1	1	0	0	2	0	1.32
1377	5	2013-04-15	0	51	92	57	0.644796	62	5	1.08772	0	0	0	97.468	122.594	0	0	0	0	0	1	1			0	0	0	2	0	1.39
1378	4	2015-11-09	0	72	65	57	0.644796	62	5	1.08772	0	0	0	138.58	123.711	0	0	0	0	0	0	0		1	0	0	0	1	0	1.54
1379	3	2015-11-03	1	62	61	56	0.633484	61	5	1.08929	0	0	0	144.391	124.851	0	0	0	0	0	1	0			0	0	0	1	0	1.18
1380	5	2015-10-27	1	73	58	52	0.588235	57	5	1.09615	0	0	0	147.047	102.735	0	0	0	0	0	0	0		1	0	0	0	1	0	0.92
1381	3	2014-11-24	0	5	79	51	0.576923	56	5	1.09804	0	0	0	120.104	153.22	0	0	0	0	0	1	0			0	0	0	2	0	1.08
1382	7	2014-10-10	0	61	46	50	0.565611	55	5	1.1	0	0	0	147.168	66.7768	0	0	0	0	0	0	0			0	0	0	1	0	2.22
1383	4	2013-05-03	1	73	61	47	0.531674	52	5	1.10638	0	0	0	167.818	127.139	0	0	0	0	0	1	0		1	0	0	0	1	0	1.07
1384	4	2016-01-04	0	78	58	47	0.531674	52	5	1.10638	0	0	0	172.544	132.551	0	0	0	0	0	1	0			0	0	0	1	0	0.97
1385	4	2017-01-13	0	66	53	45	0.50905	50	5	1.11111	0	0	0	180.089	123.695	0	0	0	0	0	1	0			0	0	0	1	0	0.89
1386	5	2014-12-10	1	60	47	42	0.475113	47	5	1.11905	0	0	0	187.531	101.623	0	0	0	0	0	0	0			0	0	0	1	0	0.99
1387	6	2015-05-18	0	74	54	40	0.452489	45	5	1.125	0	0	0	195.342	113.913	0	0	0	0	0	0	0			0	0	0	1	0	1.11
1388	5	2015-04-01	0	65	60	40	0.452489	45	5	1.125	0	0	0	201.395	144.891	0	0	0	0	0	0	0			0	0	0	1	0	1.19
1389	5	2014-12-08	1	51	64.4654	37	0.418552	42	5	1.13514	0	0	0	218.885	163.901	0	0	1	0	0	0	0			0	0	0	1	0	1.1732
1390	6	2016-06-15	0	48	83	126	1.42534	130	4	1.03175	0	0	0	38.4629	46.6266	0	0		0	0	1	0			0	0	0	2	0	1.23
1391	7	2016-02-03	0	59	51	115	1.3009	119	4	1.03478	0	0	0	55.4058	28.6448	0	0	0	0	0	1	0			1	0	0	1	0	1.1732
1392	7	2013-04-22	0	66	50	102	1.15385	106	4	1.03922	0	0	0	63.6702	31.8174	0	0	0	0	0	1	0			0	0	0	1	0	1.1732
1393	6	2012-09-10	0	6	64.4654	91	1.02941	95	4	1.04396	0	0	0	73.9532	52.4222	0	0	0	0	0	0	0		1	0	0	0	1	0	1.1732
1394	4	2015-02-25	0	52	75	90	1.0181	94	4	1.04444	0	0	0	60.5888	76.4362	0	0	1	0	0	0	0			1	0	1	2	0	1.12
1395	6	2015-07-29	0	59	70	87	0.984163	91	4	1.04598	0	0	0	59.0338	57.2506	0	0	1	0	0	1	1	4		1	0	0	2	0	0.72
1396	3	2012-11-29	1	52	83	87	0.984163	91	4	1.04598	0	0	0	64.6036	93.5264	0	0	0	0	0	1	0			0	0	0	2	0	1.3
1397	6	2014-11-14	0	53	50	86	0.972851	90	4	1.04651	0	0	0	80.5791	48.5127	0	0	0	0	0	1	1			1	0	0	1	0	1.04
1398	5	2016-07-08	1	58	62	84	0.950226	88	4	1.04762	0	0	0	84.6406	68.299	1	0	0	0	0	1	0			0	0	0	1	0	1.12
1399	4	2012-11-15	0	63	79	84	0.950226	88	4	1.04762	0	0	0	64.2188	80.5683	0	0	0	0	0	1	0			0	0	0	2	0	1.28
1400	3	2014-08-25	1	68	62	84	0.950226	88	4	1.04762	0	0	0	93.0543	90.1475	0	0	0	0	0	1	0			0	0	0	1	0	1.13
1401	3	2016-11-11	0	69	74	83	0.938914	87	4	1.04819	0	0	0	67.4891	85.1016	0	0	1	0	0	0	1	4		0	0	0	2	0	1.27
1402	6	2016-09-14	0	68	54	81	0.91629	85	4	1.04938	0	0	0	85.8582	53.9594	0	0	1	0	0	0	0			0	0	0	1	0	1.39
1403	5	2017-03-24	0	72	75	81	0.91629	85	4	1.04938	0	0	0	64.9723	70.3127	0	0	0	0	0	1	0			0	0	0	2	0	1.21
1404	5	2016-02-01	0	56	69	81	0.91629	85	4	1.04938	0	0	0	65.3936	66.5607	0	0	0	0	0	1	0			0	0	0	2	0	1.96
1405	4	2013-04-15	1	76	69	81	0.91629	85	4	1.04938	0	0	0	66.4105	70.7987	0	0	0	0	0	1	1	4		0	0	0	2	0	1.1732
1406	6	2015-05-22	1	64	67	79	0.893665	83	4	1.05063	0	0	0	88.7565	70.2793	0	0	0	0	0	0	0			0	0	0	1	0	1.1732
1407	6	2015-06-26	0	63	42	78	0.882353	82	4	1.05128	0	0	0	88.5113	40.3133	0	0	0	0	0	0	0			0	0	0	1	0	0.78
1408	6	2016-10-18	0	42	49	78	0.882353	82	4	1.05128	0	0	0	90.0392	51.96	0	0	0	0	0	0	0			1	0	0	1	0	0.99
1409	7	2016-09-02	0	44	64.4654	77	0.871041	81	4	1.05195	0	0	0	89.2216	59.8723	0	0	1	0	0	0	0			0	0	0	1	0	1.5
1410	5	2013-04-26	0	66	61	77	0.871041	81	4	1.05195	0	0	0	92.1582	68.379	0	0	0	0	0	0	0			0	0	0	1	0	0.84
1411	5	2016-09-21	0	64	50	77	0.871041	81	4	1.05195	0	0	0	93.7321	60.4955	0	0	0	0	0	0	0			0	0	0	1	0	1.2
1412	5	2013-07-24	0	66	46	75	0.848416	79	4	1.05333	0	0	0	96.768	57.497	1	0	1	0	0	0	0			0	0	0	1	0	0.88
1413	6	2016-11-14	1	67	85	74	0.837104	78	4	1.05405	0	0	0	71.1606	81.7575	0	0	0	0	0	1	0			0	0	0	2	0	1.66
1414	7	2016-04-27	0	46	46	73	0.825792	77	4	1.05479	0	0	0	94.6243	44.1945	0	0	0	0	0	0	0			0	0	0	1	0	1.1732
1415	4	2016-12-28	0	68	64	70	0.791855	74	4	1.05714	0	0	0	107.684	94.6901	0	0	0	0	0	1	0		1	1	0	0	1	0	0.99
1416	6	2014-09-17	0	61	62	69	0.780543	73	4	1.05797	0	0	0	102.064	67.6954	0	0	0	0	0	0	0			1	0	0	1	0	1.1732
1417	6	2011-02-18	1	28	65	69	0.780543	73	4	1.05797	0	0	0	102.464	72.7075	0	0	0	0	0	1	0	2		0	0	0	1	0	1.12
1418	5	2015-03-09	0	5	52	69	0.780543	73	4	1.05797	0	0	0	104.422	64.5188	0	0	1	0	0	0	0			0	0	0	1	0	1.08
1419	3	2016-08-03	1	53	88	69	0.780543	73	4	1.05797	0	0	0	84.5832	125.619	0	0	0	0	0	0	1	4		0	0	0	2	0	1.01
1420	5	2013-01-21	1	62	62.5	68	0.769231	72	4	1.05882	0	0	0	107.447	83.1328	0	0	0	0	0	0	0			0	0	0	1	0	0.84
1421	4	2014-12-31	1	69	77	68	0.769231	72	4	1.05882	0	0	0	81.5482	95.3159	0	0	0	0	0	1	0		1	1	0	0	2	0	1.37
1422	5	2016-06-29	1	57	63	67	0.757919	71	4	1.0597	0	0	0	109.429	85.4946	0	0	0	0	0	1	1	3		0	0	0	1	0	0.77
1423	4	2016-08-19	0	68	52	65	0.735294	69	4	1.06154	0	0	0	115.985	79.7349	0	0	1	0	0	1	0		1	1	0	0	1	0	1.22
1424	4	2014-12-05	0	69	60	65	0.735294	69	4	1.06154	0	0	0	116.892	94.5138	0	0	0	0	0	1	0			1	0	0	1	0	1.32
1425	6	2016-10-09	0	55	42	64	0.723982	68	4	1.0625	0	0	0	111.492	49.9221	0	0	0	0	0	1	0		1	0	0	0	1	0	0.84
1426	5	2016-03-25	1	36	59	64	0.723982	68	4	1.0625	0	0	0	114.214	80.0239	0	0	0	0	0	1	0	1		0	0	0	1	0	1.1732
1427	6	2016-06-01	0	65	50	59	0.667421	63	4	1.0678	0	0	0	122.226	63.6808	0	0	0	0	0	0	0			0	0	1	1	0	1.28
1428	5	2017-02-24	1	45	72	59	0.667421	63	4	1.0678	0	0	0	94.7368	97.3558	0	0	0	0	0	1	1	4		1	0	1	2	0	0.96
1429	4	2012-11-07	0	71	57	59	0.667421	63	4	1.0678	0	0	0	130.595	98.6136	0	0	0	0	0	0	0			0	0	0	1	0	1.51
1430	4	2016-07-20	0	67	70	59	0.667421	63	4	1.0678	0	0	0	98.8936	109.655	0	0	1	0	0	1	0			0	0	0	2	0	1.21
1431	6	2017-03-03	0	58	64.4654	58	0.656109	62	4	1.06897	0	0	0	126.623	91.4796	0	0	1	0	0	0	1			0	0	0	1	0	1.4
1432	5	2015-04-17	0	71	63	58	0.656109	62	4	1.06897	0	0	0	129.49	99.5612	0	1	0	0	0	0	0			1	0	0	1	0	0.73
1433	5	2016-03-16	1	61	64.4654	57	0.644796	61	4	1.07018	0	0	0	130.758	98.9318	0	0	0	0	0	0	0			0	0	0	1	0	1.17
1434	4	2016-01-18	0	72	71	57	0.644796	61	4	1.07018	0	0	0	99.7967	104.205	0	0	1	0	0	0	0		1	1	0	0	2	0	1.25
1435	4	2015-09-30	1	73	58	55	0.622172	59	4	1.07273	0	0	0	141.458	107.237	0	0	0	0	0	1	0			0	0	0	1	0	1.18
1436	5	2016-04-13	1	70	47	53	0.599548	57	4	1.07547	0	0	0	143.448	80.6983	0	0	0	0	0	0	1	3		1	0	0	1	0	0.97
1437	6	2016-06-06	0	57	60	52	0.588235	56	4	1.07692	0	0	0	143.457	94.3578	0	0	1	0	0	0	0		1	0	0	0	1	0	1.38
1438	4	2016-04-22	0	78	49	51	0.576923	55	4	1.07843	0	0	0	153.331	95.4951	0	0	0	0	0	0	0			0	0	0	1	0	0.95
1439	5	2016-08-24	0	45	48	49	0.554299	53	4	1.08163	0	0	0	156.014	86.53	0	1	1	0	0	0	0		1	1	0	0	1	0	1.58
1440	4	2014-04-24	1	61	64.4654	43	0.486425	47	4	1.09302	0	0	0	187.15	150.29	0	0	1	0	0	1	0		1	0	0	0	1	0	1.1732
1441	6	2014-10-20	0	73	45	109	1.23303	112	3	1.02752	0	0	0	60.6213	32.3973	0	0	0	0	0	1	0			0	0	0	1	0	1.34
1442	2	2015-06-29	0	66	63	101	1.14253	104	3	1.0297	0	0	0	75.4952	76.7247	0	0	0	0	0	0	0			0	0	0	1	0	1.11
1443	6	2016-09-19	0	64	74	98	1.1086	101	3	1.03061	0	0	0	51.6325	54.6787	0	1	1	0	0	1	1	4		0	0	0	2	0	1.25
1444	6	2011-11-28	1	68	58.2	97	1.09729	100	3	1.03093	0	0	0	69.9882	49.5363	0	0	0	0	0	0	0			0	0	0	1	0	1.1
1445	6	2015-08-05	0	68	74	96	1.08597	99	3	1.03125	0	0	0	52.7653	55.2294	0	0	0	0	0	1	0			0	0	0	2	0	1.15
1446	5	2011-05-17	1	74	66	92	1.04072	95	3	1.03261	0	0	0	76.3015	66.7355	0	0	0	0	0	1	0			0	0	0	1	0	0.75
1447	4	2015-07-07	0	75	69	90	1.0181	93	3	1.03333	0	0	0	59.124	64.9792	1	0	1	0	0	1	0	2		1	0	0	2	0	2.07
1448	4	2015-09-09	1	67	74	89	1.00679	92	3	1.03371	0	0	0	61.3281	76.0932	0	0	0	0	0	1	1	4		0	0	0	2	0	1.28
1449	7	2015-02-04	1	40	64.4654	85	0.961538	88	3	1.03529	0	0	0	79.125	51.9438	0	0	1	0	0	0	0		1	1	0	0	1	0	1.37
1450	5	2012-10-10	0	58	65.5	85	0.961538	88	3	1.03529	0	0	0	83.914	72.8039	0	0	0	0	0	0	0			0	0	0	1	0	1.2
1451	4	2015-07-15	0	23	65	84	0.950226	87	3	1.03571	0	0	0	88.9154	84.837	0	0	1	0	0	1	0		2	0	0	0	1	0	1.09
1452	6	2015-07-17	0	36	45	83	0.938914	86	3	1.03614	0	0	0	83.5336	44.0523	0	0	0	0	0	0	0			0	0	0	1	0	2.07
1453	5	2016-01-06	0	40	62	80	0.904977	83	3	1.0375	0	0	0	88.496	68.046	1	0	1	0	0	1	0			0	0	0	1	0	1.02
1454	6	2016-04-01	0	72	59	80	0.904977	83	3	1.0375	0	0	0	85.9858	55.3091	0	0	0	0	0	1	1			1	0	0	1	0	1.09
1455	6	2015-06-12	0	4	80	79	0.893665	82	3	1.03797	0	0	0	66.174	73.1176	0	0	0	0	0	0	0		1	0	0	0	2	0	1.35
1456	4	2015-05-15	1	65	64.4654	77	0.871041	80	3	1.03896	0	0	0	98.3849	91.9911	0	0	0	0	0	1	0		1	1	0	0	1	0	1.45
1457	3	2016-03-21	0	56	88	77	0.871041	80	3	1.03896	0	0	0	73.3853	108.274	0	0	0	0	0	0	0			0	0	0	2	0	1.1
1458	5	2012-09-19	1	55	77.6	76	0.859729	79	3	1.03947	0	0	0	69.9894	77.8371	0	0	0	0	0	1	0			0	0	0	2	0	1.98
1459	5	2011-07-27	0	63	51.9	76	0.859729	79	3	1.03947	0	0	0	95.938	65.7431	0	0	0	0	0	1	1	3		1	0	0	1	0	1.02
1460	4	2012-03-13	1	7	60	76	0.859729	79	3	1.03947	0	0	0	97.2849	79.9658	0	0	0	0	0	1	0			0	0	0	1	0	1.13
1461	4	2016-03-25	1	47	78	76	0.859729	79	3	1.03947	0	0	0	72.9317	91.4052	0	0	1	0	0	0	0			0	0	0	2	0	1.1732
1462	5	2013-01-28	1	51	77	75	0.848416	78	3	1.04	0	0	0	70.9645	77.7514	0	0	0	0	0	1	0			0	0	0	2	0	1.04
1463	5	2017-03-01	0	54	54	75	0.848416	78	3	1.04	0	0	0	97.1756	68.6493	0	0	1	0	0	0	0			0	0	0	1	0	0.78
1464	4	2015-02-27	1	64	70	75	0.848416	78	3	1.04	0	0	0	73.1275	79.7136	0	0	0	0	0	0	0			0	0	0	2	0	1.19
1465	5	2016-03-30	0	69	57	73	0.825792	76	3	1.0411	0	0	0	99.31	71.596	0	0	0	0	0	0	0	2		1	0	0	1	0	1.21
1466	5	2017-01-16	0	50	73	72	0.81448	75	3	1.04167	0	0	0	74.924	79.2652	0	0	0	0	0	0	0			1	0	0	2	0	1.06
1467	5	2014-03-26	0	65	65	72	0.81448	75	3	1.04167	0	0	0	102.209	87.2213	0	0	0	0	0	0	0			0	0	1	1	0	1.1732
1468	5	2016-10-31	1	60	79	71	0.803167	74	3	1.04225	0	0	0	76.8677	90.4337	0	0	0	0	0	0	0			0	0	0	2	0	1.1732
1469	4	2016-07-08	0	59	69	71	0.803167	74	3	1.04225	0	0	0	77.7025	82.2513	0	0	1	0	0	1	0			0	0	0	2	0	1.08
1470	4	2015-05-06	0	67	64	71	0.803167	74	3	1.04225	0	0	0	105.986	93.4989	0	0	0	0	0	0	0			0	0	0	1	0	1.19
1471	5	2012-12-20	0	62	68	69	0.780543	72	3	1.04348	0	0	0	79.3687	79.7964	0	0	1	0	0	1	0			0	0	0	2	0	1.08
1472	5	2015-01-05	1	55	59	68	0.769231	71	3	1.04412	0	0	0	108.055	80.4153	0	0	0	0	0	1	0			1	0	0	1	0	1.15
1473	4	2015-03-16	1	61	75	67	0.757919	70	3	1.04478	0	0	0	83.6648	97.0776	0	0	1	0	0	1	0			0	0	0	2	0	1.1732
1474	6	2014-12-26	1	63	64.4654	66	0.746606	69	3	1.04545	0	0	0	108.941	79.8293	0	0	0	0	0	1	0		2	1	0	0	1	0	1.12
1475	6	2016-01-20	1	34	50	66	0.746606	69	3	1.04545	0	0	0	109.041	62.2247	0	0	1	0	0	0	0			0	0	0	1	0	1.73
1476	5	2016-05-30	0	60	54	66	0.746606	69	3	1.04545	0	0	0	112.054	76.4308	0	0	0	0	0	0	0	2		1	0	0	1	0	0.96
1477	2	2015-11-12	1	56	105	66	0.746606	69	3	1.04545	0	0	0	94.824	176.905	0	0	0	0	0	0	0			0	0	1	2	0	1.1732
1478	7	2015-11-02	0	39	41	63	0.71267	66	3	1.04762	0	0	0	112.633	47.0027	0	0	1	0	0	0	0			1	0	0	1	0	1.1732
1479	4	2012-10-25	1	48	64.5	62	0.701357	65	3	1.04839	0	0	0	123.402	106.4	0	0	0	0	0	1	0			0	0	0	1	0	1.23
1480	2	2017-02-20	0	74	61	61	0.690045	64	3	1.04918	0	0	0	138.776	129.068	0	0	0	0	0	1	0	2		0	0	0	1	0	1.27
1481	4	2016-02-22	1	84	50	59	0.667421	62	3	1.05085	0	0	0	128.982	82.7688	0	0	0	0	0	1	0			0	0	0	1	0	1.13
1482	5	2015-05-04	0	74	64.4654	58	0.656109	61	3	1.05172	0	0	0	130.274	104.49	0	0	0	0	0	0	1	4		0	0	0	1	0	0.64
1483	5	2015-01-07	0	6	59	57	0.644796	60	3	1.05263	0	0	0	132.966	97.4626	0	0	0	0	0	1	0			1	0	0	1	0	1.32
1484	4	2016-04-22	1	66	53	57	0.644796	60	3	1.05263	0	0	0	134.203	90.7727	0	0	0	0	0	1	0			0	0	0	1	0	0.89
1485	6	2014-06-11	1	7	63	50	0.565611	53	3	1.06	0	0	0	150.525	104.611	0	0	0	0	0	1	0			1	0	0	1	0	0.93
1486	3	2015-12-25	0	67	53	44	0.497738	47	3	1.06818	0	0	0	189.824	136.437	0	0	0	0	0	1	0			0	0	0	1	0	1.1732
1487	5	2015-03-18	0	56	64	147	1.6629	149	2	1.01361	0	0	0	44.3651	40.2591	0	0	0	0	0	0	1	3		0	0	0	1	0	0.77
1488	3	2014-05-05	1	67	78	141	1.59502	143	2	1.01418	0	0	0	37.2249	54.9954	1	0	0	0	0	1	0			0	0	0	2	0	0.93
1489	6	2012-07-16	1	72	62	127	1.43665	129	2	1.01575	0	0	0	50.8906	38.6252	0	0	1	0	0	0	0			0	0	1	1	0	1.19
1490	6	2012-12-10	0	54	65	121	1.36878	123	2	1.01653	0	0	0	54.4378	45.2542	0	0	0	0	0	1	1	4		0	0	1	1	0	1.69
1491	6	2017-06-16	0	40	67	106	1.1991	108	2	1.01887	0	0	0	63.1035	51.8613	0	0	0	0	0	0	0			0	0	0	1	0	1.1732
1492	7	2013-07-03	0	37	60	103	1.16516	105	2	1.01942	0	0	0	63.7881	41.7075	0	0	0	0	0	0	0			0	0	0	1	0	1.12
1493	3	2015-04-13	0	24	73	103	1.16516	105	2	1.01942	0	0	0	53.3847	70.157	0	0	0	0	0	1	0			0	0	0	2	0	1.16
1494	6	2013-07-24	1	51	66	102	1.15385	104	2	1.01961	0	0	0	65.2152	49.7105	0	0	0	0	0	1	0			1	0	0	1	0	0.76
1495	5	2014-11-17	0	69	57	100	1.13122	102	2	1.02	0	0	0	68.1934	49.3085	0	0	0	0	0	0	0			0	0	0	1	0	1.1732
1496	5	2014-02-10	1	67	59	100	1.13122	102	2	1.02	0	0	0	69.6798	56.1153	0	0	1	0	0	1	0		1	0	0	0	1	0	0.95
1497	5	2017-03-06	1	77	64.4654	99	1.11991	101	2	1.0202	0	0	0	51.6574	49.9507	0	0	1	0	0	0	0			0	0	0	2	0	1.44
1498	6	2016-12-28	0	47	65	96	1.08597	98	2	1.02083	0	0	0	71.1206	57.1074	0	0	1	0	0	0	0		1	0	0	0	1	0	0.81
1499	6	2014-05-08	0	39	64.4654	95	1.07466	97	2	1.02105	0	0	0	71.8896	56.8436	0	0	1	0	0	0	0			0	0	0	1	0	1.48
1500	4	2015-05-15	0	78	58	95	1.07466	97	2	1.02105	0	0	0	76.1821	64.512	0	0	1	0	0	1	1	3		0	0	0	1	0	1.38
1501	5	2014-08-18	0	42	60	91	1.02941	93	2	1.02198	0	0	0	77.2078	61.129	0	0	0	0	0	0	0	2		0	0	0	1	0	1.13
1502	5	2014-06-27	0	7	67	91	1.02941	93	2	1.02198	0	0	0	78.0863	71.4209	0	0	0	0	0	1	0			1	0	0	1	0	1.1732
1503	6	2015-06-16	0	56	64	89	1.00679	91	2	1.02247	0	0	0	76.9329	57.8575	0	0	1	0	0	0	1	3		0	0	1	1	0	1.14
1504	6	2012-07-25	1	39	80	89	1.00679	91	2	1.02247	0	0	0	57.5261	64.0771	0	0	0	0	0	1	0			0	0	0	2	0	1.33
1505	4	2016-12-30	0	50	64.4654	84	0.950226	86	2	1.02381	0	0	0	86.1102	75.9662	0	1	0	0	0	0	0		1	0	0	0	1	0	0.95
1506	4	2014-01-29	0	42	53	83	0.938914	85	2	1.0241	0	0	0	89.6528	68.9042	0	0	0	0	0	0	0			1	0	0	1	0	1.1732
1507	7	2016-08-12	0	62	59	82	0.927602	84	2	1.02439	0	0	0	82.2556	48.2966	0	0	0	0	0	1	0			0	0	0	1	0	1.1732
1508	5	2015-11-11	1	73	74	82	0.927602	84	2	1.02439	0	0	0	63.9256	67.8764	0	0	0	0	0	0	1			0	0	0	2	0	1.52
1509	6	2016-09-19	0	66	56	81	0.91629	83	2	1.02469	0	0	0	85.7113	55.4254	0	0	0	0	0	0	0			0	0	0	1	0	1.42
1510	4	2016-07-18	0	36	67	81	0.91629	83	2	1.02469	0	0	0	89.8052	81.8911	0	0	0	0	0	1	1			0	0	0	1	0	1.1732
1511	6	2015-10-09	0	67	60	80	0.904977	82	2	1.025	0	0	0	86.4344	58.0857	0	0	0	0	0	0	0			0	0	0	1	0	1.11
1512	5	2016-08-03	1	67	68	80	0.904977	82	2	1.025	0	0	0	66.2402	65.9955	0	0	0	0	0	1	0			1	0	0	2	0	0.92
1513	4	2012-04-18	0	68	59.8	80	0.904977	82	2	1.025	0	0	0	91.3661	74.7764	0	0	0	0	0	0	0		1	1	0	0	1	0	0.7
1514	5	2014-04-14	0	63	64	79	0.893665	81	2	1.02532	0	0	0	90.1217	72.3564	0	0	0	0	0	0	1	3		1	0	1	1	0	0.79
1515	4	2012-11-07	0	62	54	79	0.893665	81	2	1.02532	0	0	0	92.278	67.2565	0	0	1	0	0	0	0			0	0	0	1	0	0.97
1516	4	2016-06-17	0	66	92	79	0.893665	81	2	1.02532	0	0	0	68.9854	100.035	0	0	0	0	0	1	0			0	0	0	2	0	1.3
1517	6	2014-04-14	0	58	71	78	0.882353	80	2	1.02564	0	0	0	66.0577	60.0423	0	0	0	0	0	0	0		1	0	0	0	2	0	1.45
1518	6	2016-04-21	0	21	67	78	0.882353	80	2	1.02564	0	0	0	89.7004	69.6113	0	0	1	0	0	1	0			0	0	0	1	0	1.1732
1519	4	2015-12-09	1	36	58	77	0.871041	79	2	1.02597	0	0	0	95.2663	74.733	0	0	0	0	0	1	0	1		0	0	0	1	0	0.8
1520	5	2015-07-01	0	59	62	75	0.848416	77	2	1.02667	0	0	0	97.5988	80.1598	0	0	0	0	0	0	0			0	0	0	1	0	1.1732
1521	3	2014-10-20	0	73	82	75	0.848416	77	2	1.02667	0	0	0	75.5715	103.301	0	0	1	0	0	0	0			0	0	0	2	0	0.94
1522	3	2012-12-19	0	49	72	74	0.837104	76	2	1.02703	0	0	0	78.3944	96.9058	0	0	1	0	0	1	0			0	0	0	2	0	1.64
1523	4	2014-01-06	0	65	69	73	0.825792	75	2	1.0274	0	0	0	77.6258	88.2433	1	0	0	0	1	0	0			0	0	0	2	0	0.92
1524	4	2016-03-09	0	72	63	72	0.81448	74	2	1.02778	0	0	0	102.767	86.28	0	0	0	0	0	0	0			1	0	0	1	0	1.25
1525	4	2016-10-09	0	71	56	71	0.803167	73	2	1.02817	0	0	0	104.873	78.9435	0	0	0	0	0	0	0	2		0	0	0	1	0	1.1732
1526	4	2016-11-02	0	56	65	70	0.791855	72	2	1.02857	0	0	0	106.171	91.5905	0	0	0	0	0	1	0			0	0	0	1	0	1.1732
1527	5	2015-04-10	0	69	70	69	0.780543	71	2	1.02899	0	0	0	77.9168	75.8519	0	0	0	0	0	1	0			0	0	0	2	0	1.25
1528	5	2015-09-18	0	69	66	69	0.780543	71	2	1.02899	0	0	0	105.384	85.5346	0	0	1	0	0	1	0			1	0	0	1	0	1.06
1529	6	2016-04-28	0	59	45	68	0.769231	70	2	1.02941	0	0	0	103.847	50.0055	0	0	0	0	0	0	1	3		0	0	0	1	0	1.62
1530	5	2014-11-12	0	77	58	68	0.769231	70	2	1.02941	0	0	0	108.262	79.6864	0	0	1	0	0	0	0			0	0	0	1	0	0.77
1531	5	2014-11-27	0	72	62	68	0.769231	70	2	1.02941	0	0	0	109.331	88.5619	0	0	0	0	0	1	0		1	0	0	0	1	0	1.1732
1532	4	2017-03-15	1	68	64.4654	68	0.769231	70	2	1.02941	0	0	0	81.3947	79.2522	0	1	0	0	0	1	0			1	0	0	2	0	1.1732
1533	5	2012-11-15	1	71	66	67	0.757919	69	2	1.02985	0	0	0	110.144	92.0808	0	0	0	0	0	1	1	4		0	0	0	1	0	0.68
1534	6	2014-06-23	0	64	49	65	0.735294	67	2	1.03077	0	0	0	109.319	56.7049	0	0	0	0	0	1	1			0	0	0	1	0	1.02
1535	5	2017-01-06	0	77	62	65	0.735294	67	2	1.03077	0	0	0	112.182	82.7735	0	0	0	0	0	1	0			0	0	0	1	0	0.91
1536	3	2012-12-20	0	52	78	65	0.735294	67	2	1.03077	0	0	0	90.2037	116.892	0	0	0	0	0	1	0		1	1	0	0	2	0	2.04
1537	4	2015-03-09	1	62	78	64	0.723982	66	2	1.03125	0	0	0	88.2905	106.031	0	0	0	0	0	0	0			0	0	0	2	0	1.32
1538	3	2012-11-12	0	65	67	64	0.723982	66	2	1.03125	0	0	0	91.2289	100.294	0	0	1	0	0	1	0	2		1	0	0	2	0	1.1732
1539	5	2016-11-16	0	69	57	63	0.71267	65	2	1.03175	0	0	0	116.564	79.3662	0	1	0	0	0	0	0			0	0	1	1	0	1.1732
1540	3	2014-12-10	0	72	65	63	0.71267	65	2	1.03175	0	0	0	128.464	123.549	0	0	0	0	0	1	0			0	0	0	1	0	1.18
1541	3	2016-11-02	0	69	61	62	0.701357	64	2	1.03226	0	0	0	126.839	109.294	0	0	0	0	0	0	0			1	0	0	1	0	1.1732
1542	6	2016-04-25	0	65	60	61	0.690045	63	2	1.03279	0	0	0	119.437	80.8563	0	0	1	0	0	0	0			0	0	1	1	0	1.38
1543	5	2015-03-20	0	66	54	61	0.690045	63	2	1.03279	0	0	0	121.772	79.9948	0	0	1	0	0	1	0			1	0	0	1	0	1.14
1544	5	2016-08-31	1	47	64.4654	58	0.656109	60	2	1.03448	0	0	0	128.245	97.5326	0	0	1	0	0	0	0			1	0	0	1	0	1.03
1545	4	2015-04-24	1	65	81	53	0.599548	55	2	1.03774	0	0	0	111.426	139.434	0	0	1	0	0	0	0			0	0	0	2	0	1.05
1546	5	2015-01-21	0	55	50	52	0.588235	54	2	1.03846	0	0	0	144.768	82.4287	0	0	0	0	0	1	0		1	1	0	0	1	0	1.08
1547	3	2016-11-02	0	70	47	52	0.588235	54	2	1.03846	0	0	0	154.954	99.65	0	0	0	0	0	1	0			0	0	0	1	0	0.98
1548	4	2015-11-25	0	74	49	50	0.565611	52	2	1.04	0	0	0	156.847	97.3423	1	0	0	0	0	0	0			1	0	0	1	0	0.98
1549	5	2014-07-21	0	61	50	49	0.554299	51	2	1.04082	0	0	0	158.361	96.1834	1	0	1	0	0	1	0			1	0	0	1	0	1.52
1550	3	2016-07-25	1	42	63	49	0.554299	51	2	1.04082	0	0	0	166.11	142.119	0	0	1	0	0	1	0			0	0	0	1	0	0.94
1551	5	2017-02-08	0	71	47	47	0.531674	49	2	1.04255	0	0	0	166.962	96.0728	0	0	0	0	0	0	0			0	0	0	1	0	1.07
1552	5	2017-05-05	1	77	64.4654	45	0.50905	47	2	1.04444	0	0	0	127.917	108.347	0	0	1	0	0	0	0			0	0	0	2	0	1.1732
1553	4	2014-09-24	1	63	63	45	0.50905	47	2	1.04444	0	0	0	179.689	146.002	0	0	0	0	0	1	0			0	0	0	1	0	0.84
1554	4	2014-11-24	1	69	63	43	0.486425	45	2	1.04651	0	0	0	186.359	144.661	0	0	1	0	0	0	0			0	0	0	1	0	0.88
1555	4	2016-01-04	1	72	55	43	0.486425	45	2	1.04651	0	0	0	188.773	132.04	0	0	0	0	0	1	1	4		0	0	0	1	0	0.51
1556	4	2013-10-23	0	56	54	42	0.475113	44	2	1.04762	0	0	0	194.863	134.702	1	0	0	0	0	0	0			1	0	0	1	0	1.1732
1557	5	2016-07-06	0	60	104	115	1.3009	116	1	1.0087	0	0	0	43.0757	66.5952	0	0	0	0	0	0	0			0	0	0	2	0	1.29
1558	6	2016-08-19	1	52	67	108	1.22172	109	1	1.00926	0	0	0	61.7465	50.855	0	0	1	0	0	1	0			0	0	0	1	0	1.1732
1559	6	2015-11-30	0	63	52	107	1.21041	108	1	1.00935	0	0	0	62.2018	39.1028	0	0	0	0	0	0	0			0	0	0	1	0	1.49
1560	3	2014-04-21	0	63	80	97	1.09729	98	1	1.01031	0	0	0	56.2958	78.419	0	0	0	0	0	0	0			0	0	0	2	0	1.1732
1561	6	2015-11-11	0	59	64.4654	96	1.08597	97	1	1.01042	0	0	0	70.3661	53.4664	0	0	0	0	0	0	0			0	0	0	1	0	0.74
1562	4	2015-04-01	1	69	70	96	1.08597	97	1	1.01042	0	0	0	54.5636	60.5062	0	0	0	0	0	1	0	2		1	0	0	2	0	2.13
1563	3	2015-10-21	1	61	80	87	0.984163	88	1	1.01149	0	0	0	63.6214	86.6807	0	0	1	0	0	1	0			0	0	0	2	0	1.74
1564	6	2015-07-20	0	56	53	84	0.950226	85	1	1.0119	0	0	0	82.0935	50.2516	1	0	0	0	0	0	0	2	1	1	0	0	1	0	1.02
1565	5	2013-06-28	0	64	64.4654	81	0.91629	82	1	1.01235	0	0	0	88.1519	73.2328	0	0	0	0	0	0	0			0	0	0	1	0	1.66
1566	4	2015-03-20	0	74	70	81	0.91629	82	1	1.01235	0	0	0	67.1071	74.5526	0	0	1	0	0	0	0			1	0	0	2	0	1.32
1567	3	2015-10-09	1	61	66	80	0.904977	81	1	1.0125	0	0	0	94.457	91.49	1	0	0	0	0	1	0			0	0	0	1	0	1.38
1568	3	2016-08-24	0	64	103	79	0.893665	80	1	1.01266	0	0	0	73.3653	132.528	0	0	0	0	0	0	0			0	0	0	2	0	1.14
1569	4	2016-10-21	0	45	78	78	0.882353	79	1	1.01282	0	0	0	71.5675	92.0951	0	0	0	0	0	1	0			0	0	0	2	0	1.1732
1570	5	2014-05-29	1	58	60	77	0.871041	78	1	1.01299	0	0	0	92.5756	68.7258	0	0	0	0	0	0	0			1	0	0	1	0	0.89
1571	5	2016-01-27	0	62	54	77	0.871041	78	1	1.01299	0	0	0	93.6388	65.0639	0	1	0	0	0	1	0			0	0	0	1	0	0.81
1572	3	2015-02-27	1	65	73	76	0.859729	77	1	1.01316	0	0	0	74.2029	90.017	0	0	0	0	0	1	0			1	0	0	2	0	0.96
1573	3	2014-09-17	0	52	85	75	0.848416	76	1	1.01333	0	0	0	77.2	112.913	0	0	0	0	0	1	0			0	0	0	2	0	1.13
1574	2	2016-09-12	0	67	53	75	0.848416	76	1	1.01333	0	0	0	106.126	86.423	0	0	0	0	0	1	1			1	0	0	1	0	2
1575	6	2016-09-07	0	62	71	74	0.837104	75	1	1.01351	0	0	0	70.7355	66.1381	1	0	0	0	0	1	0			0	0	0	2	0	1.31
1576	4	2017-03-03	0	71	67	74	0.837104	75	1	1.01351	0	0	0	102.108	97.02	0	0	1	0	0	0	1			0	0	0	1	0	1.1732
1577	3	2017-03-13	1	60	64.4654	74	0.837104	75	1	1.01351	0	0	0	76.8509	82.5953	0	0	0	0	0	1	1	4		0	0	0	2	0	1.13
1578	5	2016-01-11	0	20	54	73	0.825792	74	1	1.0137	0	0	0	100.268	70.5674	0	0	0	0	0	1	0			0	0	0	1	0	0.78
1579	3	2013-03-20	0	5	52	72	0.81448	73	1	1.01389	0	0	0	110.393	86.9431	0	0	0	0	0	1	0			1	0	0	1	0	1.15
1580	3	2015-10-10	1	6	70	70	0.791855	71	1	1.01429	0	0	0	83.3936	99.0659	0	0	1	0	0	1	0			1	0	0	2	0	1.93
1581	5	2016-02-22	1	36	62	69	0.780543	70	1	1.01449	0	0	0	105.18	79.6404	0	0	1	0	0	0	0			0	0	0	1	0	1.09
1582	6	2015-04-22	0	58	67	68	0.769231	69	1	1.01471	0	0	0	77.8999	67.5048	0	0	0	0	0	0	0		1	0	0	0	2	0	1.1732
1583	5	2015-03-16	1	59	53	68	0.769231	69	1	1.01471	0	0	0	106.862	68.7663	0	0	1	0	0	1	1	4		0	0	0	1	0	1.1732
1584	3	2015-11-09	0	75	58	67	0.757919	68	1	1.01493	0	0	0	119.39	103.167	1	0	0	0	0	1	0			1	0	0	1	0	1.03
1585	4	2016-11-28	1	37	50	67	0.757919	68	1	1.01493	0	0	0	111.796	73.8976	0	0	0	0	0	0	0			0	0	0	1	0	1.1732
1586	4	2014-10-15	1	66	64.4654	65	0.735294	66	1	1.01538	0	0	0	117.821	104.183	1	0	0	0	0	1	0			1	0	0	1	0	1.1732
1587	6	2015-01-21	1	63	65	63	0.71267	64	1	1.01587	0	0	0	115.881	87.9544	0	0	0	0	0	0	1			0	0	0	1	0	0.95
1588	6	2016-12-12	0	7	52	60	0.678733	61	1	1.01667	0	0	0	121.619	70.8732	0	0	0	0	0	1	0			0	0	0	1	0	1.1
1589	6	2017-03-09	1	63	64.4654	59	0.667421	60	1	1.01695	0	0	0	91.8225	75.1089	0	0	0	0	0	1	0			0	0	0	2	0	1.18
1590	6	2016-03-23	0	69	51	59	0.667421	60	1	1.01695	0	0	0	124.068	70.8948	0	0	0	0	0	0	0			0	0	0	1	0	1.1732
1591	6	2014-12-31	1	57	54	58	0.656109	59	1	1.01724	0	0	0	126.318	75.6327	0	0	1	0	0	1	0			0	0	0	1	0	1.11
1592	6	2011-07-26	1	59	43.6	58	0.656109	59	1	1.01724	0	0	0	127.42	63.9213	0	0	0	0	0	1	0			0	0	0	1	0	1.1732
1593	7	2015-03-30	1	68	62	56	0.633484	57	1	1.01786	0	0	0	129.109	80.2859	0	0	0	0	0	1	0			0	0	0	1	0	1.4
1594	5	2015-05-20	1	64	64.4654	56	0.633484	57	1	1.01786	0	0	0	136.202	109.972	0	0	0	0	0	1	1	4		0	0	0	1	0	1.1
1595	3	2015-07-29	0	70	70	56	0.633484	57	1	1.01786	0	0	0	105.746	117.731	0	0	1	0	0	1	1			0	0	0	2	0	0.84
1596	5	2015-02-04	1	63	77	55	0.622172	56	1	1.01818	0	0	0	102.791	111.953	0	0	0	0	0	1	0			0	0	0	2	0	1.46
1597	5	2014-04-16	0	65	52	55	0.622172	56	1	1.01818	0	0	0	139.667	91.8438	0	0	0	0	0	1	0			0	0	0	1	0	1.1732
1598	4	2016-05-09	0	67	72	54	0.61086	55	1	1.01852	0	0	0	107.82	117.449	0	0	0	0	0	1	0			0	0	0	2	0	0.95
1599	6	2015-10-23	0	61	55	53	0.599548	54	1	1.01887	0	0	0	140.447	85.2187	0	0	0	0	0	1	0			0	0	0	1	0	1.1732
1600	5	2014-08-22	0	71	43	52	0.588235	53	1	1.01923	0	0	0	145.198	71.9234	0	0	0	0	0	0	0			0	0	0	1	0	1.1732
1601	4	2016-06-01	0	69	70	52	0.588235	53	1	1.01923	0	0	0	113.513	121.561	0	0	1	0	0	0	0			0	0	0	2	0	1.1732
1602	3	2017-03-10	0	70	64.4654	52	0.588235	53	1	1.01923	0	0	0	115.49	117.589	0	0	0	0	0	0	0			0	0	0	2	0	0.95
1603	5	2014-11-24	1	58	58	45	0.50905	46	1	1.02222	0	0	0	176.236	125.674	0	0	0	0	0	1	0			0	0	0	1	0	1.1732
1604	2	2016-04-25	1	66	83	38	0.429864	39	1	1.02632	0	0	0	174.241	231.313	0	0	0	0	0	1	0			0	0	0	2	0	1.1732
1605	5	2012-07-12	1	7	36.4	34	0.384615	35	1	1.02941	0	0	0	239.846	98.1584	0	0	0	0	0	0	0			0	0	0	1	0	1.1732
1606	5	2016-12-30	1	74	75	156	1.76471	156	0	1	0	0	0	30.4631	36.3243	1	1	1	0	0	1	0			1	0	0	2	0	1.14
1607	5	2015-03-18	1	31	61	154	1.74208	154	0	1	0	0	0	41.896	36.0682	0	0	0	0	0	1	0		1	0	0	0	1	0	1.1732
1608	4	2016-06-20	0	25	62	121	1.36878	121	0	1	0	0	0	57.662	54.2499	0	0	1	0	0	0	0			0	0	0	1	0	1.17
1609	6	2016-02-29	0	48	90	120	1.35747	120	0	1	0	0	0	40.0537	48.5215	0	0	0	0	0	1	0			1	0	0	2	0	0.9
1610	5	2014-09-19	1	66	70	111	1.25566	111	0	1	0	0	0	44.9301	46.7293	0	0	1	0	0	1	0		1	0	0	0	2	0	0.97
1611	5	2015-07-20	1	49	77	107	1.21041	107	0	1	0	0	0	47.2849	55.5048	0	0	1	0	0	1	0			0	0	0	2	0	1.41
1612	6	2013-07-03	0	55	65	100	1.13122	100	0	1	0	0	0	67.2771	52.4049	0	0	0	0	0	1	0		1	0	0	0	1	0	0.82
1613	4	2015-07-20	0	55	69	99	1.11991	99	0	1	0	0	0	53.0505	59.4068	0	0	1	0	0	0	0			0	0	0	2	0	1.21
1614	3	2014-12-03	1	61	75	99	1.11991	99	0	1	0	0	0	55.8533	74.9026	0	0	1	0	0	1	0			0	0	0	2	0	1.01
1615	5	2016-06-03	1	33	65	92	1.04072	92	0	1	0	0	0	76.5294	66.5371	0	0	0	0	0	1	0			1	0	0	1	0	0.82
1616	5	2017-03-17	0	53	68	92	1.04072	92	0	1	0	0	0	56.8942	59.6276	0	0		0	0	1	0			1	0	0	2	0	0.94
1617	3	2016-04-20	0	74	68	90	1.0181	90	0	1	0	0	0	61.4427	72.0392	0	0	0	0	0	0	0			0	0	0	2	0	1.12
1618	6	2016-08-19	0	61	60	88	0.995475	88	0	1	0	0	0	78.5575	57.2247	0	0	1	0	0	0	0			0	0	0	1	0	1.15
1619	5	2016-05-30	0	36	72	88	0.995475	88	0	1	0	0	0	60.007	66.5218	0	0	0	0	0	1	0			0	0	0	2	0	1.1732
1620	5	2016-11-14	1	66	65	88	0.995475	88	0	1	0	0	0	80.8886	70.7094	0	0	1	0	0	0	0		2	1	0	1	1	0	0.97
1621	4	2016-12-14	0	63	76	88	0.995475	88	0	1	0	0	0	62.2968	79.6453	0	0	1	0	0	1	1	3		0	0	1	2	0	0.67
1622	6	2012-08-13	0	68	61.5	87	0.984163	87	0	1	0	0	0	78.6915	55.7104	0	0	0	0	0	1	0			0	0	0	1	0	1.29
1623	6	2015-07-13	0	6	54	86	0.972851	86	0	1	0	0	0	80.8689	53.3674	0	0	0	0	0	0	1	4		0	0	0	1	0	0.8
1624	4	2016-10-26	0	64	66	85	0.961538	85	0	1	0	0	0	86.5231	81.7751	1	0	0	0	0	1	0			0	0	0	1	0	0.67
1625	3	2014-11-03	0	47	89	85	0.961538	85	0	1	0	0	0	65.5083	99.3359	0	0	1	0	0	0	0			0	0	0	2	0	0.7
1626	5	2016-09-19	1	64	69	83	0.938914	83	0	1	0	0	0	64.197	67.5881	0	0	0	0	0	0	0			0	0	0	2	0	1.1732
1627	5	2016-11-25	0	69	74	82	0.927602	82	0	1	0	0	0	64.8198	72.108	0	0	0	0	0	0	0			0	0	0	2	0	1.48
1628	4	2016-09-19	0	32	60	82	0.927602	82	0	1	0	0	0	90.7391	78.5056	0	0	0	0	0	1	0	2		0	0	0	1	0	1.1732
1629	4	2015-04-15	1	26	62	82	0.927602	82	0	1	0	0	0	90.7775	81.2242	0	0	0	0	0	0	0			0	0	0	1	0	1.1732
1630	4	2015-02-27	1	55	64.4654	82	0.927602	82	0	1	0	0	0	91.3886	86.1015	0	0	1	0	0	0	1	2		0	0	0	1	0	1.09
1631	3	2012-06-11	0	68	59	81	0.91629	81	0	1	0	0	0	93.8531	82.4772	1	0	0	0	0	0	0			1	0	0	1	0	1.1732
1632	6	2016-04-12	0	62	66	80	0.904977	80	0	1	0	0	0	87.2669	67.488	0	0	1	0	0	1	0			0	0	1	1	0	1.02
1633	4	2014-07-14	1	63	64.4654	80	0.904977	80	0	1	0	0	0	90.9634	79.3362	0	0	0	0	0	0	1			0	0	0	1	0	1.11
1634	5	2016-04-13	0	58	65	79	0.893665	79	0	1	0	0	0	90.7578	75.8007	0	0	1	0	0	0	0			0	0	0	1	0	1.15
1635	4	2015-02-04	0	56	77	74	0.837104	74	0	1	0	0	0	76.1708	96.266	1	0	0	0	0	1	0			1	0	0	2	0	1.25
1636	6	2016-09-28	0	77	70	74	0.837104	74	0	1	0	0	0	70.5575	64.2951	0	0	1	0	0	0	0			0	0	0	2	0	1.44
1637	5	2016-02-03	0	64	54	73	0.825792	73	0	1	0	0	0	99.9538	69.6865	0	0	0	0	0	1	0		1	0	0	0	1	0	1.09
1638	4	2014-10-08	0	53	64	73	0.825792	73	0	1	0	0	0	101.332	87.0357	0	0	1	0	0	0	0			0	0	1	1	0	1.16
1639	5	2016-03-28	0	64	64.4654	70	0.791855	70	0	1	0	0	0	105.612	89.0591	0	1	0	0	0	1	0			0	0	0	1	0	1.15
1640	5	2016-11-21	1	77	168	69	0.780543	69	0	1	0	0	0	78.8641	192.083	1	0	0	0	0	1	0			0	0	0	2	0	1.11
1641	6	2014-09-10	0	61	62	69	0.780543	69	0	1	0	0	0	102.069	67.7166	0	0	1	0	0	0	1	3		0	0	0	1	0	1.1732
1642	5	2015-01-19	1	55	64.4654	69	0.780543	69	0	1	0	0	0	105.958	85.5792	0	0	1	0	0	1	1			0	0	0	1	0	1.27
1643	6	2014-06-09	0	43	62	67	0.757919	67	0	1	0	0	0	105.904	71.0235	0	0	0	0	0	0	0			0	0	1	1	0	1.07
1644	4	2016-10-21	0	44	75	67	0.757919	67	0	1	0	0	0	82.6704	93.0448	0	0	0	0	0	0	0			1	0	1	2	0	1.09
1645	4	2012-09-27	1	65	68	67	0.757919	67	0	1	0	0	0	83.1021	85.9799	0	0	0	0	0	0	0			0	0	0	2	0	1.26
1646	3	2016-01-06	0	37	55	67	0.757919	67	0	1	0	0	0	118.091	95.4336	0	0	0	0	0	1	0			1	0	0	1	0	1.69
1647	5	2015-04-24	1	75	55	66	0.746606	66	0	1	0	0	0	110.904	74.4375	0	0	0	0	0	0	0			0	0	0	1	0	1.57
1648	5	2016-09-23	1	66	50	66	0.746606	66	0	1	0	0	0	111.941	70.4736	0	0	0	0	0	0	0	2		0	0	0	1	0	1.19
1649	5	2014-11-07	0	64	71	66	0.746606	66	0	1	0	0	0	83.3717	86.3781	0	0	0	0	0	0	0			0	0	0	2	0	1.27
1650	3	2016-03-28	1	53	73	66	0.746606	66	0	1	0	0	0	88.3303	106.84	0	0	0	0	0	0	0			0	0	0	2	0	1.34
1651	3	2016-07-29	0	58	59	66	0.746606	66	0	1	0	0	0	119.794	103.177	0	0	0	0	0	0	1			0	0	0	1	0	1.31
1652	5	2015-10-21	1	38	64.4654	65	0.735294	65	0	1	0	0	0	112.978	88.9574	0	0	0	0	0	0	0			0	0	0	1	0	1.06
1653	5	2014-09-15	1	58	62	65	0.735294	65	0	1	0	0	0	113.122	86.043	0	0	0	0	0	0	0			0	0	0	1	0	1.1732
1654	6	2014-04-28	1	6	55	64	0.723982	64	0	1	0	0	0	113.345	71.7945	0	0	1	0	0	0	1	3		1	0	0	1	0	0.94
1655	5	2016-07-20	0	60	50	64	0.723982	64	0	1	0	0	0	116.741	74.6101	0	0	0	0	0	0	0			1	0	0	1	0	0.97
1656	5	2016-11-02	0	62	62	64	0.723982	64	0	1	0	0	0	117.039	93.4387	0	0	0	0	0	1	0		1	0	0	0	1	0	0.95
1657	4	2016-05-13	0	58	66	64	0.723982	64	0	1	0	0	0	120.495	109.856	0	0	0	0	0	0	0			0	0	0	1	0	1.1732
1658	4	2016-06-06	0	59	71	62	0.701357	62	0	1	0	0	0	92.3144	102.222	0	0	0	0	0	1	0			0	0	0	2	0	1.09
1659	4	2015-08-12	0	64	62	61	0.690045	61	0	1	0	0	0	125.43	103.087	0	0	1	0	0	1	0			0	0	0	1	0	1.4
1660	4	2016-02-11	0	5	64.4654	61	0.690045	61	0	1	0	0	0	127.381	112.64	0	0	1	0	0	1	0			0	0	0	1	0	1.09
1661	3	2016-04-13	0	60	48	61	0.690045	61	0	1	0	0	0	132.163	92.4008	0	0	1	0	0	0	0			0	0	0	1	0	1.25
1662	4	2015-10-19	1	78	80	60	0.678733	60	0	1	0	0	0	94.0321	111.418	0	0	0	0	0	1	0	2		0	0	0	2	0	2
1663	4	2015-01-05	0	71	65	60	0.678733	60	0	1	0	0	0	127.344	108.383	0	0	0	0	0	0	0			0	0	0	1	0	1.07
1664	4	2016-03-23	1	65	59	60	0.678733	60	0	1	0	0	0	129.329	103.561	0	0	0	0	0	1	0			0	0	0	1	0	1.26
1665	3	2013-04-17	0	68	53	59	0.667421	59	0	1	0	0	0	136.755	104.433	0	0	0	0	0	0	0			1	0	0	1	0	1.1732
1666	2	2016-04-13	1	24	76	59	0.667421	59	0	1	0	0	0	107.188	141.702	0	0	0	0	0	1	0		1	0	0	0	2	0	1.1732
1667	5	2014-10-20	0	63	76	58	0.656109	58	0	1	0	0	0	95.4344	99.0663	0	0	1	0	0	0	0			0	0	0	2	0	1.1732
1668	5	2015-10-12	0	69	72	58	0.656109	58	0	1	0	0	0	97.3168	101.881	0	0	1	0	0	1	0		4	0	0	0	2	0	2.03
1669	6	2014-02-19	1	66	51	57	0.644796	57	0	1	0	0	0	127.781	69.1928	0	0	1	0	0	1	1	3		0	0	0	1	0	0.89
1670	4	2012-11-05	0	51	82	57	0.644796	57	0	1	0	0	0	102.257	130.505	0	0	0	0	0	0	0			0	0	0	2	0	1.14
1671	5	2016-08-24	0	64	50	54	0.61086	54	0	1	0	0	0	142.299	89.0871	0	0	0	0	0	1	1			0	0	0	1	0	1.62
1672	3	2014-02-19	1	64	60	53	0.599548	53	0	1	0	0	0	151.413	124.42	1	0	0	0	0	1	0			1	0	0	1	0	0.86
1673	4	2015-04-24	1	67	59	53	0.599548	53	0	1	0	0	0	148.452	115.296	0	0	0	0	0	1	0			0	0	0	1	0	1.1732
1674	5	2016-07-27	0	63	68	50	0.565611	50	0	1	0	0	0	115.187	110.454	0	0	1	0	0	1	1	4		0	0	0	2	0	1.27
1675	4	2016-01-11	0	77	62	50	0.565611	50	0	1	0	0	0	160.248	132.19	0	0	0	0	0	0	0		1	1	0	0	1	0	0.98
1676	3	2015-01-21	0	74	75	49	0.554299	49	0	1	0	0	0	124.465	147.566	0	0	0	0	0	1	0			0	0	0	2	0	1.1732
1677	5	2015-06-12	0	74	54	48	0.542986	48	0	1	0	0	0	162.476	106.837	0	0	0	0	0	0	0			0	0	0	1	0	0.72
1678	4	2016-01-18	1	69	56	46	0.520362	46	0	1	0	0	0	172.641	120.799	0	0	0	0	0	0	0			0	0	0	1	0	1.41
1679	6	2013-03-20	0	79	50	39	0.441176	39	0	1	0	0	0	199.78	104.385	0	1	0	0	0	0	0			0	0	0	1	0	1.1732
1680	2	2015-05-06	1	47	77	38	0.429864	38	0	1	0	0	0	179.372	225.443	0	0	0	0	0	0	0			0	0	0	2	0	1.38
1681	7	2015-06-19	0	67	75	116	1.31222	115	-1	0.991379	0	0	0	41.0085	37.6343	0	0	1	0	0	0	1	3		0	0	0	2	0	0.52
1682	6	2015-10-19	0	62	74	116	1.31222	115	-1	0.991379	0	0	0	41.4787	40.195	0	0	1	0	0	1	0			1	0	1	2	0	1.35
1683	4	2010-09-25	1	75	56	111	1.25566	110	-1	0.990991	0	0	0	64.2843	54.8857	0	0	0	0	0	0	0			0	0	0	1	0	1.57
1684	5	2015-06-17	0	57	89	110	1.24434	109	-1	0.990909	0	0	0	46.6043	66.9926	0	0	1	0	0	0	0			0	0	0	2	0	0.9
1685	4	2014-09-29	0	62	75	110	1.24434	109	-1	0.990909	0	0	0	48.0724	62.5699	0	0	0	0	0	0	0			0	0	0	2	0	1.1732
1686	4	2012-12-24	1	28	76	104	1.17647	103	-1	0.990385	0	0	0	51.0887	66.2973	0	0	1	0	0	1	0	2		0	0	0	2	0	0.97
1687	6	2016-10-09	0	43	42	99	1.11991	98	-1	0.989899	0	0	0	68.7378	36.0432	0	0	1	0	0	1	0		2	0	0	1	1	0	1.1
1688	4	2014-03-31	0	51	60	95	1.07466	94	-1	0.989474	0	0	0	74.7396	62.6066	0	0	1	0	0	1	1	3		0	0	0	1	0	1.59
1689	6	2015-11-09	0	75	61	94	1.06335	93	-1	0.989362	0	0	0	72.8601	54.6963	0	0	0	0	0	1	0			0	0	0	1	0	0.67
1690	5	2015-03-04	1	7	71	94	1.06335	93	-1	0.989362	0	0	0	55.7749	62.1235	0	0	1	0	0	0	0			0	0	0	2	0	1.06
1691	5	2016-11-18	1	67	73	93	1.05204	92	-1	0.989247	0	0	0	55.3944	59.5913	0	0	0	0	0	1	0	2		0	0	0	2	0	1.89
1692	5	2012-02-08	0	68	60	91	1.02941	90	-1	0.989011	0	0	0	76.2852	57.9442	0	0	0	0	0	0	0		1	1	0	0	1	0	0.99
1693	4	2013-01-17	0	46	75	90	1.0181	89	-1	0.988889	0	0	0	60.596	76.4624	0	0	1	0	0	1	0			0	0	0	2	0	1.72
1694	5	2013-05-31	0	66	64.4654	89	1.00679	88	-1	0.988764	0	0	0	79.3708	67.7124	0	0	0	0	0	0	0		2	0	0	0	1	0	0.99
1695	6	2016-08-08	0	60	49	88	0.995475	87	-1	0.988636	0	0	0	78.5722	46.7784	0	0	0	0	0	0	0			0	0	1	1	0	1.1732
1696	3	2015-09-18	1	7	88	86	0.972851	85	-1	0.988372	0	0	0	65.1719	99.1901	0	0	1	0	0	1	1			0	0	0	2	0	1.31
1697	4	2016-07-27	0	63	59	84	0.950226	83	-1	0.988095	0	0	0	86.2235	69.8565	1	0	0	0	0	0	0			0	0	0	1	0	1.1732
1698	3	2016-12-07	0	71	70	83	0.938914	82	-1	0.987952	0	0	0	68.0738	82.2787	0	0	0	0	0	1	0			0	0	0	2	0	1.1732
1699	6	2014-03-03	1	44	67	81	0.91629	80	-1	0.987654	0	0	0	64.1396	59.005	1	0	1	0	0	1	0	2		0	0	0	2	0	1.14
1700	6	2016-09-14	1	67	70	81	0.91629	80	-1	0.987654	0	0	0	63.4296	58.0049	0	0	0	0	0	0	1			0	0	0	2	0	1.24
1701	6	2016-10-28	1	65	66	81	0.91629	80	-1	0.987654	0	0	0	85.5786	64.7499	0	0	0	0	0	0	0			0	0	1	1	0	1.58
1702	5	2014-01-06	0	62	59	81	0.91629	80	-1	0.987654	0	0	0	88.4549	67.9992	0	0	0	0	0	1	0			0	0	0	1	0	1.48
1703	5	2014-10-20	0	72	74	78	0.882353	77	-1	0.987179	0	0	0	68.4136	74.634	0	0	0	0	0	1	1			1	0	0	2	0	0.97
1704	3	2016-04-20	1	48	82	78	0.882353	77	-1	0.987179	0	0	0	72.199	99.2226	0	0	1	0	0	1	0		1	1	0	0	2	0	0.95
1705	4	2016-09-07	0	62	50	77	0.871041	76	-1	0.987013	0	0	0	95.2234	64.3202	0	0	1	0	0	1	0			0	0	0	1	0	1.22
1706	3	2016-06-22	0	59	68	77	0.871041	76	-1	0.987013	0	0	0	75.4773	89.532	0	0	0	0	0	1	0			0	0	0	2	0	0.83
1707	5	2016-09-30	0	76	50	76	0.859729	75	-1	0.986842	0	0	0	95.2436	61.5239	1	0	1	0	0	0	0			0	0	0	1	0	1.44
1708	5	2016-06-17	0	42	49	76	0.859729	75	-1	0.986842	0	0	0	95.843	61.831	0	0	0	0	0	1	0	2		1	0	1	1	0	0.82
1709	4	2016-03-16	0	69	58	76	0.859729	75	-1	0.986842	0	0	0	96.6971	75.6676	0	0	0	0	0	1	0			0	0	0	1	0	0.83
1710	5	2016-11-30	0	61	68	75	0.848416	74	-1	0.986667	0	0	0	70.8916	68.3395	0	0	0	0	0	1	0			0	0	1	2	0	1.33
1711	5	2015-06-03	0	63	58	75	0.848416	74	-1	0.986667	0	0	0	96.4614	71.5441	0	0	0	0	0	0	0			1	0	0	1	0	0.79
1712	5	2016-03-07	0	64	70	70	0.791855	69	-1	0.985714	0	0	0	77.0725	76.7469	0	0	1	0	0	0	0			1	0	0	2	0	1.77
1713	5	2014-08-11	0	25	64.4654	70	0.791855	69	-1	0.985714	0	0	0	104.13	84.0655	0	0	1	0	0	0	0			1	0	0	1	0	1.1732
1714	6	2016-03-11	1	6	50	69	0.780543	68	-1	0.985507	0	0	0	102.061	54.5809	0	0	0	0	0	0	1	4		0	0	0	1	0	0.3
1715	4	2016-12-23	1	55	62	69	0.780543	68	-1	0.985507	0	0	0	108.99	91.6701	0	0	0	0	0	1	0			0	0	0	1	0	0.94
1716	4	2017-03-08	0	70	64.4654	67	0.757919	66	-1	0.985075	0	0	0	83.0668	81.3869	0	0	0	0	0	0	0			1	0	0	2	0	1.8
1717	5	2015-08-03	0	62	61	66	0.746606	65	-1	0.984848	0	0	0	110.122	79.8501	0	0	0	0	0	1	0			0	0	0	1	0	1.1732
1718	5	2015-03-20	1	74	64.4654	66	0.746606	65	-1	0.984848	0	0	0	112.558	92.919	0	0	1	0	0	1	0			0	0	1	1	0	1.7
1719	4	2017-01-11	0	69	73	65	0.735294	64	-1	0.984615	0	0	0	87.6366	101.041	0	0	0	0	0	1	0	2		0	0	1	2	0	1.02
1720	4	2015-11-13	1	22	68	64	0.723982	63	-1	0.984375	0	0	0	87.7842	90.633	0	0	0	0	0	0	1	3		0	0	1	2	0	1.47
1721	4	2015-05-08	0	66	81	64	0.723982	63	-1	0.984375	0	0	0	88.5962	111.372	0	0	1	0	0	0	0			1	0	0	2	0	1.27
1722	3	2016-11-14	1	66	70	64	0.723982	63	-1	0.984375	0	0	0	91.2553	104.863	0	0	0	0	0	0	0	2		0	0	0	2	0	1.02
1723	5	2015-07-27	0	68	61	61	0.690045	60	-1	0.983607	0	0	0	122.266	91.9723	0	0	1	0	0	0	0			0	0	0	1	0	0.79
1724	5	2016-11-25	0	77	61	58	0.656109	57	-1	0.982759	0	0	0	129.054	94.9889	0	0	0	0	0	0	0			0	0	0	1	0	0.97
1725	3	2015-12-16	1	64	78	58	0.656109	57	-1	0.982759	0	0	0	102.163	128.705	0	0	0	0	0	1	0	2		0	0	0	2	0	1.23
1726	3	2014-01-08	1	7	64.4654	58	0.656109	57	-1	0.982759	0	0	0	139.65	129.585	0	0	1	0	0	0	0			1	0	0	1	0	1.22
1727	4	2016-05-25	1	76	64	57	0.644796	56	-1	0.982456	0	0	0	136.486	116.263	0	0	1	0	0	0	0			0	0	0	1	0	0.87
1728	4	2016-02-24	0	56	59	55	0.622172	54	-1	0.981818	0	0	0	141.16	108.299	0	0	0	0	0	0	0			1	0	0	1	0	0.82
1729	5	2014-12-24	0	66	62	54	0.61086	53	-1	0.981481	0	0	0	142.539	111.186	0	0		0	0	1	0	2		0	0	0	1	0	1.34
1730	6	2016-07-08	0	66	43	53	0.599548	52	-1	0.981132	0	0	0	140.041	65.5803	1	0	0	0	0	0	0			0	0	0	1	0	1.68
1731	5	2015-11-02	0	62	52	53	0.599548	52	-1	0.981132	0	0	0	142.871	87.6925	1	0	1	0	0	0	0			0	0	0	1	0	1.1732
1732	5	2014-11-05	1	68	54	53	0.599548	52	-1	0.981132	0	0	0	144.125	94.6056	0	0	0	0	0	0	0	2		0	0	0	1	0	1.1
1733	5	2014-12-29	0	63	50	52	0.588235	51	-1	0.980769	0	0	0	145.94	85.6566	0	0	1	0	0	0	0			1	0	0	1	0	0.9
1734	5	2016-09-14	0	72	55	51	0.576923	50	-1	0.980392	0	0	0	151.781	103.176	1	0	1	0	0	0	0			0	0	0	1	0	0.87
1735	4	2014-05-14	0	77	49	49	0.554299	48	-1	0.979592	0	0	0	164.19	106.921	0	0	0	0	0	1	0			0	0	0	1	0	1.35
1736	5	2016-01-04	0	68	64.4654	48	0.542986	47	-1	0.979167	0	0	0	162.496	127.606	0	0	0	0	0	1	0	2		0	0	0	1	0	1.1732
1737	4	2014-12-24	1	66	64.4654	41	0.463801	40	-1	0.97561	0	0	0	203.363	172.193	0	0	0	0	0	1	0			1	0	0	1	0	1.1732
1738	5	2015-09-07	1	56	65	130	1.47059	128	-2	0.984615	0	0	0	50.712	44.6154	0	0	0	0	0	0	0			0	0	0	1	0	0.75
1739	3	2017-07-02	1	56	78	107	1.21041	105	-2	0.981308	0	0	0	50.0084	68.3478	0	0	0	0	0	1	0			1	0	0	2	0	1.33
1740	6	2015-03-18	0	35	54	105	1.18778	103	-2	0.980952	0	0	0	64.1464	43.4215	0	0	1	0	0	0	0			1	0	0	1	0	1.22
1741	4	2016-12-23	1	45	70	104	1.17647	102	-2	0.980769	0	0	0	50.9695	60.6323	0	0	1	0	0	0	0			1	0	0	2	0	1.5
1742	3	2016-07-06	0	63	83	103	1.16516	101	-2	0.980583	0	0	0	52.9665	78.2676	0	0	1	0	0	0	0			0	0	0	2	0	1.17
1743	6	2016-04-15	0	71	62	101	1.14253	99	-2	0.980198	0	0	0	65.959	47.1518	0	0	1	0	0	1	0		1	1	0	1	1	0	1.1732
1744	6	2015-04-27	1	58	74	100	1.13122	98	-2	0.98	0	0	0	49.6026	48.8817	0	0	1	0	0	1	0			0	0	0	2	0	1.22
1745	6	2014-01-08	0	52	56	100	1.13122	98	-2	0.98	0	0	0	67.0954	44.4632	0	0	0	0	0	1	0			0	0	0	1	0	0.77
1746	3	2016-05-01	0	74	74	100	1.13122	98	-2	0.98	0	0	0	54.8918	72.1577	0	0	0	0	0	1	0			1	0	0	2	0	1.1732
1747	5	2016-01-25	1	72	63	96	1.08597	94	-2	0.979167	0	0	0	73.3894	63.5842	0	0	0	0	0	0	0			0	0	0	1	0	1.21
1748	2	2016-06-03	0	58	98	96	1.08597	94	-2	0.979167	0	0	0	60.6692	110.934	0	0	0	0	0	0	0			0	0	0	2	0	1.1732
1749	6	2016-06-13	0	57	64	95	1.07466	93	-2	0.978947	0	0	0	72.1321	57.4099	0	0	0	0	0	0	0			0	0	0	1	0	0.76
1750	6	2014-10-22	0	53	58	93	1.05204	91	-2	0.978495	0	0	0	72.5542	47.9251	0	0	1	0	0	0	0			1	0	0	1	0	0.75
1751	4	2015-07-20	1	44	69	93	1.05204	91	-2	0.978495	0	0	0	57.0141	63.2183	0	0	0	0	0	0	0			0	0	0	2	0	1.89
1752	5	2015-06-10	0	56	70	92	1.04072	90	-2	0.978261	0	0	0	55.8399	56.5757	0	0	1	0	0	0	0			0	0	0	2	0	1.22
1753	5	2013-07-22	1	53	75	90	1.0181	88	-2	0.977778	0	0	0	57.0399	60.7439	0	1	1	0	0	0	0			1	0	0	2	0	1.1732
1754	4	2015-07-03	0	37	71	90	1.0181	88	-2	0.977778	0	0	0	59.844	69.6641	0	0	0	0	0	1	0			0	0	0	2	0	1.1732
1755	3	2017-03-06	0	59	64.4654	90	1.0181	88	-2	0.977778	0	0	0	62.5685	71.4056	0	0	0	0	0	1	0			0	0	0	2	0	1.08
1756	5	2014-11-21	1	46	78	89	1.00679	87	-2	0.977528	0	0	0	58.9374	69.8548	0	0	1	0	0	1	0			1	0	0	2	0	1.08
1757	6	2016-12-14	1	74	70	87	0.984163	85	-2	0.977011	0	0	0	58.323	53.5421	1	0	1	0	0	0	0			0	0	0	2	0	1.35
1758	6	2015-01-19	1	70	60	86	0.972851	84	-2	0.976744	0	0	0	80.7474	58.8465	0	0	0	0	0	0	0			1	0	0	1	0	0.91
1759	7	2016-11-11	1	43	66	85	0.961538	83	-2	0.976471	0	0	0	78.4963	49.9625	0	0	0	0	0	0	0			0	0	0	1	0	0.97
1760	4	2016-12-23	1	67	71	85	0.961538	83	-2	0.976471	0	0	0	64.7422	76.6924	0	0	1	1	0	0	0		1	1	0	0	2	0	1.22
1761	5	2014-03-17	1	66	60	83	0.938914	81	-2	0.975904	0	0	0	85.7698	66.7316	0	0	0	0	0	1	0			0	0	0	1	0	1.2
1762	4	2015-04-17	1	67	66	83	0.938914	81	-2	0.975904	0	0	0	87.7855	80.2469	0	0	0	0	0	0	0		1	1	0	0	1	0	1.08
1763	3	2015-07-15	0	72	54	83	0.938914	81	-2	0.975904	0	0	0	93.9807	78.8312	0	0	0	0	0	0	0			0	0	0	1	0	1.03
1764	5	2016-05-23	0	68	51	81	0.91629	79	-2	0.975309	0	0	0	87.4807	56.0066	0	0	0	0	0	1	0			0	0	0	1	0	0.98
1765	5	2015-12-21	1	73	74	81	0.91629	79	-2	0.975309	0	0	0	65.0608	69.8036	0	0	0	1	0	1	0	2		1	0	1	2	0	0.99
1766	4	2017-03-22	0	62	64.4654	79	0.893665	77	-2	0.974684	0	0	0	68.3796	67.9138	0	0	0	0	0	0	0			0	0	0	2	0	1.1732
1767	4	2015-01-21	1	58	70	78	0.882353	76	-2	0.974359	0	0	0	71.6571	82.9471	1	0	0	0	0	1	0			0	0	0	2	0	1.1732
1768	7	2017-02-10	0	68	64	78	0.882353	76	-2	0.974359	0	0	0	87.461	56.608	0	0	0	0	0	1	0	2		0	0	0	1	0	1.08
1769	3	2016-08-19	1	72	78	78	0.882353	76	-2	0.974359	0	0	0	73.0242	97.1988	0	0	0	0	0	1	0			0	0	0	2	0	1.07
1770	3	2016-01-20	0	64	63	75	0.848416	73	-2	0.973333	0	0	0	102.907	95.9055	0	0	0	0	0	0	0			0	0	0	1	0	0.87
1771	6	2015-10-12	0	74	55	74	0.837104	72	-2	0.972973	0	0	0	95.883	62.1676	0	0	0	0	0	1	0			0	0	0	1	0	1.44
1772	5	2015-08-17	1	67	60	74	0.837104	72	-2	0.972973	0	0	0	96.4024	69.6983	0	0	1	0	0	1	1	4		1	0	1	1	0	1.04
1773	4	2014-11-12	0	64	53	74	0.837104	72	-2	0.972973	0	0	0	101.111	74.4512	0	0	1	0	0	1	0		1	1	0	0	1	0	1.1732
1774	4	2016-01-25	0	60	64	74	0.837104	72	-2	0.972973	0	0	0	102.75	94.3777	0	0	0	0	0	1	0			0	0	0	1	0	1.24
1775	5	2011-04-01	1	75	55	73	0.825792	71	-2	0.972603	0	0	0	98.3241	66.0401	1	0	1	0	0	1	1			0	0	0	1	0	1.1732
1776	6	2015-01-06	0	40	62	73	0.825792	71	-2	0.972603	0	0	0	97.2211	70.357	0	0	0	0	0	0	0			0	0	0	1	0	1.1732
1777	6	2017-02-15	0	34	61	71	0.803167	69	-2	0.971831	0	0	0	100.688	72.2877	0	0	0	0	0	1	0			0	0	0	1	0	1.1732
1778	3	2013-01-09	0	58	71	71	0.803167	69	-2	0.971831	0	0	0	81.0101	96.0465	0	0	1	0	0	1	0			1	0	0	2	0	1.24
1779	5	2016-02-19	0	66	64.4654	70	0.791855	68	-2	0.971429	0	0	0	104.247	84.4775	0	0	1	0	0	0	1	3		0	0	0	1	0	2.12
1780	3	2011-07-06	0	47	77.6	70	0.791855	68	-2	0.971429	0	0	0	84.1644	112.132	0	0	1	0	0	0	0	2		0	0	0	2	0	1.81
1781	5	2014-07-30	0	69	158	69	0.780543	67	-2	0.971014	0	0	0	79.0866	182.771	0	0	0	0	0	1	0	2		0	0	0	2	0	0.9
1782	6	2013-08-09	1	7	64.4654	68	0.769231	66	-2	0.970588	0	0	0	105.752	79.4554	0	0	1	0	0	1	0		1	1	0	0	1	0	1.66
1783	5	2015-08-19	0	68	50	68	0.769231	66	-2	0.970588	0	0	0	106.14	62.7839	0	0	0	0	0	1	0			1	0	1	1	0	1.2
1784	5	2016-08-15	0	74	60	67	0.757919	65	-2	0.970149	0	0	0	110.51	84.8485	0	1	0	0	0	0	0			0	0	0	1	0	1.1732
1785	6	2017-03-15	0	62	64.4654	66	0.746606	64	-2	0.969697	0	0	0	81.0997	69.0558	0	1	0	0	0	1	0			0	0	0	2	0	1.1732
1786	4	2016-06-01	0	64	56	65	0.735294	63	-2	0.969231	0	0	0	116.663	87.6304	0	0	1	0	0	1	0		1	0	0	0	1	0	1.1732
1787	6	2011-10-18	1	78	57.4	64	0.723982	62	-2	0.96875	0	0	0	112.896	73.3616	0	0	1	0	0	0	0			0	0	0	1	0	1.1732
1788	6	2014-10-13	0	47	60	64	0.723982	62	-2	0.96875	0	0	0	113.29	78.1226	0	0	0	0	0	1	0			0	0	0	1	0	1.24
1789	5	2017-03-31	1	40	64.4654	64	0.723982	62	-2	0.96875	0	0	0	84.996	75.3668	0	0	0	0	0	0	0		1	1	0	0	2	0	1.1732
1790	5	2016-10-31	0	62	83	64	0.723982	62	-2	0.96875	0	0	0	85.4216	99.2827	0	0	1	0	0	0	1	3		0	0	0	2	0	1.59
1791	6	2016-07-20	0	37	64.4654	63	0.71267	61	-2	0.968254	0	0	0	114.482	81.7617	0	1	1	0	0	0	0		1	0	0	0	1	0	1.65
1792	6	2012-11-12	1	69	64.4654	63	0.71267	61	-2	0.968254	0	0	0	114.483	81.7686	0	0	0	0	0	0	0			1	0	0	1	0	0.91
1793	6	2016-06-01	0	67	58	63	0.71267	61	-2	0.968254	0	0	0	115.531	77.284	0	0	1	0	0	1	1	3		0	0	0	1	0	0.86
1794	7	2015-03-09	0	49	64.4654	62	0.701357	60	-2	0.967742	0	0	0	114.326	73.2664	0	0	0	0	0	0	0			0	0	0	1	0	1.26
1795	5	2016-05-30	1	73	62	60	0.678733	58	-2	0.966667	0	0	0	125.427	97.6207	0	0	0	0	0	0	0			1	0	0	1	0	1.05
1796	5	2016-05-16	1	59	68	60	0.678733	58	-2	0.966667	0	0	0	93.5974	93.0686	0	0	1	0	0	1	0			0	0	0	2	0	0.81
1797	4	2016-01-20	1	62	67	60	0.678733	58	-2	0.966667	0	0	0	130.854	121.776	0	0	0	0	0	0	0			1	0	0	1	0	1.1732
1798	3	2016-11-25	0	68	78	60	0.678733	58	-2	0.966667	0	0	0	97.7846	122.887	0	0	0	0	0	0	0			1	0	0	2	0	0.93
1799	6	2015-04-13	0	7	62	58	0.656109	56	-2	0.965517	0	0	0	125.357	83.1232	0	0	0	0	0	0	0			0	0	0	1	0	0.93
1800	5	2015-05-18	0	65	57	58	0.656109	56	-2	0.965517	0	0	0	130.183	92.1254	0	0	1	0	0	1	1	4		0	0	0	1	0	1.12
1801	5	2014-01-27	1	6	64	58	0.656109	56	-2	0.965517	0	0	0	130.614	104.835	0	0	1	0	0	1	0		2	1	0	0	1	0	1.23
1802	4	2015-10-14	0	68	62	56	0.633484	54	-2	0.964286	0	0	0	139.301	114.638	0	0	0	0	0	1	0	2		1	0	0	1	0	0.8
1803	6	2015-12-18	1	68	64.4654	55	0.622172	53	-2	0.963636	0	0	0	134.551	96.1816	0	0	0	0	0	0	0		1	0	0	0	1	0	1.11
1804	5	2014-08-06	1	44	52	51	0.576923	49	-2	0.960784	0	0	0	148.158	87.7257	0	0	0	0	0	0	0	1		0	0	0	1	0	1.1732
1805	4	2014-09-19	0	71	60	50	0.565611	48	-2	0.96	0	0	0	158.714	124.123	1	0	1	0	0	0	0			0	0	0	1	0	0.78
1806	5	2016-02-26	1	67	62	48	0.542986	46	-2	0.958333	0	0	0	159.98	114.792	0	0	0	0	0	1	0			0	0	0	1	0	0.77
1807	4	2015-12-21	0	36	64.4654	46	0.520362	44	-2	0.956522	0	0	0	175.887	147.989	0	0	1	0	0	1	0		1	0	0	0	1	0	1.45
1808	6	2016-04-11	1	67	59	233	2.63575	230	-3	0.987124	0	0	0	25.172	19.6095	0	0	0	0	0	0	0		1	1	0	0	1	0	1.12
1809	7	2016-07-13	1	70	72	153	1.73077	150	-3	0.980392	0	0	0	29.8945	28.0741	0	0	0	0	0	1	0			1	0	0	2	0	0.71
1810	6	2016-11-02	0	50	80	148	1.67421	145	-3	0.97973	0	0	0	31.3076	34.0184	0	0	0	0	0	0	0			0	0	0	2	0	1.1732
1811	5	2016-04-07	0	42	64.4654	134	1.51584	131	-3	0.977612	0	0	0	49.8792	46.3762	0	0	1	0	0	1	0			0	0	0	1	0	1.3
1812	4	2016-03-30	1	63	84	118	1.33484	115	-3	0.974576	0	0	0	43.9591	63.6867	0	0	0	0	0	1	0			0	0	0	2	0	1.29
1813	6	2014-01-13	1	46	89	115	1.3009	112	-3	0.973913	0	0	0	42.6033	53.859	0	0	0	0	0	0	0			0	0	1	2	0	0.89
1814	4	2015-07-13	0	63	80	102	1.15385	99	-3	0.970588	0	0	0	51.709	68.8856	0	0	0	0	0	1	0			0	0	0	2	0	1.6
1815	6	2015-01-09	0	61	56	99	1.11991	96	-3	0.969697	0	0	0	68.2447	46.2823	0	1	0	0	0	0	0		1	1	0	0	1	0	1.21
1816	4	2017-03-29	0	45	75	99	1.11991	96	-3	0.969697	0	0	0	54.4095	69.9748	0	0	0	0	0	0	0			0	0	0	2	0	0.98
1817	6	2012-12-03	1	59	79.6	98	1.1086	95	-3	0.969388	0	0	0	51.283	56.7798	0	0	0	0	0	1	0			1	0	0	2	0	1.54
1818	6	2015-03-18	0	45	64	97	1.09729	94	-3	0.969072	0	0	0	70.0123	54.5728	0	0	1	0	0	1	0			0	0	0	1	0	0.85
1819	5	2015-12-04	1	71	70	97	1.09729	94	-3	0.969072	0	0	0	52.3946	52.9888	0	0	1	0	0	1	0			0	0	0	2	0	0.98
1820	4	2012-12-13	1	23	81	97	1.09729	94	-3	0.969072	0	0	0	55.8169	77.5679	0	0	0	0	0	1	0			0	0	0	2	0	1.11
1821	6	2014-12-26	0	35	58	94	1.06335	91	-3	0.968085	0	0	0	71.9202	48.4364	0	0	1	0	0	1	0			0	0	0	1	0	1.13
1822	6	2016-03-21	0	57	70	93	1.05204	90	-3	0.967742	0	0	0	53.855	49.2743	0	0	1	0	0	1	0			0	0	0	2	0	0.92
1823	5	2015-11-02	1	64	68	93	1.05204	90	-3	0.967742	0	0	0	56.0557	58.424	0	1	1	0	0	1	1			0	0	0	2	0	1.41
1824	5	2016-11-07	1	62	66	92	1.04072	89	-3	0.967391	0	0	0	76.17	66.2528	0	0	0	0	0	1	0		1	0	0	0	1	0	0.89
1825	5	2016-10-18	0	43	65	91	1.02941	88	-3	0.967033	0	0	0	78.0835	69.2793	0	0	0	0	0	0	0			0	0	0	1	0	1.19
1826	5	2015-11-09	1	78	70	88	0.995475	85	-3	0.965909	0	0	0	59.0651	60.496	0	0	0	0	0	0	0			0	0	0	2	0	1.1
1827	4	2013-04-08	0	58	62	88	0.995475	85	-3	0.965909	0	0	0	81.9138	70.6737	0	0	1	0	0	1	1			0	0	0	1	0	1.1732
1828	6	2016-01-25	1	63	68	87	0.984163	84	-3	0.965517	0	0	0	58.936	55.1343	0	0	0	0	0	1	0			0	0	0	2	0	1.16
1829	5	2016-07-29	1	68	66	86	0.972851	83	-3	0.965116	0	0	0	82.9794	73.1752	0	0	0	0	0	0	0			1	0	0	1	0	1.1732
1830	4	2016-09-23	0	41	76	85	0.961538	82	-3	0.964706	0	0	0	64.2232	80.13	1	1	0	0	0	1	0	2		0	0	0	2	0	1.65
1831	5	2015-01-09	1	62	74	84	0.950226	81	-3	0.964286	0	0	0	63.0687	70.512	0	0	1	0	0	1	0			0	0	1	2	0	2
1832	6	2015-09-30	0	61	50	82	0.927602	79	-3	0.963415	0	0	0	84.2574	48.0651	0	0	0	0	0	0	0		1	0	0	0	1	0	1.1732
1833	5	2012-09-27	1	69	76	82	0.927602	79	-3	0.963415	0	0	0	64.6691	73.3493	0	0	0	0	0	1	0			0	0	0	2	0	1.1732
1834	3	2015-07-15	0	72	79	82	0.927602	79	-3	0.963415	0	0	0	70.1218	97.4606	0	0	0	0	0	1	0			0	0	0	2	0	1.2
1835	5	2017-03-29	1	62	64.4654	81	0.91629	78	-3	0.962963	0	0	0	65.3718	62.0977	0	0	0	0	0	1	0			0	0	0	2	0	1.1732
1836	6	2015-05-25	0	68	54	78	0.882353	75	-3	0.961538	0	0	0	89.4695	55.3012	0	0	0	0	0	0	0	2		1	0	0	1	0	0.96
1837	3	2015-11-16	0	74	82	78	0.882353	75	-3	0.961538	0	0	0	71.9917	98.4471	0	0	0	0	0	0	0			0	0	0	2	0	1.7
1838	6	2016-06-15	1	63	74	77	0.871041	74	-3	0.961039	0	0	0	67.7275	67.1208	1	0	1	0	0	1	1	3		0	0	0	2	0	1.34
1839	5	2014-11-14	1	59	82	77	0.871041	74	-3	0.961039	0	0	0	69.0046	81.5173	0	0	0	0	0	1	0			0	0	0	2	0	1.46
1840	4	2016-12-23	1	64	73	77	0.871041	74	-3	0.961039	0	0	0	70.4203	78.8482	0	0	1	0	0	0	0			1	0	0	2	0	1.27
1841	3	2015-04-01	0	58	73	77	0.871041	74	-3	0.961039	0	0	0	74.155	92.2579	0	0	0	0	0	0	0		2	0	0	0	2	0	0.91
1842	2	2014-11-05	1	66	64.4654	77	0.871041	74	-3	0.961039	0	0	0	108.729	112.18	0	1	1	0	0	1	0			0	0	0	1	0	1.59
1843	6	2015-12-28	1	55	68	76	0.859729	73	-3	0.960526	0	0	0	68.8859	63.1169	0	0	1	0	0	1	0			0	0	0	2	0	1.01
1844	4	2014-03-11	0	6	64	76	0.859729	73	-3	0.960526	0	0	0	99.5579	91.6901	0	0	0	0	0	0	0			0	0	0	1	0	0.96
1845	3	2015-07-03	0	62	82	76	0.859729	73	-3	0.960526	0	0	0	75.4843	105.687	0	0	1	0	0	1	0			0	0	1	2	0	0.94
1846	5	2016-04-11	0	64	66	73	0.825792	70	-3	0.958904	0	0	0	100.598	87.3591	1	1	1	0	0	0	0		1	0	0	0	1	0	0.99
1847	4	2016-04-27	1	64	83	73	0.825792	70	-3	0.958904	0	0	0	75.5153	97.4257	0	0	0	0	0	1	0	2		0	0	0	2	0	1.22
1848	6	2012-07-09	1	75	49	72	0.81448	69	-3	0.958333	0	0	0	97.7987	53.3186	0	0	0	0	0	0	0			0	0	0	1	0	1.1732
1849	4	2015-06-24	0	63	64	72	0.81448	69	-3	0.958333	0	0	0	102.756	87.6166	0	0	0	0	0	1	0			0	0	0	1	0	1.04
1850	4	2016-10-09	0	46	71	70	0.791855	67	-3	0.957143	0	0	0	79.0305	86.0214	0	0	0	0	0	1	1			0	0	1	2	0	1.39
1851	3	2016-02-19	0	67	63	69	0.780543	66	-3	0.956522	0	0	0	113.439	104.558	0	0	1	0	0	1	0		1	0	0	0	1	0	0.96
1852	4	2016-02-29	0	59	79	68	0.769231	65	-3	0.955882	0	0	0	81.5428	97.7684	0	0	0	0	0	0	1	3		0	0	0	2	0	1.04
1853	4	2016-08-24	1	59	76	68	0.769231	65	-3	0.955882	0	0	0	81.7771	95.0271	0	0	0	0	0	1	0		1	0	0	0	2	0	2.51
1854	3	2013-04-22	0	76	73	68	0.769231	65	-3	0.955882	0	0	0	87.1436	108.904	0	0	0	0	0	1	0			0	0	0	2	0	1.08
1855	5	2017-01-16	1	63	61	66	0.746606	63	-3	0.954545	0	0	0	111.994	86.1457	0	0	0	0	0	0	0			0	0	0	1	0	1.21
1856	3	2015-06-15	0	63	71	66	0.746606	63	-3	0.954545	0	0	0	89.3856	106.94	0	0	1	0	0	1	0	1		0	0	0	2	0	1.08
1857	3	2014-12-15	1	61	85	65	0.735294	62	-3	0.953846	0	0	0	92.6119	135.134	0	0	1	0	0	0	0			0	0	0	2	0	1.34
1858	7	2017-01-18	1	66	61	64	0.723982	61	-3	0.953125	0	0	0	110.494	68.3668	0	0	0	0	0	1	0			0	0	0	1	0	0.98
1859	4	2015-08-04	0	43	55	64	0.723982	61	-3	0.953125	0	0	0	120.448	91.44	0	0	0	0	0	1	0			0	0	0	1	0	0.96
1860	5	2015-03-09	0	55	62	63	0.71267	60	-3	0.952381	0	0	0	118.851	93.889	0	0	0	0	0	0	0			0	0	0	1	0	0.74
1861	4	2015-12-21	1	66	70	63	0.71267	60	-3	0.952381	0	0	0	89.6688	95.793	0	0	0	0	0	1	0			0	0	0	2	0	2.1
1862	4	2013-06-07	1	8	50	63	0.71267	60	-3	0.952381	0	0	0	122.073	83.2107	0	0	0	0	0	1	0			0	0	0	1	0	1.1732
1863	5	2014-05-22	0	67	74	62	0.701357	59	-3	0.951613	0	0	0	88.9406	92.8842	1	0	0	0	0	0	0			0	0	0	2	0	1.18
1864	6	2013-02-18	1	65	50	61	0.690045	58	-3	0.95082	0	0	0	118.105	63.2059	0	0	1	0	0	0	0			0	0	0	1	0	1.1732
1865	3	2015-02-13	1	53	56	60	0.678733	57	-3	0.95	0	0	0	131.596	103.394	0	0	1	0	0	1	0			0	0	0	1	0	1.62
1866	6	2015-05-27	1	77	41	59	0.667421	56	-3	0.949153	0	0	0	124.598	58.2912	0	0	1	0	0	0	0			0	0	0	1	0	1.1732
1867	5	2016-11-07	1	63	50	59	0.667421	56	-3	0.949153	0	0	0	128.719	82.1331	0	0	0	0	0	0	0			0	0	0	1	0	0.95
1868	4	2016-09-19	0	37	60	59	0.667421	56	-3	0.949153	0	0	0	130.026	102.261	0	0	0	0	0	1	0			0	0	0	1	0	1.1732
1869	4	2016-01-18	0	69	64.4654	59	0.667421	56	-3	0.949153	0	0	0	98.2261	98.9955	0	0	0	0	0	0	0			0	0	0	2	0	1.51
1870	6	2015-10-26	0	57	64.4654	58	0.656109	55	-3	0.948276	0	0	0	126.105	89.4495	0	0	1	0	0	0	0			0	0	0	1	0	1.49
1871	4	2016-05-16	1	66	64	58	0.656109	55	-3	0.948276	0	0	0	135.6	119.129	0	0	0	0	0	1	1	3		1	0	0	1	0	1.1732
1872	3	2015-12-09	1	71	80	58	0.656109	55	-3	0.948276	0	0	0	103.422	136.075	0	0	1	0	0	0	1	3		1	0	0	2	0	1.1732
1873	5	2014-10-13	1	53	64.4654	56	0.633484	53	-3	0.946429	0	0	0	135.935	109.121	1	0	1	0	0	0	0			1	0	0	1	0	1.82
1874	6	2015-03-11	0	4	40	53	0.599548	50	-3	0.943396	0	0	0	139.926	60.7257	1	0	1	0	0	1	0			1	0	0	1	0	1.18
1875	2	2014-09-26	1	66	64.4654	53	0.599548	50	-3	0.943396	0	0	0	158.612	149.101	1	0	0	0	0	1	0			0	0	0	1	0	1.13
1876	5	2011-10-18	0	6	51.5	53	0.599548	50	-3	0.943396	0	0	0	144.043	90.01	0	0	0	0	0	1	0			0	0	0	1	0	0.99
1877	5	2014-03-05	1	63	55	51	0.576923	48	-3	0.941176	0	0	0	149.881	97.9126	0	0	1	0	0	1	0			0	0	0	1	0	1
1878	6	2015-04-10	1	72	68	50	0.565611	47	-3	0.94	0	0	0	111.666	95.8715	0	1	0	0	0	0	0		1	1	0	0	2	0	1.69
1879	5	2014-12-01	1	50	59	49	0.554299	46	-3	0.938776	0	0	0	159.347	116.311	0	0	0	0	0	1	0			1	0	0	1	0	0.79
1880	4	2016-04-11	1	63	63	47	0.531674	44	-3	0.93617	0	0	0	168.549	133.405	0	0	0	0	0	1	0			1	0	0	1	0	0.75
1881	5	2014-01-29	1	63	64.4654	92	1.04072	88	-4	0.956522	0	0	0	75.4392	62.0018	0	0	1	1	0	1	0		4	1	1	0	1	0	1.1732
1882	5	2011-05-16	1	38	61	136	1.53846	132	-4	0.970588	0	0	0	49.1095	43.4943	0	0	0	0	0	1	0			0	0	0	1	0	0.97
1883	3	2016-04-06	0	4	80	122	1.38009	118	-4	0.967213	0	0	0	43.3527	62.9007	0	0	0	0	0	0	0	2		1	0	1	2	0	1.53
1884	5	2015-01-21	0	5	77	109	1.23303	105	-4	0.963303	0	0	0	46.1125	53.5815	0	0	0	0	0	1	0	2		0	0	0	2	0	1.77
1885	5	2016-08-03	0	57	58	107	1.21041	103	-4	0.962617	0	0	0	63.7268	49.1886	0	0	0	0	0	1	0			0	0	0	1	0	1.03
1886	5	2016-01-13	0	78	71	106	1.1991	102	-4	0.962264	0	0	0	47.9798	52.509	0	0	0	0	0	1	0			0	0	0	2	0	1.25
1887	5	2015-09-30	0	53	64.4654	105	1.18778	101	-4	0.961905	0	0	0	64.7801	54.3749	0	0	1	0	0	0	0			1	0	0	1	0	1.32
1888	5	2014-08-20	1	72	64.4654	102	1.15385	98	-4	0.960784	0	0	0	67.2122	56.8501	0	0	0	0	0	0	0			1	0	0	1	0	1.1732
1889	5	2014-12-05	1	33	71	101	1.14253	97	-4	0.960396	0	0	0	50.2542	52.8413	0	0	1	0	0	1	0	2		0	0	0	2	0	1.48
1890	6	2016-07-08	0	69	86	97	1.09729	93	-4	0.958763	0	0	0	50.9942	55.9011	0	0	0	0	0	0	0			0	0	0	2	0	1.08
1891	3	2013-06-13	0	58	74	95	1.07466	91	-4	0.957895	0	0	0	59.0303	78.3898	0	0	0	0	0	1	0			1	0	0	2	0	1.17
1892	5	2014-04-28	1	62	64.4654	94	1.06335	90	-4	0.957447	0	0	0	74.9683	65.6793	0	1	1	0	0	0	0			0	0	0	1	0	1.3
1893	6	2017-01-04	0	57	66	93	1.05204	89	-4	0.956989	0	0	0	73.5195	58.7871	0	0	0	0	0	1	0			0	0	0	1	0	1.26
1894	5	2016-09-12	1	33	60	93	1.05204	89	-4	0.956989	0	0	0	75.1632	59.3717	0	0	0	0	0	1	0			0	0	0	1	0	1.41
1895	5	2015-06-24	0	62	59	93	1.05204	89	-4	0.956989	0	0	0	75.432	59.2657	0	0	0	0	0	0	0	2		0	0	0	1	0	1.24
1896	5	2016-01-25	0	39	62	86	0.972851	82	-4	0.953488	0	0	0	83.2063	69.4776	0	0	0	0	0	1	0			0	0	0	1	0	1.1732
1897	5	2016-01-25	0	39	62	86	0.972851	82	-4	0.953488	0	0	0	83.2063	69.4776	0	0	1	0	0	1	0			0	0	0	1	0	0.62
1898	4	2015-06-05	0	68	43	86	0.972851	82	-4	0.953488	0	0	0	85.1312	52.2091	0	0	0	0	0	0	0		2	1	0	1	1	0	1.1732
1899	4	2015-01-21	0	64	74	84	0.950226	80	-4	0.952381	0	0	0	64.4167	76.2701	0	0	0	0	0	1	0			0	0	0	2	0	1.1732
1900	6	2013-04-19	0	72	58	83	0.938914	79	-4	0.951807	0	0	0	83.0827	55.0673	1	0	0	0	0	1	0			0	0	0	1	0	0.98
1901	5	2016-06-06	0	73	63	83	0.938914	79	-4	0.951807	0	0	0	86.4725	72.4478	0	0	0	0	0	1	0		1	1	0	0	1	0	0.99
1902	5	2016-04-11	1	53	77	81	0.91629	77	-4	0.950617	0	0	0	65.7056	75.7755	0	0	1	0	0	0	0			1	0	0	2	0	1.22
1903	4	2017-03-03	1	31	64.4654	80	0.904977	76	-4	0.95	0	0	0	67.3781	67.005	1	0	0	0	0	1	0			0	0	0	2	0	0.88
1904	5	2012-05-30	1	63	52	80	0.904977	76	-4	0.95	0	0	0	88.9106	58.3149	0	0	0	0	0	1	0	2		1	0	0	1	0	1.14
1905	6	2016-04-20	0	42	72	79	0.893665	75	-4	0.949367	0	0	0	65.0824	60.0547	0	0		0	0	1	0		1	1	0	1	2	0	1.09
1906	5	2016-09-30	0	65	56	79	0.893665	75	-4	0.949367	0	0	0	89.7579	62.1339	0	0	0	0	0	1	0			0	0	0	1	0	1.44
1907	4	2016-11-23	0	68	86	79	0.893665	75	-4	0.949367	0	0	0	68.6524	91.9293	0	0	0	0	0	0	0			1	0	0	2	0	0.99
1908	5	2014-01-20	1	75	74	78	0.882353	74	-4	0.948718	0	0	0	68.7433	76.1313	0	0	0	0	0	0	0			0	0	0	2	0	1.55
1909	5	2012-12-19	1	62	82.9	77	0.871041	73	-4	0.948052	0	0	0	69.7536	86.2906	0	0	0	0	0	1	0			0	0	0	2	0	1.15
1910	4	2013-03-15	0	52	76	77	0.871041	73	-4	0.948052	0	0	0	70.4138	82.0603	0	0	0	0	0	0	0			0	0	0	2	0	2.17
1911	5	2015-04-01	0	37	47	76	0.859729	72	-4	0.947368	0	0	0	93.8164	54.0901	0	0	0	0	0	0	1	3		0	0	0	1	0	0.97
1912	4	2016-06-02	0	64	53	76	0.859729	72	-4	0.947368	0	0	0	97.8049	71.9125	0	0	1	0	0	1	0			0	0	0	1	0	1.1732
1913	5	2015-12-21	0	78	75	75	0.848416	71	-4	0.946667	0	0	0	71.2794	77.2501	1	1	0	0	0	0	0			0	0	0	2	0	0.79
1914	5	2015-12-21	1	68	66	73	0.825792	69	-4	0.945205	0	0	0	98.9321	81.526	0	0	0	0	0	1	0			0	0	0	1	0	1.23
1915	4	2015-12-30	0	61	61	73	0.825792	69	-4	0.945205	0	0	0	103.83	89.8143	0	0	0	0	0	1	0			0	0	0	1	0	1.59
1916	3	2011-07-08	1	66	63.2	72	0.81448	68	-4	0.944444	0	0	0	106.848	97.7828	1	0	0	0	0	0	0			0	0	0	1	0	1.04
1917	3	2015-07-31	1	6	64	72	0.81448	68	-4	0.944444	0	0	0	107.199	99.8817	0	0	0	0	0	0	0			0	0	0	1	0	1.03
1918	5	2012-04-10	1	59	70.3	70	0.791855	66	-4	0.942857	0	0	0	77.8738	80.5359	0	0	0	0	0	1	0			1	0	0	2	0	1.11
1919	5	2016-05-23	0	67	54	69	0.780543	65	-4	0.942029	0	0	0	107.199	75.19	0	0	1	0	0	0	0			1	0	1	1	0	1.18
1920	6	2014-11-26	0	49	60	68	0.769231	64	-4	0.941176	0	0	0	105.239	72.0669	0	0	0	0	0	0	0		1	1	0	1	1	0	1.1732
1921	5	2015-06-16	0	76	74	68	0.769231	64	-4	0.941176	0	0	0	81.1772	90.0715	0	0	0	0	0	0	0			0	0	0	2	0	0.97
1922	6	2016-01-20	0	67	55	67	0.757919	63	-4	0.940299	0	0	0	107.902	69.8721	0	0	1	0	0	0	0			0	0	0	1	0	1.54
1923	5	2014-06-25	1	68	54	67	0.757919	63	-4	0.940299	0	0	0	108.454	70.3395	0	0	1	0	0	1	0			1	0	1	1	0	0.7
1924	5	2015-01-12	0	6	51	67	0.757919	63	-4	0.940299	0	0	0	109.557	69.5633	0	0	1	0	0	0	0		1	1	0	0	1	0	0.98
1925	5	2012-12-19	1	54	79	67	0.757919	63	-4	0.940299	0	0	0	82.0717	95.3001	0	0	1	0	0	0	0			0	0	0	2	0	0.83
1926	5	2015-01-14	0	57	55	66	0.746606	62	-4	0.939394	0	0	0	110.033	71.7129	0	0	0	0	0	0	0			0	0	0	1	0	1.03
1927	5	2013-06-13	0	62	65	66	0.746606	62	-4	0.939394	0	0	0	112.355	93.0137	0	0	0	0	0	1	0			0	0	0	1	0	1.05
1928	4	2013-05-06	1	59	62	66	0.746606	62	-4	0.939394	0	0	0	114.533	95.2871	0	0	0	0	0	0	0			0	0	0	1	0	1.15
1929	6	2016-10-26	0	54	43	62	0.701357	58	-4	0.935484	0	0	0	116.792	55.8903	0	0	1	0	0	1	0		1	1	0	0	1	0	1.52
1930	5	2016-02-22	0	79	50	62	0.701357	58	-4	0.935484	0	0	0	118.77	70.8373	0	0	1	0	0	0	0	2		0	0	0	1	0	1.18
1931	5	2015-04-27	0	64	65	61	0.690045	57	-4	0.934426	0	0	0	120.347	91.1034	0	0	0	0	0	0	0			0	0	0	1	0	0.97
1932	5	2015-06-03	1	65	64.4654	60	0.678733	56	-4	0.933333	0	0	0	124.698	99.0811	0	0	0	0	0	1	0		1	1	0	0	1	0	0.71
1933	4	2015-01-12	0	52	66	59	0.667421	55	-4	0.932203	0	0	0	132.852	120.506	0	0	1	0	0	0	0			0	0	0	1	0	0.96
1934	6	2016-06-15	1	55	75	58	0.656109	54	-4	0.931034	0	0	0	93.3505	87.2884	0	0	0	0	0	1	0	2		1	0	1	2	0	1.17
1935	4	2016-07-08	0	58	59	58	0.656109	54	-4	0.931034	0	0	0	132.833	102.872	0	0	0	0	0	1	0			0	0	0	1	0	1.88
1936	5	2016-01-04	0	43	50	57	0.644796	53	-4	0.929825	0	0	0	132.032	80.1847	0	0	0	0	0	1	0			1	0	0	1	0	0.91
1937	5	2017-03-24	0	71	64.4654	56	0.633484	52	-4	0.928571	0	0	0	100.692	92.1173	0	0	0	0	0	1	0			0	0	0	2	0	1.1732
1938	5	2013-01-06	0	63	63	54	0.61086	50	-4	0.925926	0	0	0	139.914	104.585	0	0	0	0	0	0	0			0	0	0	1	0	0.97
1939	5	2014-09-02	1	56	56	54	0.61086	50	-4	0.925926	0	0	0	142.188	99.4775	0	0	1	0	0	1	1	4		0	0	0	1	0	0.87
1940	5	2014-09-24	0	41	50	52	0.588235	48	-4	0.923077	0	0	0	145.822	85.3364	0	0	1	0	0	1	0			0	0	0	1	0	1.29
1941	6	2016-03-02	0	69	60	51	0.576923	47	-4	0.921569	0	0	0	147.271	98.1906	0	0	1	0	0	1	1	3		1	0	0	1	0	1.25
1942	5	2016-07-27	1	68	59	50	0.565611	46	-4	0.92	0	0	0	154.006	109.139	1	0	0	0	0	1	0		2	1	0	0	1	0	1.28
1943	4	2016-02-24	1	63	73	45	0.50905	41	-4	0.911111	0	0	0	130.915	135.02	0	0	0	0	0	1	0			0	0	0	2	0	1.06
1944	5	2015-11-27	0	62	97	144	1.62896	139	-5	0.965278	0	0	0	33.5016	51.5242	0	0	0	0	0	0	1	4		0	0	0	2	0	1.33
1945	4	2017-01-04	0	49	80	118	1.33484	113	-5	0.957627	0	0	0	43.419	58.2426	0	0	1	0	0	1	0			0	0	0	2	0	0.91
1946	5	2016-12-12	1	45	64.4654	117	1.32353	112	-5	0.957265	0	0	0	57.363	49.5338	0	1	1	0	0	0	0		2	0	0	0	1	0	1.34
1947	3	2016-11-18	0	40	82	107	1.21041	102	-5	0.953271	0	0	0	50.4723	73.6364	0	0	0	0	0	1	0		1	0	0	0	2	0	1.1732
1948	5	2016-04-27	0	42	64	103	1.16516	98	-5	0.951456	0	0	0	66.508	56.0735	0	0	1	0	0	0	0			1	0	0	1	0	0.85
1949	5	2017-01-20	1	46	76	100	1.13122	95	-5	0.95	0	0	0	50.9801	57.8822	1	0	1	0	0	0	0			0	0	0	2	0	1.65
1950	5	2016-08-03	0	61	64.4654	100	1.13122	95	-5	0.95	0	0	0	68.8492	58.3015	0	0	0	0	0	0	1	4		0	0	1	1	0	1.1732
1951	2	2015-03-27	0	33	67	99	1.11991	94	-5	0.949495	0	0	0	78.7453	86.2108	0	0	0	0	0	1	0			0	0	0	1	0	1.1732
1952	5	2013-03-06	1	81	56	98	1.1086	93	-5	0.94898	0	0	0	69.8752	49.6839	0	1	0	0	0	1	0		1	1	0	0	1	0	1.28
1953	5	2013-07-10	0	68	61	96	1.08597	91	-5	0.947917	0	0	0	72.312	57.9641	0	0	0	0	0	0	0			0	0	0	1	0	1.1732
1954	4	2015-05-27	0	7	64	96	1.08597	91	-5	0.947917	0	0	0	73.9107	66.3067	0	0	1	0	0	1	0			0	0	0	1	0	0.61
1955	5	2015-09-28	0	48	60	94	1.06335	89	-5	0.946809	0	0	0	73.094	54.6757	0	0	0	0	0	1	0			1	0	0	1	0	0.86
1956	7	2015-01-05	0	49	64	93	1.05204	88	-5	0.946237	0	0	0	71.6711	48.8157	0	0	0	0	0	0	0	2		1	0	0	1	0	0.99
1957	5	2014-07-09	1	80	66	91	1.02941	86	-5	0.945055	0	0	0	76.8324	65.8464	0	0	0	0	0	1	0			0	0	0	1	0	1.06
1958	5	2015-06-26	1	46	64.4654	88	0.995475	83	-5	0.943182	0	0	0	79.6992	65.9043	0	1	1	0	0	1	0		1	0	0	0	1	0	1.13
1959	5	2016-12-14	1	69	44	88	0.995475	83	-5	0.943182	0	0	0	79.9148	45.5236	0	0	0	0	0	1	0			0	0	0	1	0	0.39
1960	4	2017-03-13	0	64	64.4654	88	0.995475	83	-5	0.943182	0	0	0	60.909	62.9244	0	0	0	0	0	1	0			0	0	0	2	0	1.21
1961	3	2016-04-01	0	72	68	88	0.995475	83	-5	0.943182	0	0	0	62.6329	72.3508	0	0	1	0	0	1	1	4		0	0	0	2	0	0.79
1962	5	2016-06-13	0	59	54	85	0.961538	80	-5	0.941176	0	0	0	84.0046	60.2822	0	0	1	0	0	1	0		1	0	0	0	1	0	1.1
1963	5	2013-07-19	0	56	65	84	0.950226	79	-5	0.940476	0	0	0	85.134	73.3373	1	0	1	0	1	1	0			1	0	0	1	0	1.1732
1964	5	2015-01-28	0	68	74	84	0.950226	79	-5	0.940476	0	0	0	62.3097	66.9353	0	0	0	0	0	1	0			1	0	0	2	0	1.22
1965	5	2014-06-03	0	36	55	84	0.950226	79	-5	0.940476	0	0	0	85.0964	61.9445	0	0	0	0	0	0	0			0	0	0	1	0	1.42
1966	5	2016-10-09	0	70	60	81	0.91629	76	-5	0.938272	0	0	0	88.298	68.6409	0	0	0	0	0	1	0	2		0	0	0	1	0	1.1732
1967	3	2013-04-10	0	82	77	81	0.91629	76	-5	0.938272	0	0	0	69.419	90.749	0	0	0	0	0	0	0			1	0	0	2	0	1.33
1968	7	2017-01-11	1	74	58	80	0.904977	75	-5	0.9375	0	0	0	84.8858	49.7722	0	0	1	0	0	1	0	2		1	0	0	1	0	0.92
1969	4	2016-08-31	0	67	58	80	0.904977	75	-5	0.9375	0	0	0	91.2761	72.272	0	0	0	0	0	0	0			0	0	0	1	0	1.17
1970	5	2015-04-29	0	67	58	79	0.893665	74	-5	0.936709	0	0	0	89.6297	63.9159	0	0	0	0	0	1	0	2		1	0	0	1	0	1.05
1971	5	2014-06-09	0	6	79	79	0.893665	74	-5	0.936709	0	0	0	67.1327	77.2587	0	0	0	0	0	0	0			0	0	0	2	0	1.37
1972	5	2017-02-24	0	60	55	78	0.882353	73	-5	0.935897	0	0	0	93.2163	68.1967	0	0	0	0	0	0	0			0	0	0	1	0	1.1732
1973	5	2016-06-17	0	60	78	77	0.871041	72	-5	0.935065	0	0	0	69.0416	77.7262	0	0	0	0	0	1	1			0	0	0	2	0	1.1732
1974	5	2015-09-23	0	65	70	76	0.859729	71	-5	0.934211	0	0	0	70.1763	71.054	0	0	0	0	0	0	0			0	0	0	2	0	1.1732
1975	6	2015-10-21	0	65	55	75	0.848416	70	-5	0.933333	0	0	0	92.4416	54.264	0	0	0	0	0	0	0			0	0	0	1	0	1.1732
1976	5	2014-10-11	1	74	62	75	0.848416	70	-5	0.933333	0	0	0	97.1167	78.6304	0	0	0	0	0	0	1			0	0	0	1	0	1.29
1977	5	2015-01-14	0	48	50	74	0.837104	69	-5	0.932432	0	0	0	97.8355	62.1526	0	0	0	0	0	1	0	2		0	0	0	1	0	1.3
1978	5	2016-05-13	0	61	61	74	0.837104	69	-5	0.932432	0	0	0	99.0656	79.758	0	0	0	0	0	0	0			0	0	0	1	0	1.11
1979	5	2015-04-10	1	7	63	73	0.825792	68	-5	0.931507	0	0	0	99.1677	78.6418	0	0	0	0	0	0	0			0	0	0	1	0	0.91
1980	4	2016-03-11	0	80	98	73	0.825792	68	-5	0.931507	0	0	0	76.5263	120.176	0	0	1	0	0	1	0			0	0	0	2	0	1.43
1981	5	2013-06-17	1	78	40	71	0.803167	66	-5	0.929577	0	0	0	103.685	54.0535	0	0	0	0	0	1	1	3		0	0	0	1	0	1.6
1982	4	2016-09-30	1	61	76	70	0.791855	65	-5	0.928571	0	0	0	78.7667	90.9741	0	0	0	0	0	1	0			0	0	0	2	0	1.1732
1983	6	2016-09-28	1	36	55	69	0.780543	64	-5	0.927536	0	0	0	104.108	67.2141	0	0	0	0	0	0	0			0	0	0	1	0	1.1732
1984	5	2012-12-12	0	58	60	68	0.769231	63	-5	0.926471	0	0	0	107.556	80.1667	0	0	1	0	0	0	0	2		0	0	0	1	0	1.01
1985	5	2015-12-21	0	60	51	68	0.769231	63	-5	0.926471	0	0	0	109.074	72.1959	0	0	1	0	0	1	0		4	0	0	0	1	0	0.93
1986	5	2014-05-14	0	67	70	67	0.757919	62	-5	0.925373	0	0	0	82.2976	85.3602	0	0	0	0	0	1	0			0	0	1	2	0	1.91
1987	5	2017-03-13	0	67	64.4654	66	0.746606	61	-5	0.924242	0	0	0	83.7571	79.872	0	0	0	0	0	1	0			0	0	0	2	0	1.24
1988	3	2013-05-22	0	62	76	65	0.735294	60	-5	0.923077	0	0	0	90.566	115.008	0	0	0	0	0	1	0			0	0	0	2	0	1.1732
1989	5	2016-06-13	1	62	60	64	0.723982	59	-5	0.921875	0	0	0	113.965	80.5162	0	0	0	0	0	0	0			1	0	0	1	0	1.13
1990	4	2014-06-23	0	19	58	63	0.71267	58	-5	0.920635	0	0	0	123.433	99.8008	1	0	0	0	0	0	0			0	0	0	1	0	1.52
1991	5	2016-11-28	0	71	63	63	0.71267	58	-5	0.920635	0	0	0	116.874	88.8137	0	0	0	0	0	0	0		1	1	0	0	1	0	0.71
1992	6	2015-11-30	1	7	76	61	0.690045	56	-5	0.918033	0	0	0	87.4575	80.661	0	0	0	0	0	1	0		2	1	0	0	2	0	0.93
1993	4	2014-12-26	1	33	41	60	0.678733	55	-5	0.916667	0	0	0	129.041	71.4651	1	1	1	0	0	1	0		2	1	0	1	1	0	1.1732
1994	4	2015-04-15	0	5	73	60	0.678733	55	-5	0.916667	0	0	0	95.7225	108.062	0	0	1	0	0	0	1	3		0	0	0	2	0	1.1
1995	4	2015-05-18	0	68	56	57	0.644796	52	-5	0.912281	0	0	0	138.25	105.845	0	0	0	0	0	1	0			0	0	0	1	0	0.9
1996	5	2016-03-14	0	69	68	56	0.633484	51	-5	0.910714	0	0	0	100.64	96.9631	1	0	1	0	0	1	0			0	0	0	2	0	1.52
1997	5	2014-07-09	0	66	59	54	0.61086	49	-5	0.907407	0	0	0	139.299	95.9751	0	1	0	0	0	1	0			0	0	0	1	0	1.02
1998	5	2014-12-17	0	67	65	54	0.61086	49	-5	0.907407	0	0	0	139.615	106.857	0	0	0	0	0	0	0			0	0	0	1	0	1.04
1999	4	2015-08-26	0	67	70	54	0.61086	49	-5	0.907407	0	0	0	109.358	119.257	0	0	1	0	0	1	0	2		0	0	0	2	0	1.18
[truncated: 670 more rows]
